# Supplementary material
Source: PubMed Central journal article supplement (PMC5495238)
Supplement: pnas.1700203114.sapp.pdf [file pnas.1700203114.sapp.pdf]

Supporting Information for  
*Random Subsets of Structured Deterministic Frames  
 have MANOVA Spectra*  
 arxiv.org/abs/1701.01211

Marina Haikin, Ram Zamir, Matan Gavish

**Full results**

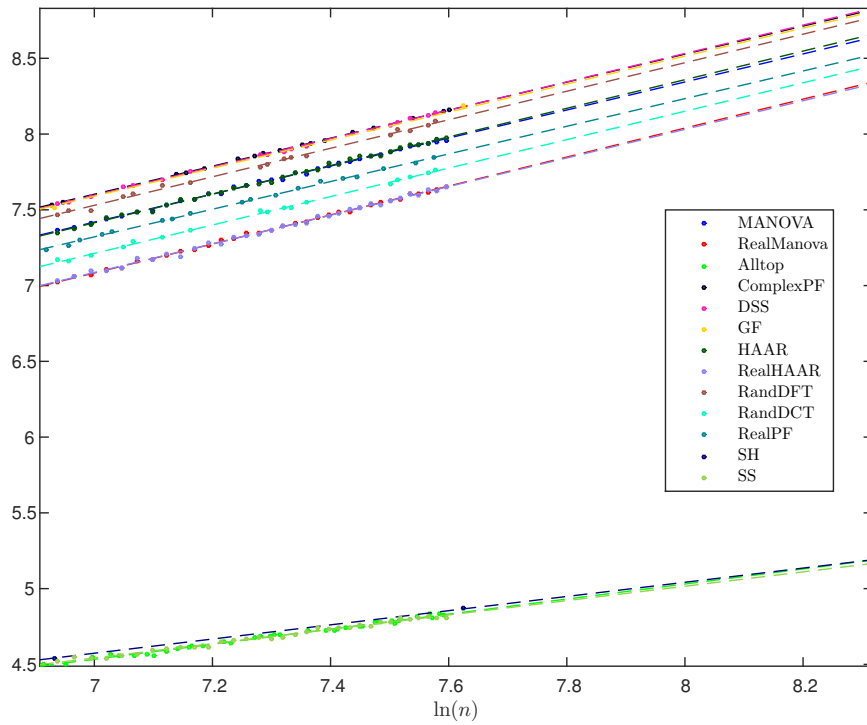

Figure 1: Test 1 for  $\gamma = 0.5$  and  $\beta = 0.8$ . Plot shows  $-\frac{1}{2} \ln \text{Var}_{K_n}(\Delta_{KS}(X_{K_n}^{(n)}; n, m_n, k_n))$  over  $\ln(n)$ .

| Frame      | $R^2$   | $\hat{b}$ | $SE(\hat{b})$ | p-value<br>$b = b_{MANOVA}$ |
|------------|---------|-----------|---------------|-----------------------------|
| MANOVA     | 0.99828 | 0.92505   | 0.00690       | 1                           |
| DSS        | 0.99858 | 0.93652   | 0.00911       | 0.32089                     |
| GF         | 0.99921 | 0.92474   | 0.02608       | 0.99082                     |
| ComplexPF  | 0.99950 | 0.92454   | 0.00535       | 0.95390                     |
| Alltop     | 0.98906 | 0.49660   | 0.00883       | 9.4651e-47                  |
| SS         | 0.98767 | 0.47354   | 0.00950       | 5.8136e-45                  |
| HAAR       | 0.99736 | 0.94421   | 0.00873       | 0.09019                     |
| RandDFT    | 0.99544 | 0.94127   | 0.01644       | 0.36788                     |
| RealMANOVA | 0.99873 | 0.95610   | 0.00613       | 1                           |
| RealPF     | 0.99871 | 0.91244   | 0.00821       | 9.7174e-05                  |
| SH         | 0.99989 | 0.46822   | 0.00492       | 6.3109e-35                  |
| RealHAAR   | 0.99596 | 0.94456   | 0.01081       | 0.35675                     |
| RandDCT    | 0.99773 | 0.93859   | 0.01156       | 0.18737                     |

Table 1: Results of Test 1 for  $\gamma = 0.5$  and  $\beta = 0.8$ .

| Frame      | $R^2$   | $\hat{b}$ | $SE(\hat{b})$ | p-value<br>$b = b_{MANOVA}$ |
|------------|---------|-----------|---------------|-----------------------------|
| MANOVA     | 0.99993 | 0.85234   | 0.00126       | 1                           |
| DSS        | 0.99996 | 0.81176   | 0.00140       | 1.1392e-25                  |
| GF         | 0.99983 | 0.76518   | 0.00990       | 5.5733e-10                  |
| ComplexPF  | 0.99994 | 0.80178   | 0.00155       | 1.2255e-28                  |
| Alltop     | 0.99581 | 0.51708   | 0.00567       | 3.1903e-58                  |
| SS         | 0.99458 | 0.49792   | 0.00660       | 3.2466e-53                  |
| HAAR       | 0.99988 | 0.85488   | 0.00167       | 0.22822                     |
| RandDFT    | 0.99985 | 0.83460   | 0.00261       | 1.8531e-07                  |
| RealMANOVA | 0.99996 | 0.85357   | 0.00101       | 1                           |
| RealPF     | 0.99996 | 0.82979   | 0.00131       | 7.8145e-19                  |
| SH         | 0.99999 | 0.49853   | 0.00144       | 2.9296e-51                  |
| RealHAAR   | 0.99975 | 0.85054   | 0.00243       | 0.25527                     |
| RandDCT    | 0.99992 | 0.84003   | 0.00189       | 9.9169e-08                  |

Table 2: Results of Test 1 (MSE) for  $\gamma = 0.5$  and  $\beta = 0.8$ .

| Frame      | $R^2$   | $\hat{b}$ | $SE(\hat{b})$ | p-value<br>$b = b_{MANOVA}$ |
|------------|---------|-----------|---------------|-----------------------------|
| MANOVA     | 0.98420 | 1.43554   | 0.03267       | 1                           |
| DSS        | 0.99108 | 1.40361   | 0.03439       | 0.50421                     |
| GF         | 0.99966 | 1.52986   | 0.02820       | 0.03630                     |
| ComplexPF  | 0.98611 | 1.44250   | 0.04421       | 0.89987                     |
| Alltop     | 0.98308 | 1.45646   | 0.03230       | 0.65043                     |
| SS         | 0.98659 | 1.49779   | 0.03137       | 0.17428                     |
| HAAR       | 0.98871 | 1.52271   | 0.02923       | 0.05117                     |
| RandDFT    | 0.98848 | 1.46925   | 0.04095       | 0.52317                     |
| RealMANOVA | 0.99127 | 1.26008   | 0.02124       | 1                           |
| RealPF     | 0.99222 | 1.32138   | 0.02925       | 0.09656                     |
| SH         | 0.99990 | 1.33889   | 0.01308       | 0.00344                     |
| RealHAAR   | 0.98687 | 1.22579   | 0.02540       | 0.30443                     |
| RandDCT    | 0.98585 | 1.30063   | 0.04024       | 0.37744                     |

Table 3: Results of Test 2 for  $\Psi_{AC}$ ,  $\gamma = 0.5$  and  $\beta = 0.8$

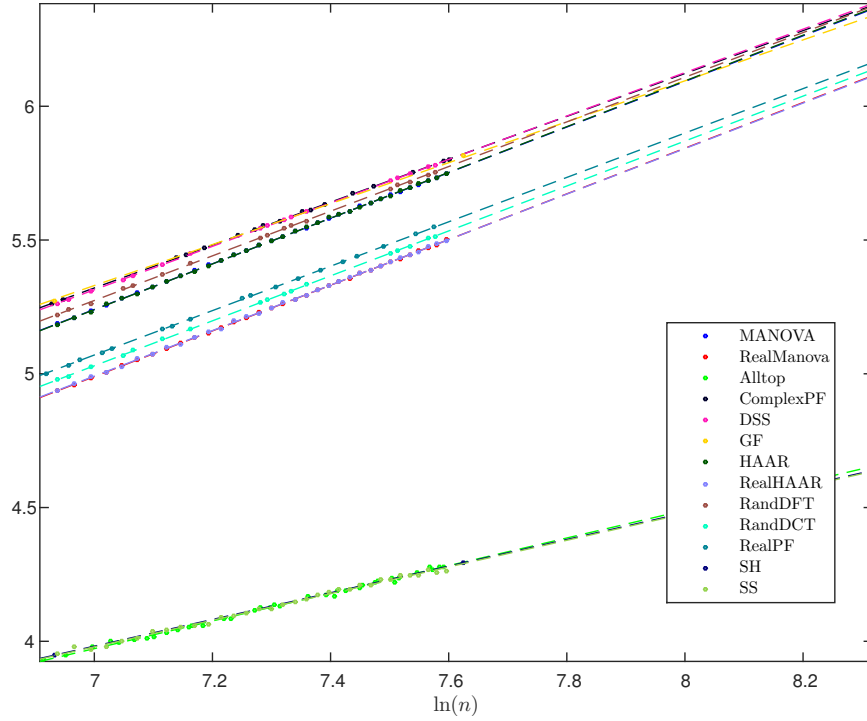

Figure 2: Test 1 for  $\gamma = 0.5$  and  $\beta = 0.8$ . Plot shows  $-\frac{1}{2} \ln \mathbb{E}_{K_n}(\Delta_{KS}(X_{K_n}^{(n)}; n, m_n, k_n)^2)$  over  $\ln(n)$ .

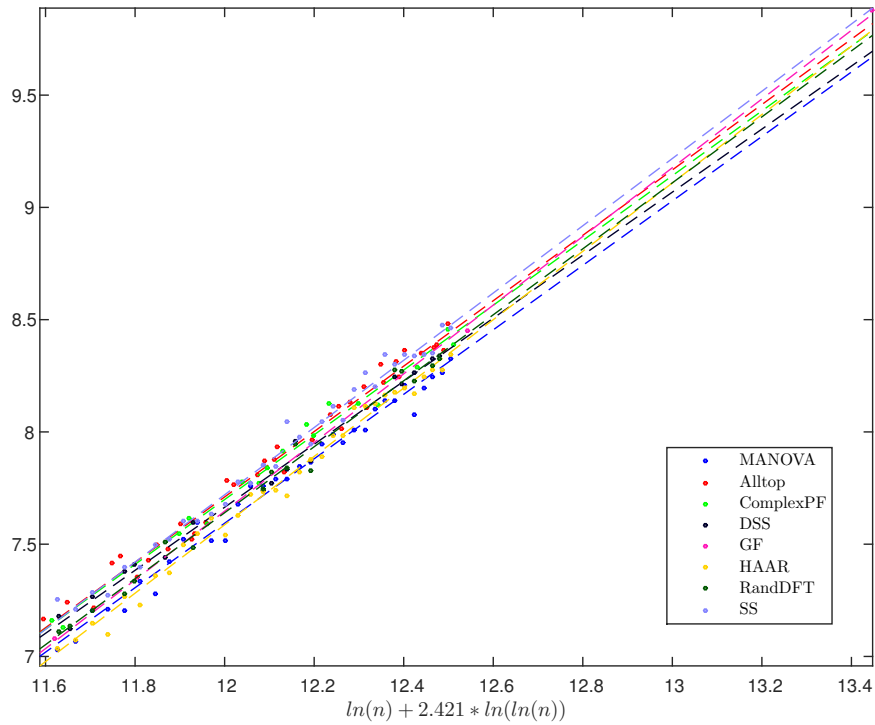

Figure 3: Test 2 for  $\Psi_{AC}$ , complex frames  $\gamma = 0.5$  and  $\beta = 0.8$ . Plot shows  $-\ln \mathbb{E}_{K_n}(\Delta_{\Psi}(X_{K_n}^{(n)}; n, m_n, k_n)^2)$

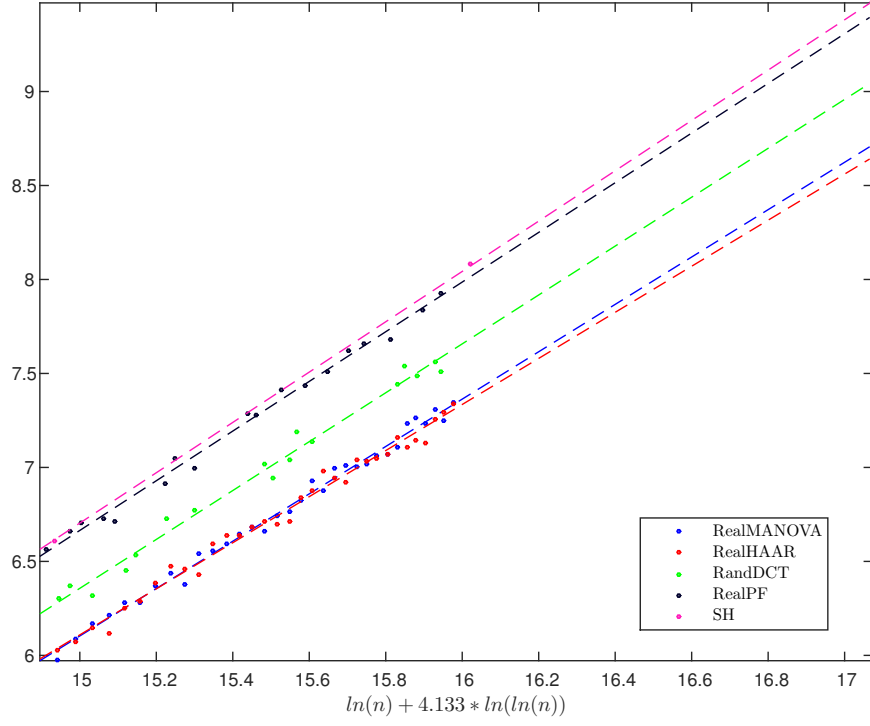

Figure 4: Test 2 for  $\Psi_{AC}$ , real frames  $\gamma = 0.5$  and  $\beta = 0.8$ . Plot shows  $-\ln \mathbb{E}_{K_n}(\Delta_{\Psi}(X_{K_n}^{(n)}; n, m_n, k_n)^2)$

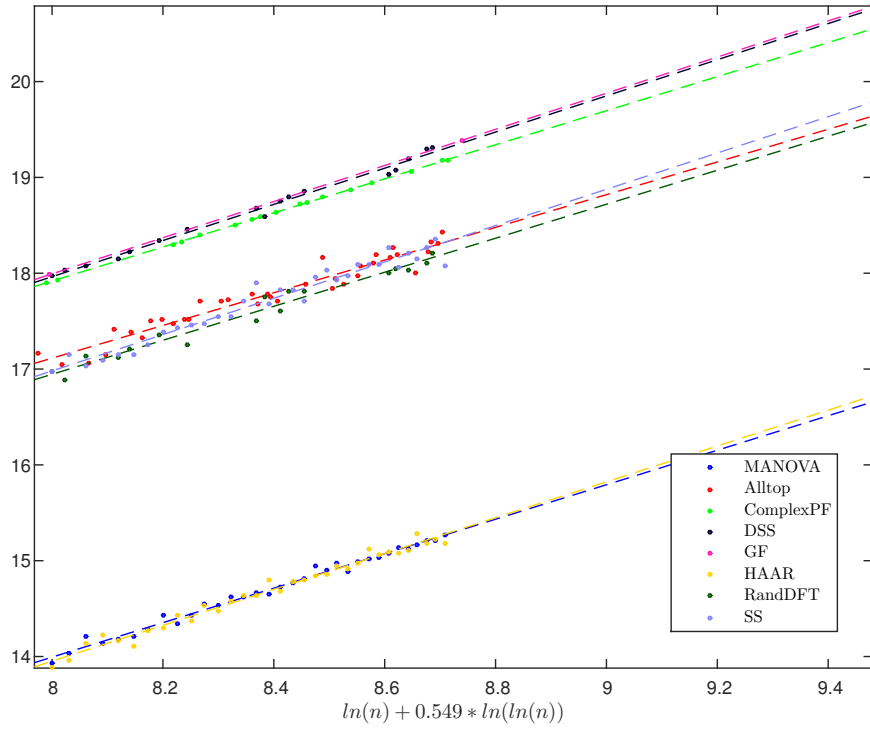

Figure 5: Test 2 for  $\Psi_{Shannon}$ , complex frames  $\gamma = 0.5$  and  $\beta = 0.8$ . Plot shows  $-\ln \mathbb{E}_{K_n}(\Delta_{\Psi}(X_{K_n}^{(n)}; n, m_n, k_n)^2)$

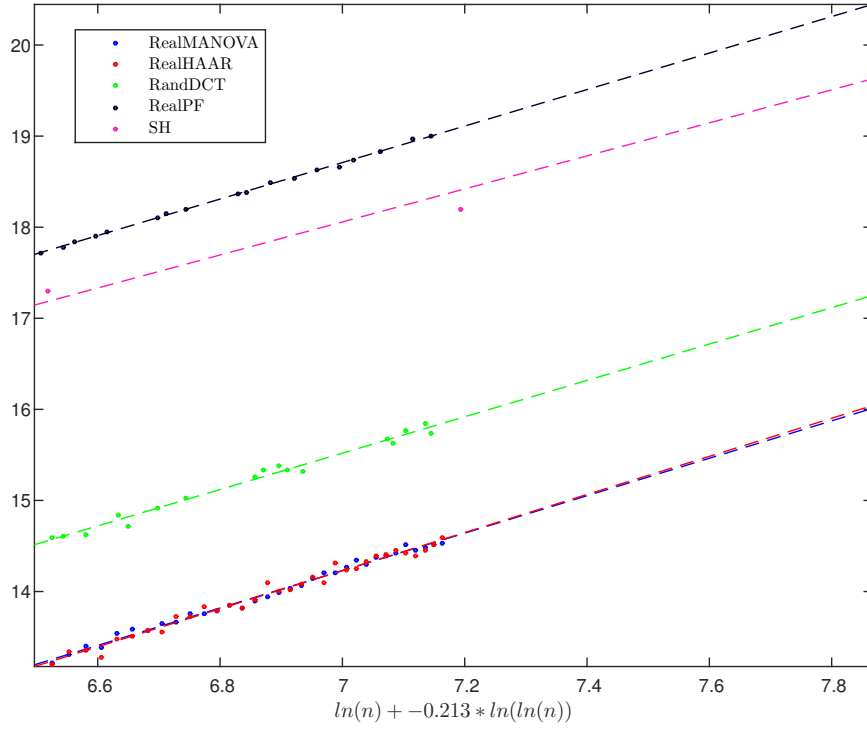

Figure 6: Test 2 for  $\Psi_{Shannon}$ , real frames  $\gamma = 0.5$  and  $\beta = 0.8$ . Plot shows  $-\ln \mathbb{E}_{K_n}(\Delta_{\Psi}(X_{K_n}^{(n)}; n, m_n, k_n)^2)$

| Frame      | $R^2$   | $\hat{b}$ | $SE(\hat{b})$ | p-value<br>$b = b_{MANOVA}$ |
|------------|---------|-----------|---------------|-----------------------------|
| MANOVA     | 0.98721 | 1.79936   | 0.03678       | 1                           |
| DSS        | 0.99110 | 1.88674   | 0.04615       | 0.14551                     |
| GF         | 0.99997 | 1.88548   | 0.01073       | 0.03161                     |
| ComplexPF  | 0.99977 | 1.77783   | 0.00701       | 0.56808                     |
| Alltop     | 0.93841 | 1.70618   | 0.07388       | 0.26297                     |
| SS         | 0.95539 | 1.89501   | 0.07355       | 0.24922                     |
| HAAR       | 0.97971 | 1.87082   | 0.04836       | 0.24400                     |
| RandDFT    | 0.96928 | 1.77454   | 0.08157       | 0.78270                     |
| RealMANOVA | 0.99202 | 2.05451   | 0.03309       | 1                           |
| RealPF     | 0.99834 | 2.00345   | 0.02045       | 0.19576                     |
| SH         | 0.97850 | 1.81297   | 0.26874       | 0.37904                     |
| RealHAAR   | 0.98287 | 2.09078   | 0.04958       | 0.54503                     |
| RandDCT    | 0.98364 | 1.99663   | 0.06648       | 0.43977                     |

Table 4: Results of Test 2 for  $\Psi_{Shannon}$ ,  $\gamma = 0.5$  and  $\beta = 0.8$

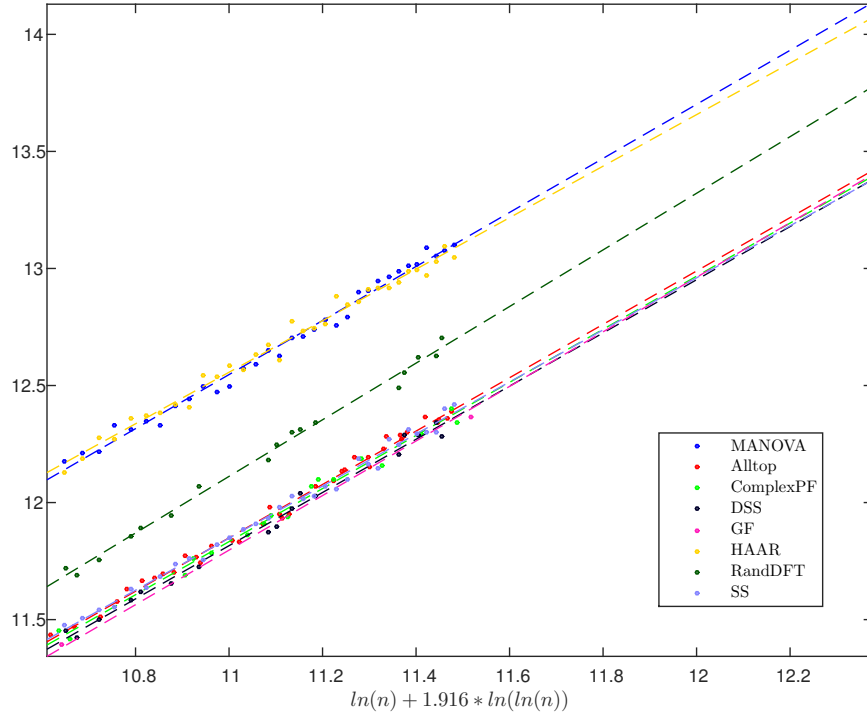

Figure 7: Test 2 for  $\Psi_{RIP}$ , complex frames  $\gamma = 0.5$  and  $\beta = 0.8$ . Plot shows  $-\ln \mathbb{E}_{K_n}(\Delta_{\Psi}(X_{K_n}^{(n)}; n, m_n, k_n)^2)$

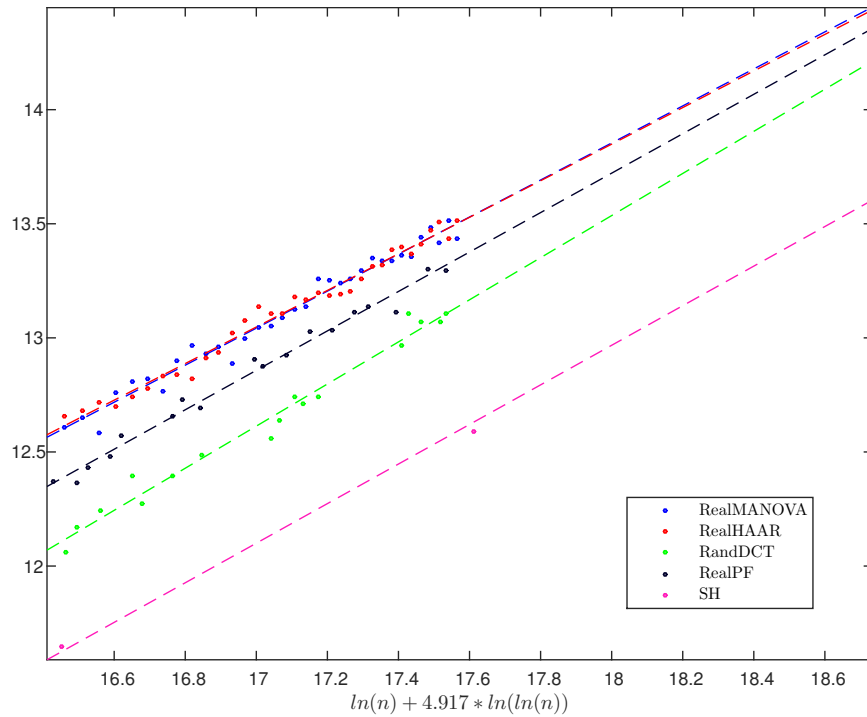

Figure 8: Test 2 for  $\Psi_{RIP}$ , real frames  $\gamma = 0.5$  and  $\beta = 0.8$ . Plot shows  $-\ln \mathbb{E}_{K_n}(\Delta_{\Psi}(X_{K_n}^{(n)}; n, m_n, k_n)^2)$

| Frame      | $R^2$   | $\hat{b}$ | $SE(\hat{b})$ | p-value<br>$b = b_{MANOVA}$ |
|------------|---------|-----------|---------------|-----------------------------|
| MANOVA     | 0.98923 | 1.15439   | 0.02164       | 1                           |
| DSS        | 0.99149 | 1.13602   | 0.02718       | 0.59944                     |
| GF         | 0.99930 | 1.16546   | 0.03085       | 0.77078                     |
| ComplexPF  | 0.98830 | 1.13383   | 0.03185       | 0.59592                     |
| Alltop     | 0.99222 | 1.13994   | 0.01706       | 0.60172                     |
| SS         | 0.99185 | 1.11181   | 0.01810       | 0.13628                     |
| HAAR       | 0.98580 | 1.10043   | 0.02372       | 0.09788                     |
| RandDFT    | 0.99341 | 1.20926   | 0.02543       | 0.10712                     |
| RealMANOVA | 0.97531 | 0.81152   | 0.02319       | 1                           |
| RealPF     | 0.98636 | 0.86413   | 0.02540       | 0.13287                     |
| SH         | 0.99874 | 0.86734   | 0.03077       | 0.15720                     |
| RealHAAR   | 0.98185 | 0.80135   | 0.01957       | 0.73846                     |
| RandDCT    | 0.97830 | 0.92270   | 0.03549       | 0.01179                     |

Table 5: Results of Test 2 for  $\Psi_{RIP}$ ,  $\gamma = 0.5$  and  $\beta = 0.8$

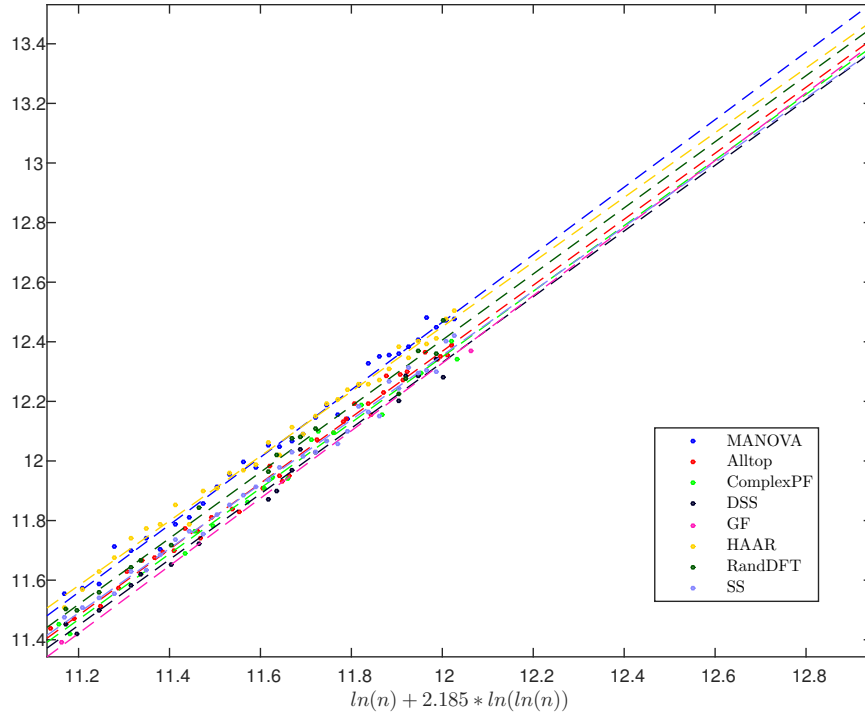

Figure 9: Test 2 for  $\Psi_{max}$ , complex frames  $\gamma = 0.5$  and  $\beta = 0.8$ . Plot shows  $-\ln \mathbb{E}_{K_n}(\Delta_{\Psi}(X_{K_n}^{(n)}; n, m_n, k_n)^2)$

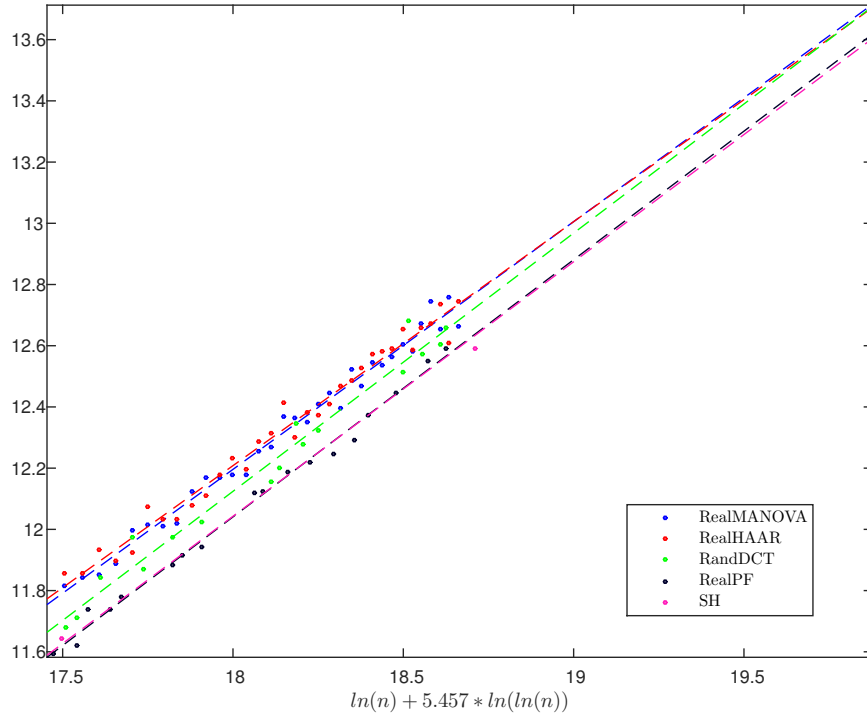

Figure 10: Test 2 for  $\Psi_{max}$ , real frames  $\gamma = 0.5$  and  $\beta = 0.8$ . Plot shows  $-\ln \mathbb{E}_{K_n}(\Delta_\Psi(X_{K_n}^{(n)}; n, m_n, k_n)^2)$

| Frame      | $R^2$   | $\hat{b}$ | $SE(\hat{b})$ | p-value<br>$b = b_{MANOVA}$ |
|------------|---------|-----------|---------------|-----------------------------|
| MANOVA     | 0.98814 | 1.13304   | 0.02230       | 1                           |
| DSS        | 0.99156 | 1.10269   | 0.02626       | 0.38298                     |
| GF         | 0.99927 | 1.13341   | 0.03066       | 0.99229                     |
| ComplexPF  | 0.98831 | 1.10156   | 0.03093       | 0.41339                     |
| Alltop     | 0.99221 | 1.10752   | 0.01659       | 0.36175                     |
| SS         | 0.99184 | 1.08018   | 0.01760       | 0.06754                     |
| HAAR       | 0.99201 | 1.08552   | 0.01750       | 0.09867                     |
| RandDFT    | 0.98924 | 1.10896   | 0.02986       | 0.52136                     |
| RealMANOVA | 0.98467 | 0.80935   | 0.01814       | 1                           |
| RealPF     | 0.99328 | 0.84016   | 0.01727       | 0.22489                     |
| SH         | 0.99870 | 0.83147   | 0.03005       | 0.53311                     |
| RealHAAR   | 0.97961 | 0.79719   | 0.02066       | 0.65963                     |
| RandDCT    | 0.97613 | 0.84366   | 0.03406       | 0.37862                     |

Table 6: Results of Test 2 for  $\Psi_{max}$ ,  $\gamma = 0.5$  and  $\beta = 0.8$



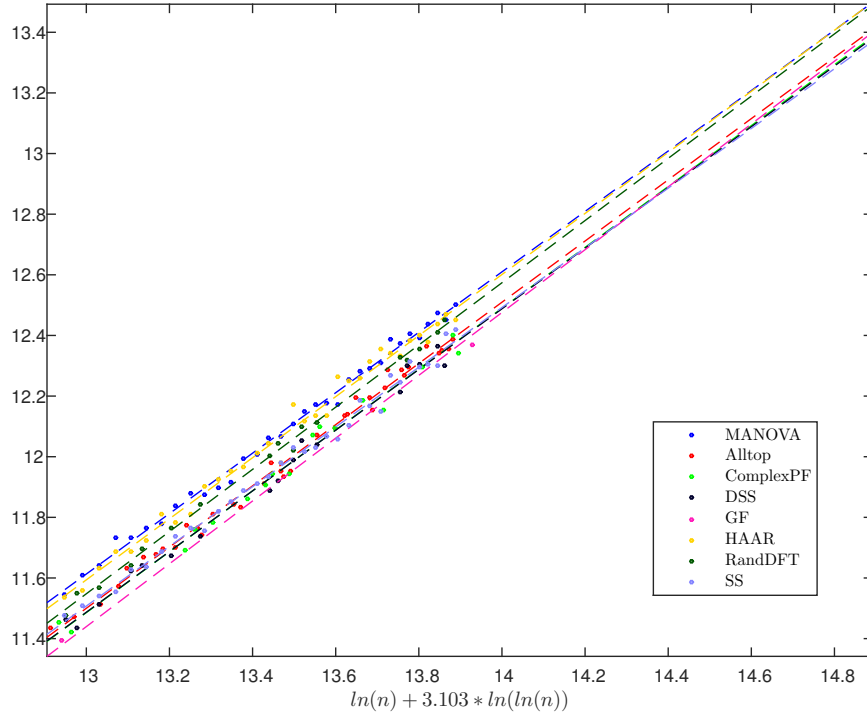

Figure 11: Test 2 for  $\Psi_{min}$ , complex frames  $\gamma = 0.5$  and  $\beta = 0.8$ . Plot shows  $-\ln \mathbb{E}_{K_n}(\Delta_{\Psi}(X_{K_n}^{(n)}; n, m_n, k_n)^2)$

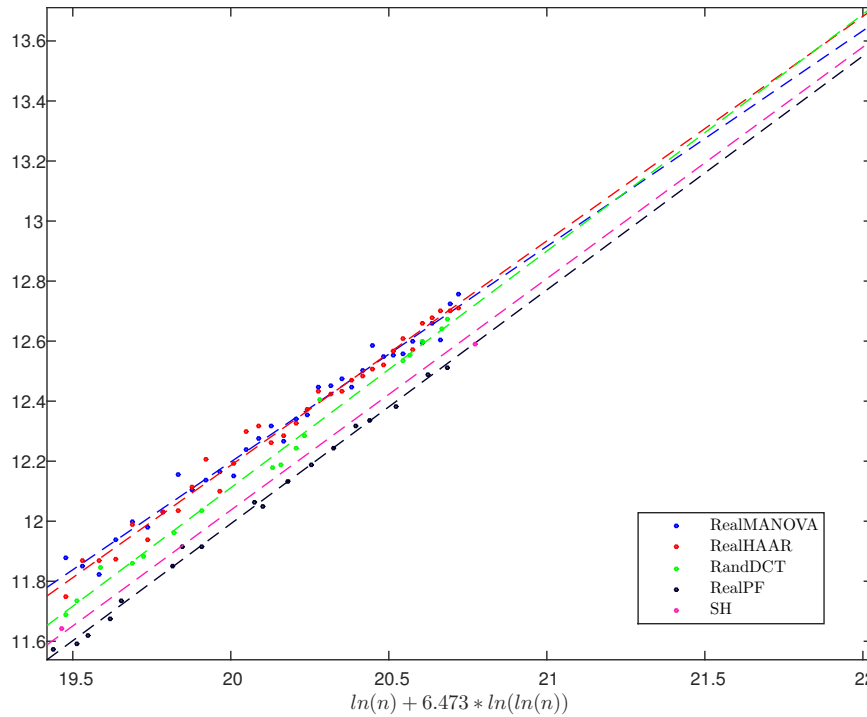

Figure 12: Test 2 for  $\Psi_{min}$ , real frames  $\gamma = 0.5$  and  $\beta = 0.8$ . Plot shows  $-\ln \mathbb{E}_{K_n}(\Delta_{\Psi}(X_{K_n}^{(n)}; n, m_n, k_n)^2)$

| Frame      | $R^2$   | $\hat{b}$ | $SE(\hat{b})$ | p-value<br>$b = b_{MANOVA}$ |
|------------|---------|-----------|---------------|-----------------------------|
| MANOVA     | 0.99436 | 0.99666   | 0.01349       | 1                           |
| DSS        | 0.99116 | 1.00093   | 0.02441       | 0.87915                     |
| GF         | 0.99917 | 1.03613   | 0.02984       | 0.23693                     |
| ComplexPF  | 0.98832 | 1.00403   | 0.02818       | 0.81466                     |
| Alltop     | 0.99218 | 1.00950   | 0.01515       | 0.52890                     |
| SS         | 0.99180 | 0.98459   | 0.01608       | 0.56697                     |
| HAAR       | 0.98749 | 1.00713   | 0.02036       | 0.66982                     |
| RandDFT    | 0.99683 | 1.02591   | 0.01494       | 0.15296                     |
| RealMANOVA | 0.98138 | 0.71823   | 0.01777       | 1                           |
| RealPF     | 0.99691 | 0.77915   | 0.01084       | 0.00527                     |
| SH         | 0.99861 | 0.77139   | 0.02873       | 0.12540                     |
| RealHAAR   | 0.98525 | 0.74799   | 0.01644       | 0.22362                     |
| RandDCT    | 0.99177 | 0.78872   | 0.01855       | 0.00862                     |

Table 7: Results of Test 2 for  $\Psi_{min}$ ,  $\gamma = 0.5$  and  $\beta = 0.8$

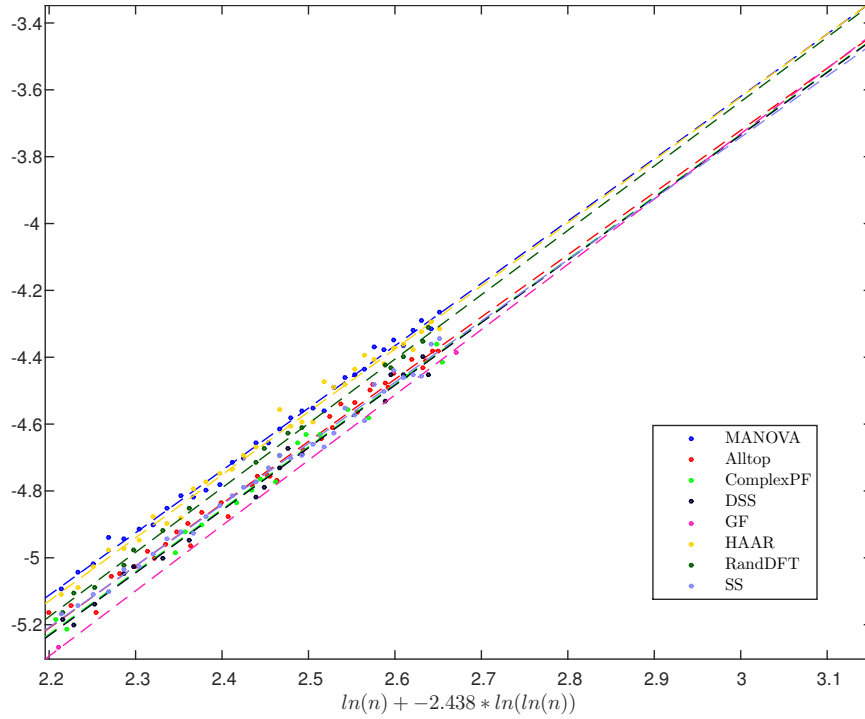

Figure 13: Test 2 for  $\Psi_{cond}$ , complex frames  $\gamma = 0.5$  and  $\beta = 0.8$ . Plot shows  $-\ln \mathbb{E}_{K_n}(\Delta_{\Psi}(X_{K_n}^{(n)}; n, m_n, k_n)^2)$

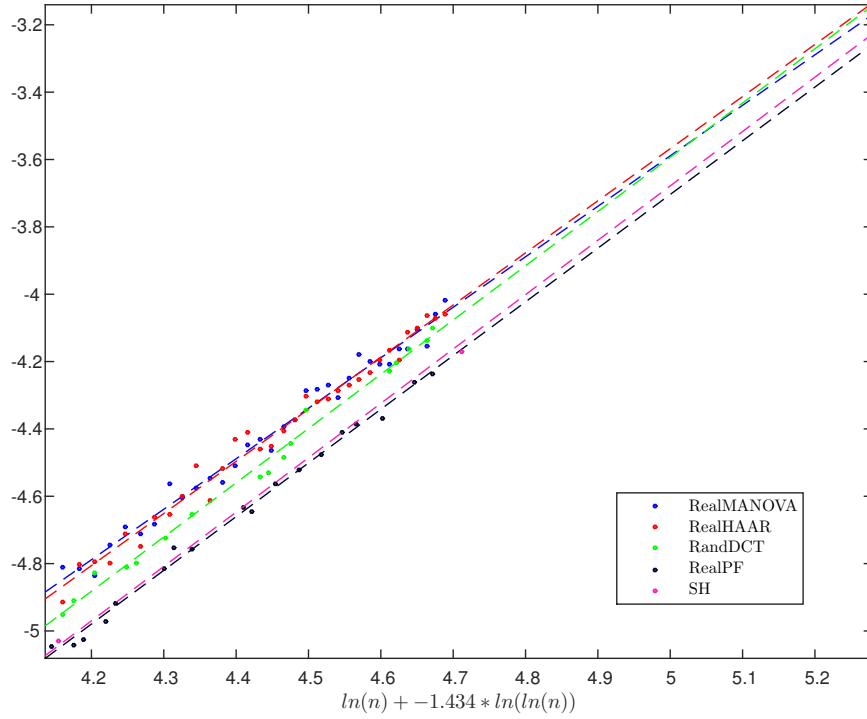

Figure 14: Test 2 for  $\Psi_{cond}$ , real frames  $\gamma = 0.5$  and  $\beta = 0.8$ . Plot shows  $-\ln \mathbb{E}_{K_n}(\Delta_{\Psi}(X_{K_n}^{(n)}; n, m_n, k_n)^2)$

| Frame      | $R^2$   | $\hat{b}$ | $SE(\hat{b})$ | p-value<br>$b = b_{MANOVA}$ |
|------------|---------|-----------|---------------|-----------------------------|
| MANOVA     | 0.99429 | 1.86502   | 0.02538       | 1                           |
| DSS        | 0.99123 | 1.87094   | 0.04544       | 0.91001                     |
| GF         | 0.99984 | 1.95342   | 0.02496       | 0.01845                     |
| ComplexPF  | 0.98754 | 1.86902   | 0.05420       | 0.94707                     |
| Alltop     | 0.98888 | 1.86134   | 0.03337       | 0.93033                     |
| SS         | 0.99138 | 1.83232   | 0.03068       | 0.41458                     |
| HAAR       | 0.98582 | 1.88372   | 0.04057       | 0.69736                     |
| RandDFT    | 0.99690 | 1.92584   | 0.02771       | 0.11237                     |
| RealMANOVA | 0.98180 | 1.49940   | 0.03667       | 1                           |
| RealPF     | 0.99496 | 1.59459   | 0.02836       | 0.04560                     |
| SH         | 0.99946 | 1.61454   | 0.03762       | 0.03579                     |
| RealHAAR   | 0.98343 | 1.54766   | 0.03608       | 0.35181                     |
| RandDCT    | 0.99159 | 1.61102   | 0.03832       | 0.04079                     |

Table 8: Results of Test 2 for  $\Psi_{cond}$ ,  $\gamma = 0.5$  and  $\beta = 0.8$

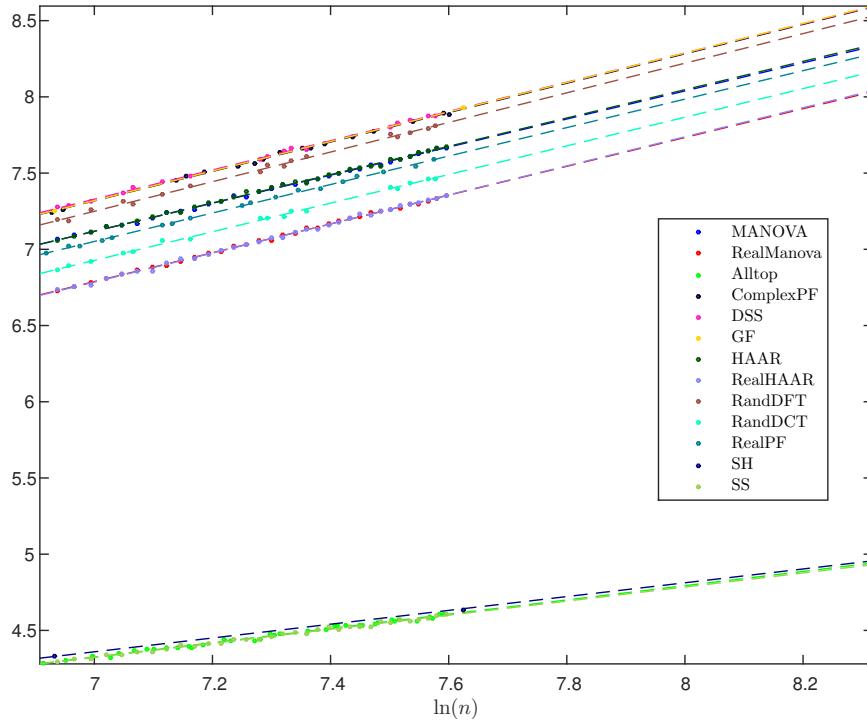

Figure 15: Test 1 for  $\gamma = 0.5$  and  $\beta = 0.6$ . Plot shows  $-\frac{1}{2} \ln \text{Var}_{K_n}(\Delta_{KS}(X_{K_n}^{(n)}; n, m_n, k_n))$  over  $\ln(n)$ .

| Frame      | $R^2$   | $\hat{b}$ | $SE(\hat{b})$ | p-value<br>$b = b_{MANOVA}$ |
|------------|---------|-----------|---------------|-----------------------------|
| MANOVA     | 0.99814 | 0.92084   | 0.00713       | 1                           |
| DSS        | 0.99860 | 0.95890   | 0.00926       | 0.00212                     |
| GF         | 0.99999 | 0.96831   | 0.00290       | 6.6980e-07                  |
| ComplexPF  | 0.99819 | 0.96451   | 0.01061       | 0.00134                     |
| Alltop     | 0.99015 | 0.46833   | 0.00790       | 1.0779e-49                  |
| SS         | 0.99240 | 0.46151   | 0.00725       | 3.7871e-49                  |
| HAAR       | 0.99770 | 0.92871   | 0.00801       | 0.46534                     |
| RandDFT    | 0.99569 | 0.97151   | 0.01651       | 0.00709                     |
| RealMANOVA | 0.99857 | 0.94506   | 0.00642       | 1                           |
| RealPF     | 0.99858 | 0.93376   | 0.00879       | 0.30465                     |
| SH         | 0.99951 | 0.45280   | 0.01000       | 2.2473e-29                  |
| RealHAAR   | 0.99798 | 0.95281   | 0.00771       | 0.44290                     |
| RandDCT    | 0.99743 | 0.93887   | 0.01230       | 0.65766                     |

Table 9: Results of Test 1 for  $\gamma = 0.5$  and  $\beta = 0.6$ .

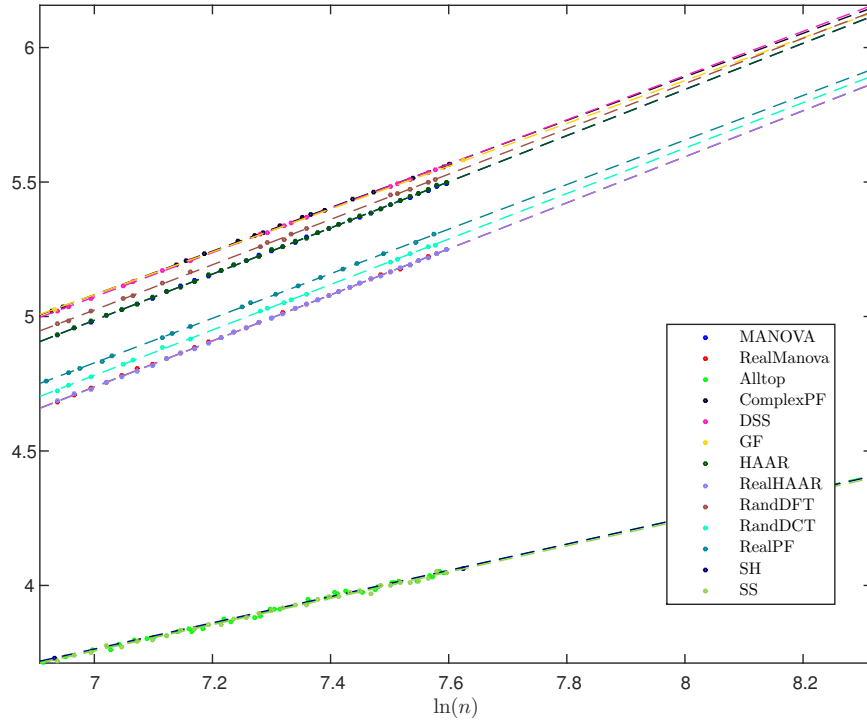

Figure 16: Test 1 for  $\gamma = 0.5$  and  $\beta = 0.6$ . Plot shows  $-\frac{1}{2} \ln \mathbb{E}_{K_n}(\Delta_{KS}(X_{K_n}^{(n)}; n, m_n, k_n)^2)$  over  $\ln(n)$ .

| Frame      | $R^2$   | $\hat{b}$ | $SE(\hat{b})$ | p-value<br>$b = b_{MANOVA}$ |
|------------|---------|-----------|---------------|-----------------------------|
| MANOVA     | 0.99996 | 0.85806   | 0.00092       | 1                           |
| DSS        | 0.99997 | 0.82286   | 0.00120       | 4.3933e-27                  |
| GF         | 0.99990 | 0.79630   | 0.00779       | 5.5243e-09                  |
| ComplexPF  | 0.99992 | 0.81016   | 0.00193       | 2.0014e-26                  |
| Alltop     | 0.99495 | 0.49409   | 0.00595       | 1.6481e-59                  |
| SS         | 0.99599 | 0.48823   | 0.00557       | 5.6720e-59                  |
| HAAR       | 0.99990 | 0.85853   | 0.00154       | 0.79203                     |
| RandDFT    | 0.99969 | 0.84205   | 0.00380       | 1.7174e-04                  |
| RealMANOVA | 0.99992 | 0.85550   | 0.00134       | 1                           |
| RealPF     | 0.99994 | 0.82865   | 0.00164       | 8.3751e-17                  |
| SH         | 0.99994 | 0.48765   | 0.00380       | 2.9140e-40                  |
| RealHAAR   | 0.99983 | 0.85717   | 0.00204       | 0.49573                     |
| RandDCT    | 0.99990 | 0.84525   | 0.00216       | 2.0095e-04                  |

Table 10: Results of Test 1 (MSE) for  $\gamma = 0.5$  and  $\beta = 0.6$ .

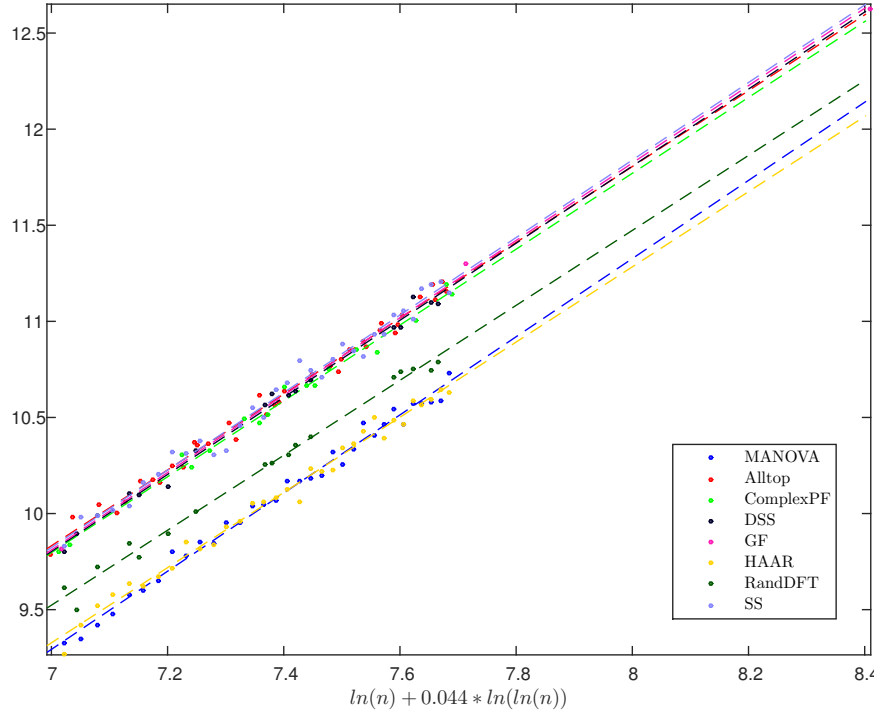

Figure 17: Test 2 for  $\Psi_{AC}$ , complex frames  $\gamma = 0.5$  and  $\beta = 0.6$ . Plot shows  $-\ln \mathbb{E}_{K_n}(\Delta_{\Psi}(X_{K_n}^{(n)}; n, m_n, k_n)^2)$

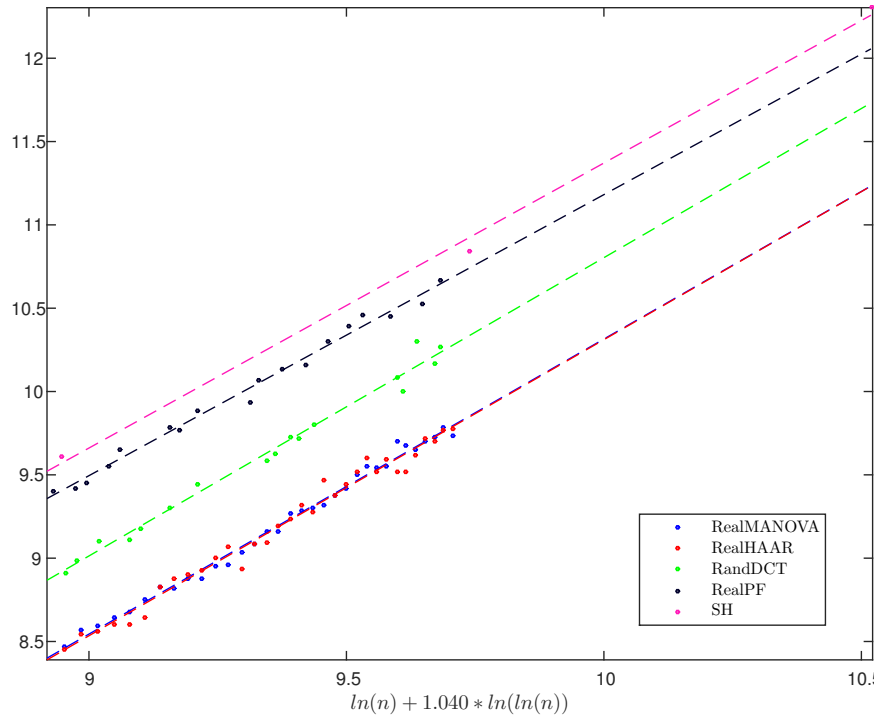

Figure 18: Test 2 for  $\Psi_{AC}$ , real frames  $\gamma = 0.5$  and  $\beta = 0.6$ . Plot shows  $-\ln \mathbb{E}_{K_n}(\Delta_{\Psi}(X_{K_n}^{(n)}; n, m_n, k_n)^2)$

| Frame      | $R^2$   | $\hat{b}$ | $SE(\hat{b})$ | p-value<br>$b = b_{MANOVA}$ |
|------------|---------|-----------|---------------|-----------------------------|
| MANOVA     | 0.99027 | 2.03344   | 0.03620       | 1                           |
| DSS        | 0.99321 | 2.00503   | 0.04279       | 0.61461                     |
| GF         | 0.99904 | 2.01301   | 0.06244       | 0.77891                     |
| ComplexPF  | 0.99038 | 1.97372   | 0.05022       | 0.33972                     |
| Alltop     | 0.99020 | 1.97327   | 0.03318       | 0.22480                     |
| SS         | 0.98367 | 2.01655   | 0.04667       | 0.77587                     |
| HAAR       | 0.98704 | 1.95623   | 0.04026       | 0.15887                     |
| RandDFT    | 0.99072 | 1.95007   | 0.04874       | 0.17636                     |
| RealMANOVA | 0.99186 | 1.77068   | 0.02881       | 1                           |
| RealPF     | 0.98909 | 1.68647   | 0.04428       | 0.11761                     |
| SH         | 0.99745 | 1.71033   | 0.08648       | 0.51270                     |
| RealHAAR   | 0.98063 | 1.77667   | 0.04485       | 0.91097                     |
| RandDCT    | 0.98525 | 1.78997   | 0.05656       | 0.76255                     |

Table 11: Results of Test 2 for  $\Psi_{AC}$ ,  $\gamma = 0.5$  and  $\beta = 0.6$

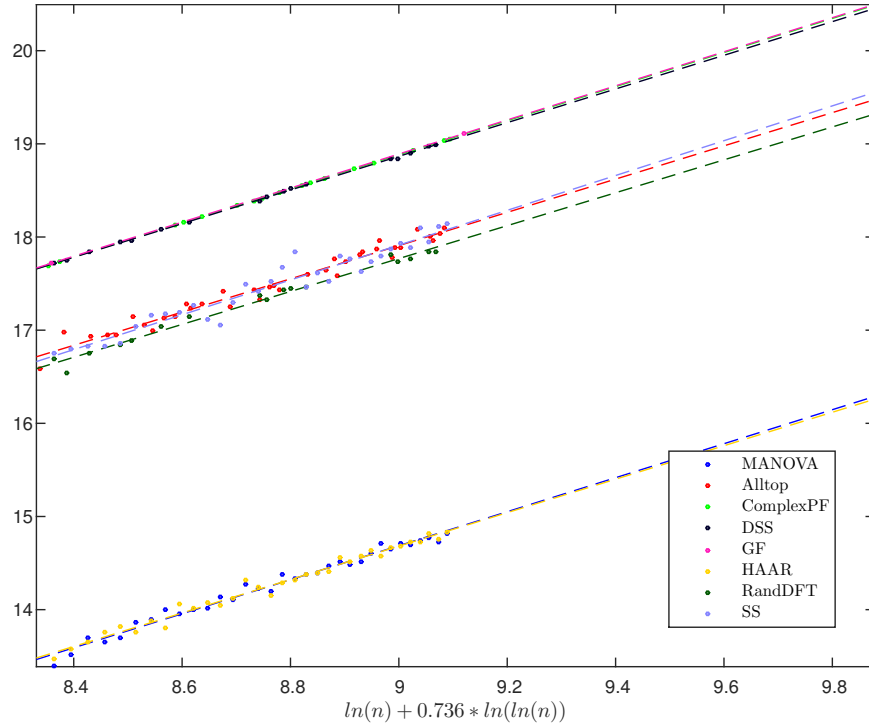

Figure 19: Test 2 for  $\Psi_{Shannon}$ , complex frames  $\gamma = 0.5$  and  $\beta = 0.6$ . Plot shows  $-\ln \mathbb{E}_{K_n}(\Delta_{\Psi}(X_{K_n}^{(n)}; n, m_n, k_n)^2)$

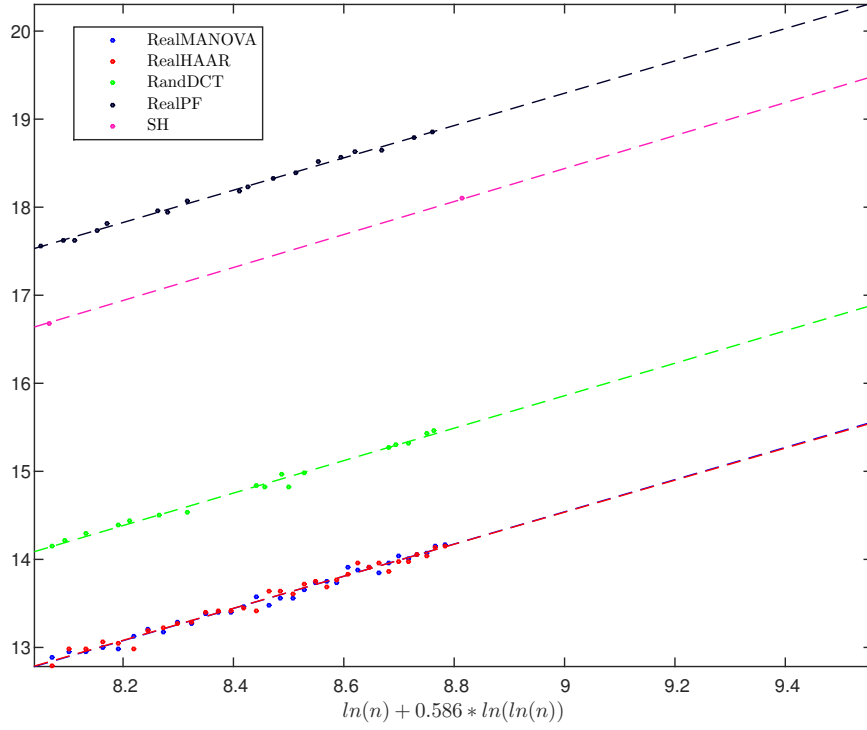

Figure 20: Test 2 for  $\Psi_{Shannon}$ , real frames  $\gamma = 0.5$  and  $\beta = 0.6$ . Plot shows  $-\ln \mathbb{E}_{K_n}(\Delta_{\Psi}(X_{K_n}^{(n)}; n, m_n, k_n)^2)$

| Frame      | $R^2$   | $\hat{b}$ | $SE(\hat{b})$ | p-value<br>$b = b_{MANOVA}$ |
|------------|---------|-----------|---------------|-----------------------------|
| MANOVA     | 0.98195 | 1.82538   | 0.04445       | 1                           |
| DSS        | 0.99945 | 1.80721   | 0.01098       | 0.69332                     |
| GF         | 1.00000 | 1.82884   | 0.00395       | 0.93869                     |
| ComplexPF  | 0.99992 | 1.82938   | 0.00435       | 0.92891                     |
| Alltop     | 0.96689 | 1.78431   | 0.05581       | 0.56685                     |
| SS         | 0.94035 | 1.86865   | 0.08453       | 0.65205                     |
| HAAR       | 0.98250 | 1.79577   | 0.04305       | 0.63396                     |
| RandDFT    | 0.98501 | 1.76630   | 0.05626       | 0.41425                     |
| RealMANOVA | 0.98863 | 1.82907   | 0.03523       | 1                           |
| RealPF     | 0.99618 | 1.83544   | 0.02843       | 0.88885                     |
| SH         | 0.99996 | 1.87300   | 0.01129       | 0.24381                     |
| RealHAAR   | 0.98176 | 1.81917   | 0.04454       | 0.86218                     |
| RandDCT    | 0.99046 | 1.84329   | 0.04671       | 0.80910                     |

Table 12: Results of Test 2 for  $\Psi_{Shannon}$ ,  $\gamma = 0.5$  and  $\beta = 0.6$



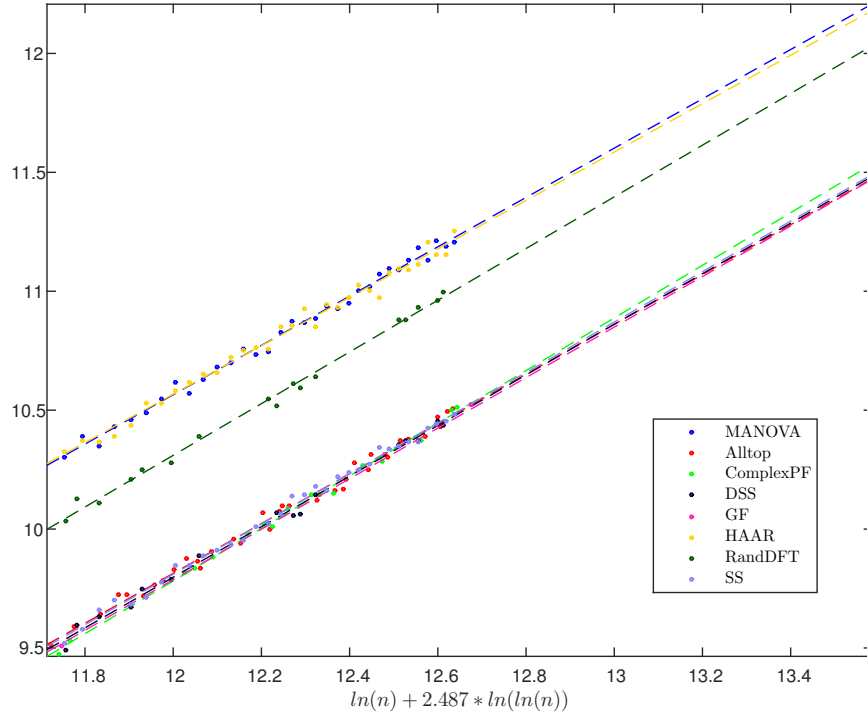

Figure 21: Test 2 for  $\Psi_{RIP}$ , complex frames  $\gamma = 0.5$  and  $\beta = 0.6$ . Plot shows  $-\ln \mathbb{E}_{K_n}(\Delta_{\Psi}(X_{K_n}^{(n)}; n, m_n, k_n)^2)$

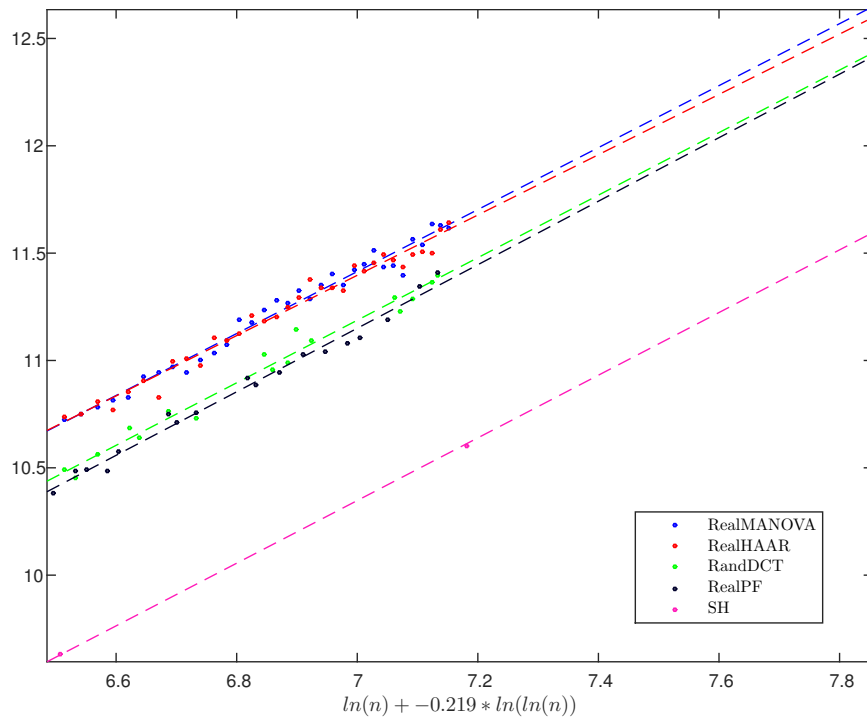

Figure 22: Test 2 for  $\Psi_{RIP}$ , real frames  $\gamma = 0.5$  and  $\beta = 0.6$ . Plot shows  $-\ln \mathbb{E}_{K_n}(\Delta_{\Psi}(X_{K_n}^{(n)}; n, m_n, k_n)^2)$

| Frame      | $R^2$   | $\hat{b}$ | $SE(\hat{b})$ | p-value<br>$b = b_{MANOVA}$ |
|------------|---------|-----------|---------------|-----------------------------|
| MANOVA     | 0.99243 | 1.03687   | 0.01627       | 1                           |
| DSS        | 0.99413 | 1.06366   | 0.02110       | 0.31982                     |
| GF         | 0.99979 | 1.06250   | 0.01522       | 0.25836                     |
| ComplexPF  | 0.99613 | 1.10638   | 0.01782       | 0.00600                     |
| Alltop     | 0.99175 | 1.04727   | 0.01614       | 0.65149                     |
| SS         | 0.99459 | 1.06078   | 0.01405       | 0.27016                     |
| HAAR       | 0.98830 | 1.01796   | 0.01989       | 0.46451                     |
| RandDFT    | 0.99482 | 1.08689   | 0.02024       | 0.06028                     |
| RealMANOVA | 0.97822 | 1.44331   | 0.03868       | 1                           |
| RealPF     | 0.98593 | 1.47974   | 0.04419       | 0.53806                     |
| SH         | 0.99996 | 1.45956   | 0.00897       | 0.68503                     |
| RealHAAR   | 0.97735 | 1.40446   | 0.03840       | 0.47866                     |
| RandDCT    | 0.97878 | 1.45677   | 0.05538       | 0.84297                     |

Table 13: Results of Test 2 for  $\Psi_{RIP}$ ,  $\gamma = 0.5$  and  $\beta = 0.6$

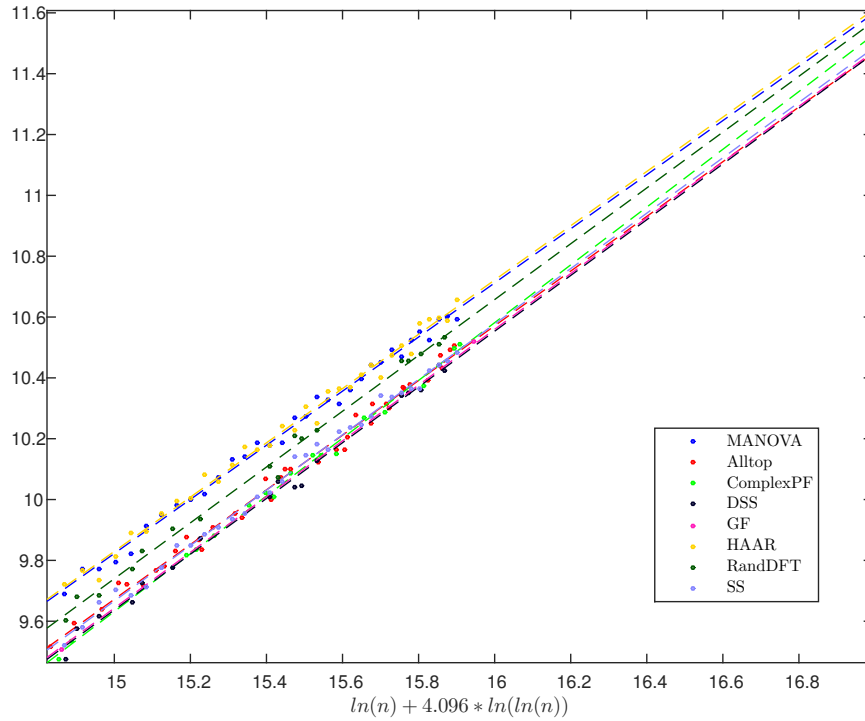

Figure 23: Test 2 for  $\Psi_{max}$ , complex frames  $\gamma = 0.5$  and  $\beta = 0.6$ . Plot shows  $-\ln \mathbb{E}_{K_n}(\Delta_{\Psi}(X_{K_n}^{(n)}; n, m_n, k_n)^2)$

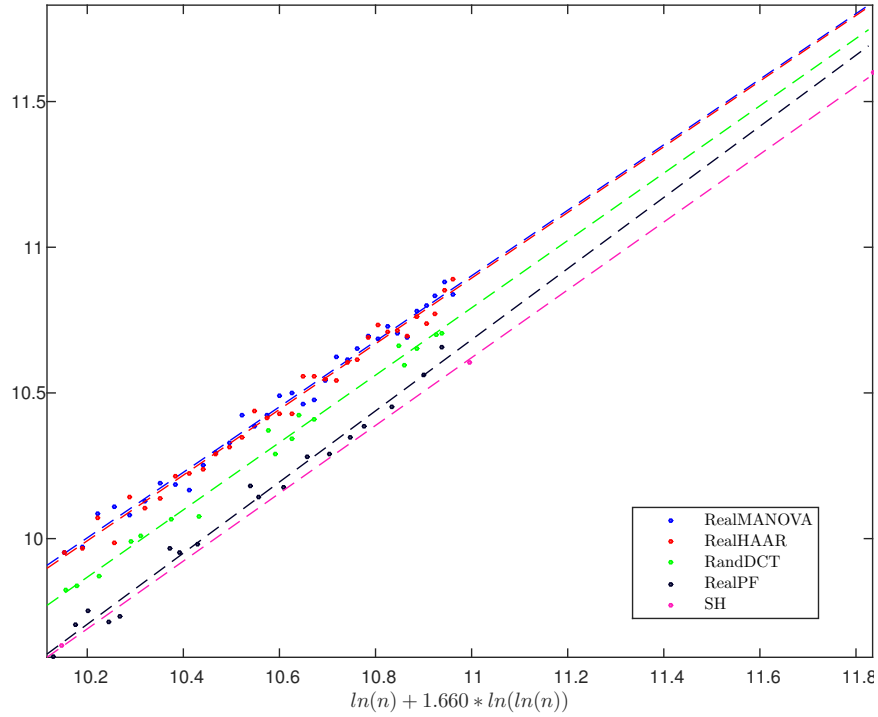

Figure 24: Test 2 for  $\Psi_{max}$ , real frames  $\gamma = 0.5$  and  $\beta = 0.6$ . Plot shows  $-\ln \mathbb{E}_{K_n}(\Delta_\Psi(X_{K_n}^{(n)}; n, m_n, k_n)^2)$

| Frame      | $R^2$   | $\hat{b}$ | $SE(\hat{b})$ | p-value<br>$b = b_{MANOVA}$ |
|------------|---------|-----------|---------------|-----------------------------|
| MANOVA     | 0.99377 | 0.88948   | 0.01265       | 1                           |
| DSS        | 0.99433 | 0.91641   | 0.01786       | 0.22480                     |
| GF         | 0.99987 | 0.91641   | 0.01063       | 0.11286                     |
| ComplexPF  | 0.99613 | 0.94975   | 0.01528       | 0.00391                     |
| Alltop     | 0.99170 | 0.89908   | 0.01391       | 0.61136                     |
| SS         | 0.99463 | 0.91071   | 0.01202       | 0.22818                     |
| HAAR       | 0.99114 | 0.89219   | 0.01515       | 0.89136                     |
| RandDFT    | 0.99454 | 0.91759   | 0.01756       | 0.20040                     |
| RealMANOVA | 0.98572 | 1.12423   | 0.02431       | 1                           |
| RealPF     | 0.98712 | 1.22068   | 0.03485       | 0.02784                     |
| SH         | 0.99986 | 1.16349   | 0.01354       | 0.16777                     |
| RealHAAR   | 0.98431 | 1.12688   | 0.02555       | 0.94029                     |
| RandDCT    | 0.98969 | 1.15548   | 0.03045       | 0.42663                     |

Table 14: Results of Test 2 for  $\Psi_{max}$ ,  $\gamma = 0.5$  and  $\beta = 0.6$

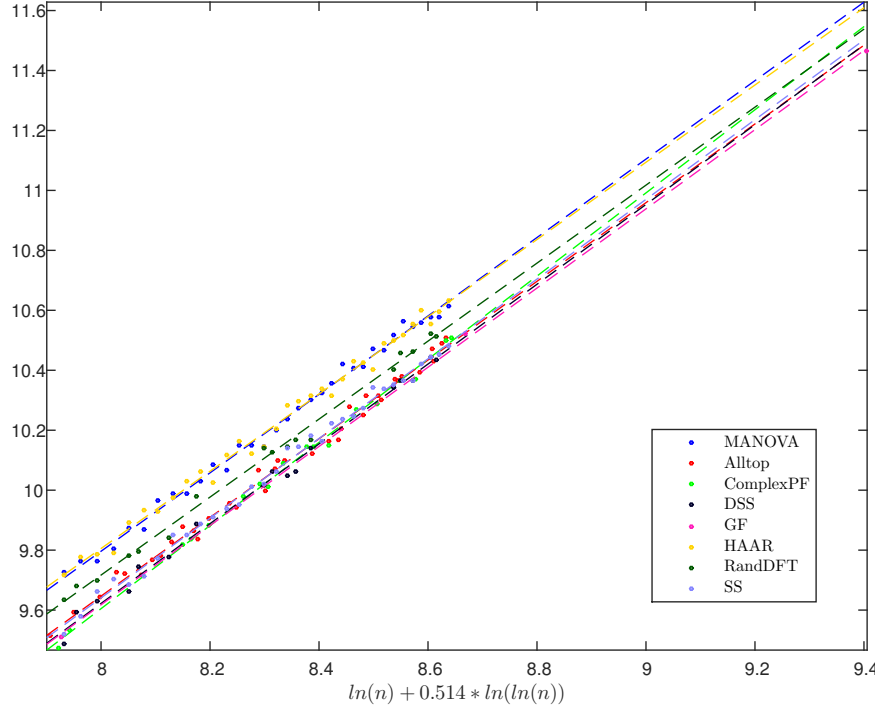

Figure 25: Test 2 for  $\Psi_{min}$ , complex frames  $\gamma = 0.5$  and  $\beta = 0.6$ . Plot shows  $-\ln \mathbb{E}_{K_n}(\Delta_{\Psi}(X_{K_n}^{(n)}; n, m_n, k_n)^2)$

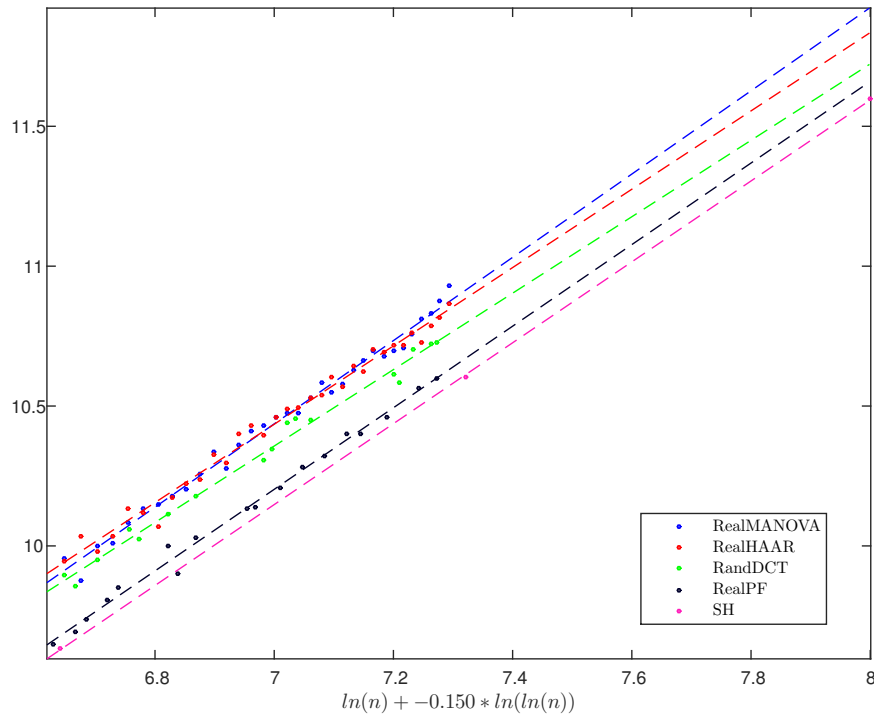

Figure 26: Test 2 for  $\Psi_{min}$ , real frames  $\gamma = 0.5$  and  $\beta = 0.6$ . Plot shows  $-\ln \mathbb{E}_{K_n}(\Delta_{\Psi}(X_{K_n}^{(n)}; n, m_n, k_n)^2)$

| Frame      | $R^2$   | $\hat{b}$ | $SE(\hat{b})$ | p-value<br>$b = b_{MANOVA}$ |
|------------|---------|-----------|---------------|-----------------------------|
| MANOVA     | 0.99411 | 1.30821   | 0.01808       | 1                           |
| DSS        | 0.99357 | 1.33096   | 0.02766       | 0.49466                     |
| GF         | 0.99963 | 1.32070   | 0.02528       | 0.69037                     |
| ComplexPF  | 0.99610 | 1.38691   | 0.02241       | 0.00888                     |
| Alltop     | 0.99185 | 1.31263   | 0.02011       | 0.87082                     |
| SS         | 0.99453 | 1.32947   | 0.01771       | 0.40430                     |
| HAAR       | 0.99080 | 1.28847   | 0.02230       | 0.49421                     |
| RandDFT    | 0.99424 | 1.30077   | 0.02556       | 0.81312                     |
| RealMANOVA | 0.98906 | 1.48832   | 0.02812       | 1                           |
| RealPF     | 0.99292 | 1.45809   | 0.03077       | 0.47184                     |
| SH         | 0.99996 | 1.44606   | 0.00925       | 0.16305                     |
| RealHAAR   | 0.98646 | 1.40012   | 0.02947       | 0.03420                     |
| RandDCT    | 0.98944 | 1.36601   | 0.03643       | 0.01078                     |

Table 15: Results of Test 2 for  $\Psi_{min}$ ,  $\gamma = 0.5$  and  $\beta = 0.6$

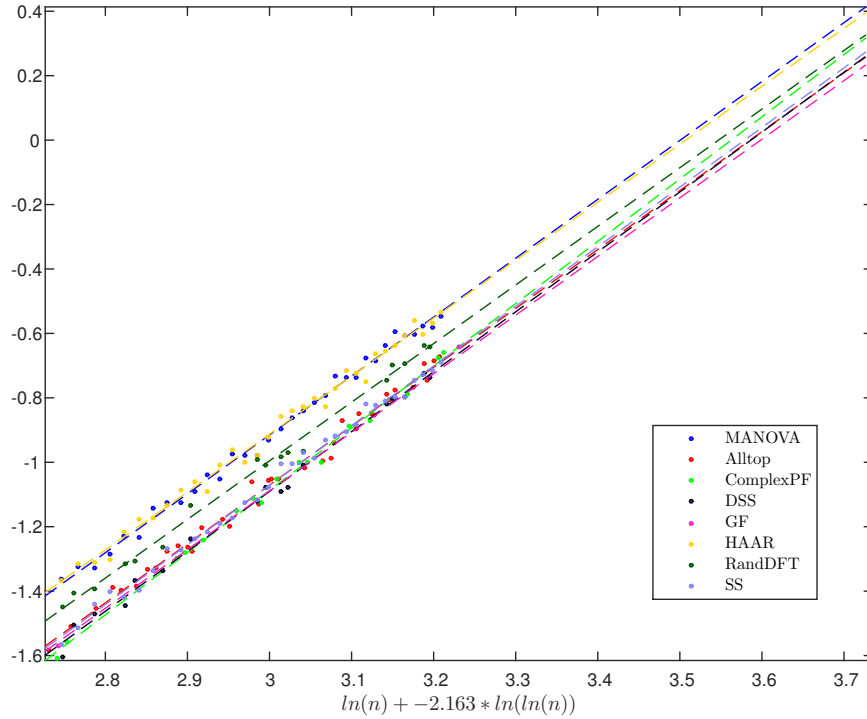

Figure 27: Test 2 for  $\Psi_{cond}$ , complex frames  $\gamma = 0.5$  and  $\beta = 0.6$ . Plot shows  $-\ln \mathbb{E}_{K_n}(\Delta_{\Psi}(X_{K_n}^{(n)}; n, m_n, k_n)^2)$

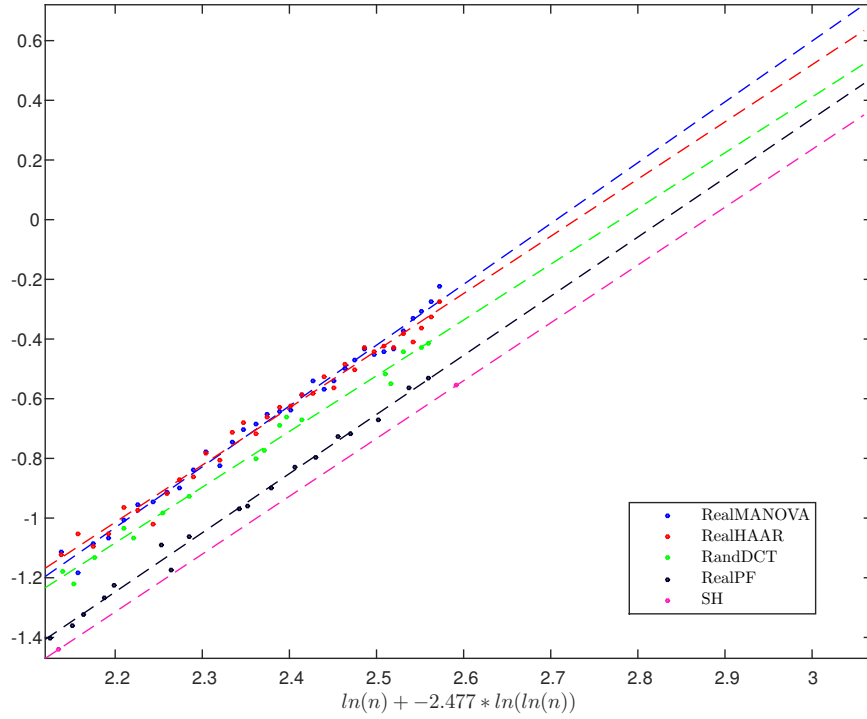

Figure 28: Test 2 for  $\Psi_{cond}$ , real frames  $\gamma = 0.5$  and  $\beta = 0.6$ . Plot shows  $-\ln \mathbb{E}_{K_n}(\Delta_{\Psi}(X_{K_n}^{(n)}; n, m_n, k_n)^2)$

| Frame      | $R^2$   | $\hat{b}$ | $SE(\hat{b})$ | p-value<br>$b = b_{MANOVA}$ |
|------------|---------|-----------|---------------|-----------------------------|
| MANOVA     | 0.99441 | 1.82815   | 0.02462       | 1                           |
| DSS        | 0.99352 | 1.85919   | 0.03875       | 0.50234                     |
| GF         | 0.99932 | 1.81990   | 0.04756       | 0.87861                     |
| ComplexPF  | 0.99606 | 1.93254   | 0.03138       | 0.01196                     |
| Alltop     | 0.99113 | 1.82833   | 0.02923       | 0.99618                     |
| SS         | 0.99447 | 1.85077   | 0.02478       | 0.51955                     |
| HAAR       | 0.99081 | 1.79953   | 0.03112       | 0.47360                     |
| RandDFT    | 0.99426 | 1.81952   | 0.03569       | 0.84323                     |
| RealMANOVA | 0.98971 | 2.03829   | 0.03733       | 1                           |
| RealPF     | 0.99382 | 1.98193   | 0.03907       | 0.30225                     |
| SH         | 1.00000 | 1.93739   | 0.00213       | 0.01102                     |
| RealHAAR   | 0.98568 | 1.91682   | 0.04149       | 0.03334                     |
| RandDCT    | 0.98911 | 1.86786   | 0.05060       | 0.00941                     |

Table 16: Results of Test 2 for  $\Psi_{cond}$ ,  $\gamma = 0.5$  and  $\beta = 0.6$

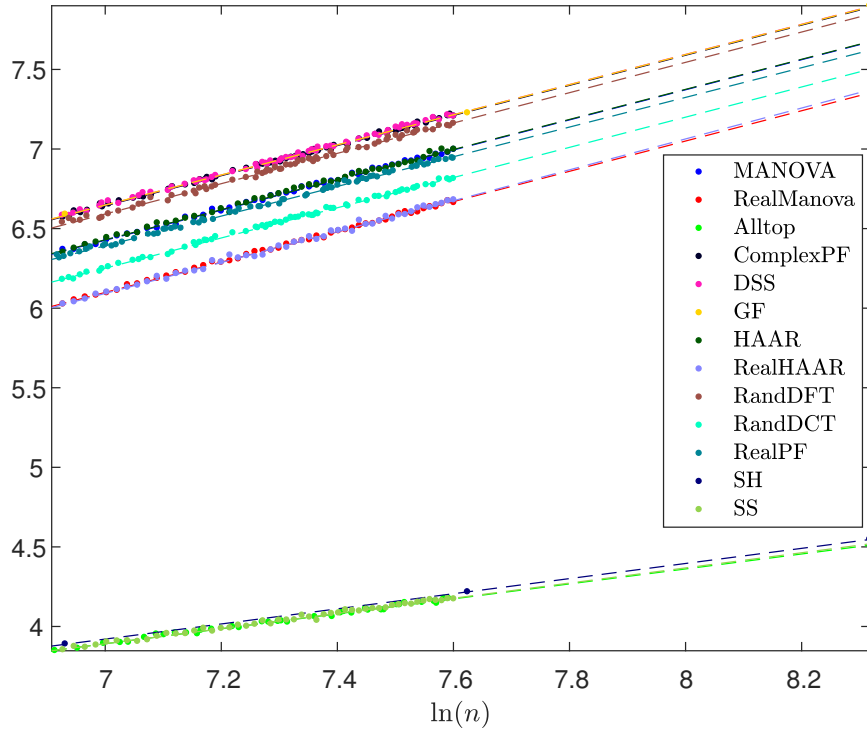

Figure 29: Test 1 for  $\gamma = 0.5$  and  $\beta = 0.3$ . Plot shows  $-\frac{1}{2} \ln \text{Var}_{K_n}(\Delta_{KS}(X_{K_n}^{(n)}; n, m_n, k_n))$  over  $\ln(n)$ .

| Frame      | $R^2$   | $\hat{b}$ | $SE(\hat{b})$ | p-value<br>$b = b_{MANOVA}$ |
|------------|---------|-----------|---------------|-----------------------------|
| MANOVA     | 0.99804 | 0.94562   | 0.00604       | 1                           |
| DSS        | 0.99751 | 0.94706   | 0.00583       | 0.86402                     |
| GF         | 0.99973 | 0.94566   | 0.01560       | 0.99790                     |
| ComplexPF  | 0.99808 | 0.94620   | 0.00511       | 0.94130                     |
| Alltop     | 0.99125 | 0.47008   | 0.00747       | 2.1545e-63                  |
| SS         | 0.99264 | 0.47654   | 0.00592       | 1.0558e-74                  |
| HAAR       | 0.99662 | 0.94502   | 0.00794       | 0.95233                     |
| RandDFT    | 0.99593 | 0.95281   | 0.00750       | 0.45698                     |
| RealMANOVA | 0.99861 | 0.95142   | 0.00512       | 1                           |
| RealPF     | 0.99824 | 0.93244   | 0.00485       | 0.00822                     |
| SH         | 0.99999 | 0.47509   | 0.00123       | 3.4170e-56                  |
| RealHAAR   | 0.99574 | 0.97072   | 0.00917       | 0.06915                     |
| RandDCT    | 0.99807 | 0.94876   | 0.00513       | 0.71436                     |

Table 17: Results of Test 1 for  $\gamma = 0.5$  and  $\beta = 0.3$ .

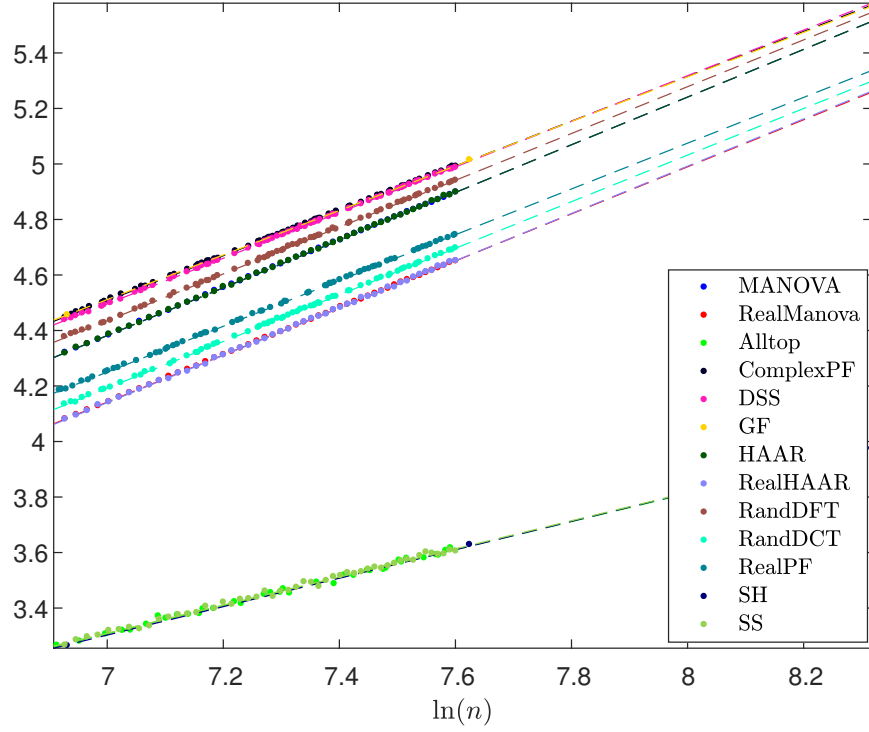

Figure 30: Test 1 for  $\gamma = 0.5$  and  $\beta = 0.3$ . Plot shows  $-\frac{1}{2} \ln \mathbb{E}_{K_n}(\Delta_{KS}(X_{K_n}^{(n)}; n, m_n, k_n)^2)$  over  $\ln(n)$ .

| Frame      | $R^2$   | $\hat{b}$ | $SE(\hat{b})$ | p-value<br>$b = b_{MANOVA}$ |
|------------|---------|-----------|---------------|-----------------------------|
| MANOVA     | 0.99996 | 0.85923   | 0.00078       | 1                           |
| DSS        | 0.99988 | 0.82205   | 0.00111       | 5.7008e-52                  |
| GF         | 0.99999 | 0.80192   | 0.00253       | 1.0432e-26                  |
| ComplexPF  | 0.99990 | 0.80801   | 0.00102       | 7.0584e-69                  |
| Alltop     | 0.99484 | 0.50500   | 0.00615       | 2.0456e-68                  |
| SS         | 0.99539 | 0.50645   | 0.00498       | 3.1506e-84                  |
| HAAR       | 0.99986 | 0.85892   | 0.00146       | 0.85431                     |
| RandDFT    | 0.99977 | 0.84332   | 0.00156       | 3.0710e-15                  |
| RealMANOVA | 0.99995 | 0.84773   | 0.00086       | 1                           |
| RealPF     | 0.99989 | 0.82479   | 0.00108       | 4.7494e-32                  |
| SH         | 0.99980 | 0.51202   | 0.00718       | 3.6278e-42                  |
| RealHAAR   | 0.99968 | 0.85192   | 0.00221       | 0.08066                     |
| RandDCT    | 0.99983 | 0.83940   | 0.00133       | 7.4371e-07                  |

Table 18: Results of Test 1 (MSE) for  $\gamma = 0.5$  and  $\beta = 0.3$ .



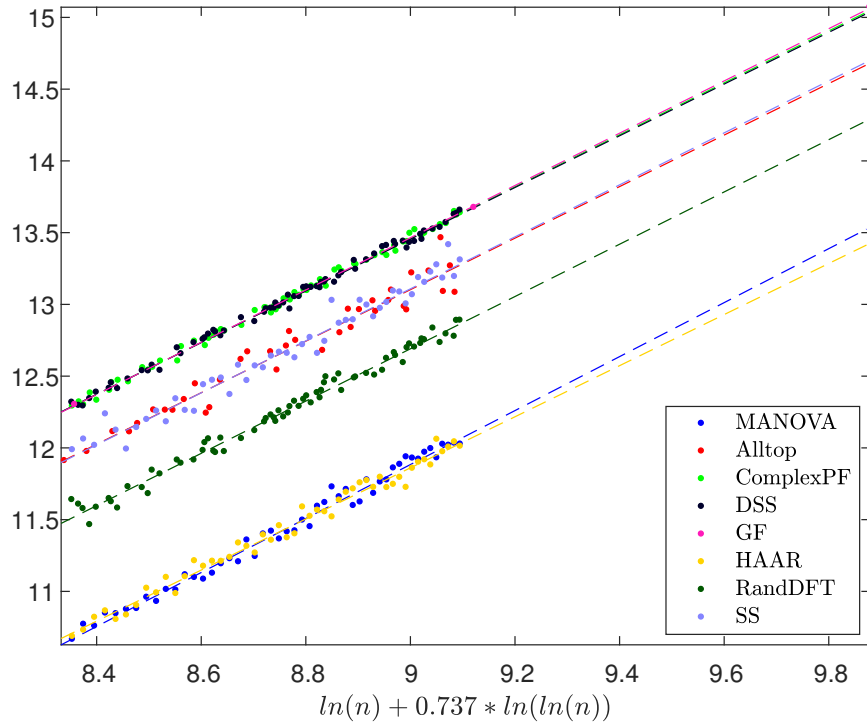

Figure 31: Test 2 for  $\Psi_{AC}$ , complex frames  $\gamma = 0.5$  and  $\beta = 0.3$ . Plot shows  $-\ln \mathbb{E}_{K_n}(\Delta_\Psi(X_{K_n}^{(n)}; n, m_n, k_n)^2)$

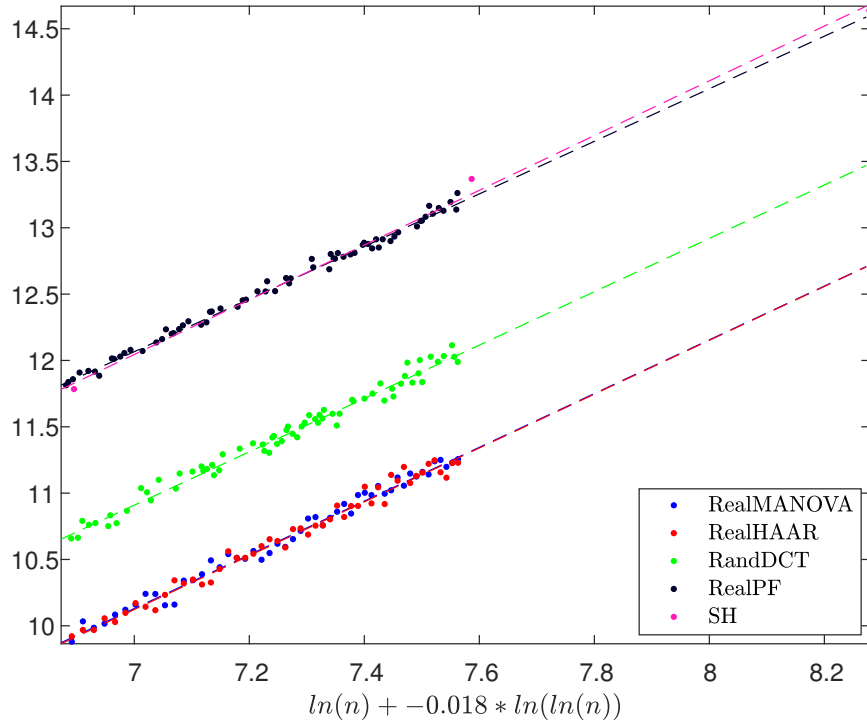

Figure 32: Test 2 for  $\Psi_{AC}$ , real frames  $\gamma = 0.5$  and  $\beta = 0.3$ . Plot shows  $-\ln \mathbb{E}_{K_n}(\Delta_\Psi(X_{K_n}^{(n)}; n, m_n, k_n)^2)$

| Frame      | $R^2$   | $\hat{b}$ | $SE(\hat{b})$ | p-value<br>$b = b_{MANOVA}$ |
|------------|---------|-----------|---------------|-----------------------------|
| MANOVA     | 0.98718 | 1.88076   | 0.03094       | 1                           |
| DSS        | 0.99544 | 1.80171   | 0.01500       | 0.02333                     |
| GF         | 0.99995 | 1.82112   | 0.01321       | 0.08250                     |
| ComplexPF  | 0.99635 | 1.80951   | 0.01349       | 0.03695                     |
| Alltop     | 0.94870 | 1.79549   | 0.07057       | 0.27168                     |
| SS         | 0.96730 | 1.81163   | 0.04808       | 0.22961                     |
| HAAR       | 0.98368 | 1.78037   | 0.03310       | 0.02907                     |
| RandDFT    | 0.98579 | 1.82179   | 0.02692       | 0.15326                     |
| RealMANOVA | 0.98675 | 2.02493   | 0.03387       | 1                           |
| RealPF     | 0.99378 | 1.98183   | 0.01944       | 0.27211                     |
| SH         | 0.99595 | 2.06310   | 0.13161       | 0.78000                     |
| RealHAAR   | 0.98333 | 2.02932   | 0.03814       | 0.93170                     |
| RandDCT    | 0.98191 | 2.01123   | 0.03361       | 0.77441                     |

Table 19: Results of Test 2 for  $\Psi_{AC}$ ,  $\gamma = 0.5$  and  $\beta = 0.3$

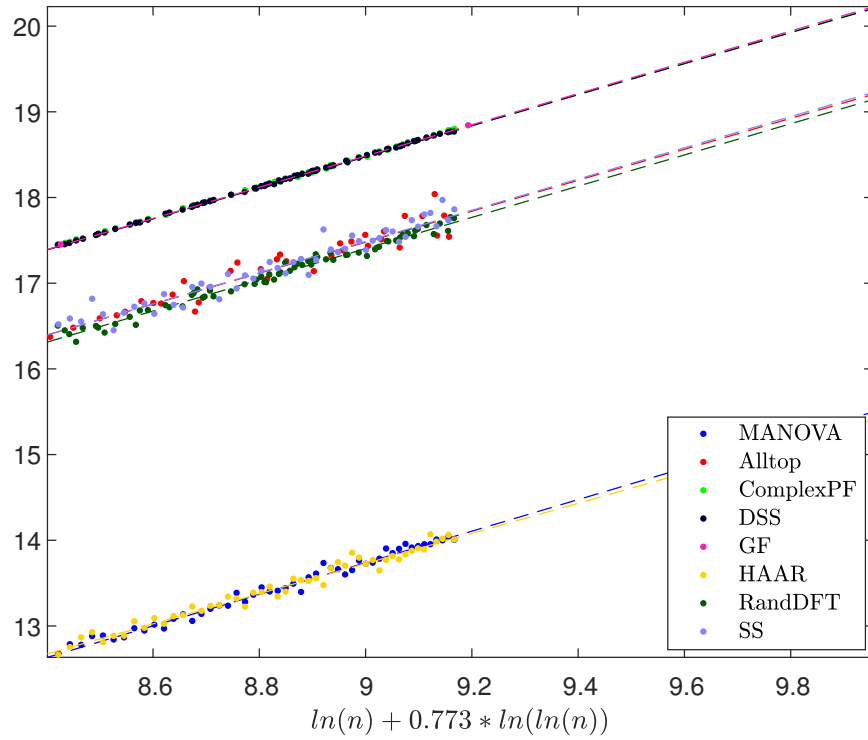

Figure 33: Test 2 for  $\Psi_{Shannon}$ , complex frames  $\gamma = 0.5$  and  $\beta = 0.3$ . Plot shows  $-\ln \mathbb{E}_{K_n} (\Delta_{\Psi}(X_{K_n}^{(n)}; n, m_n, k_n)^2)$

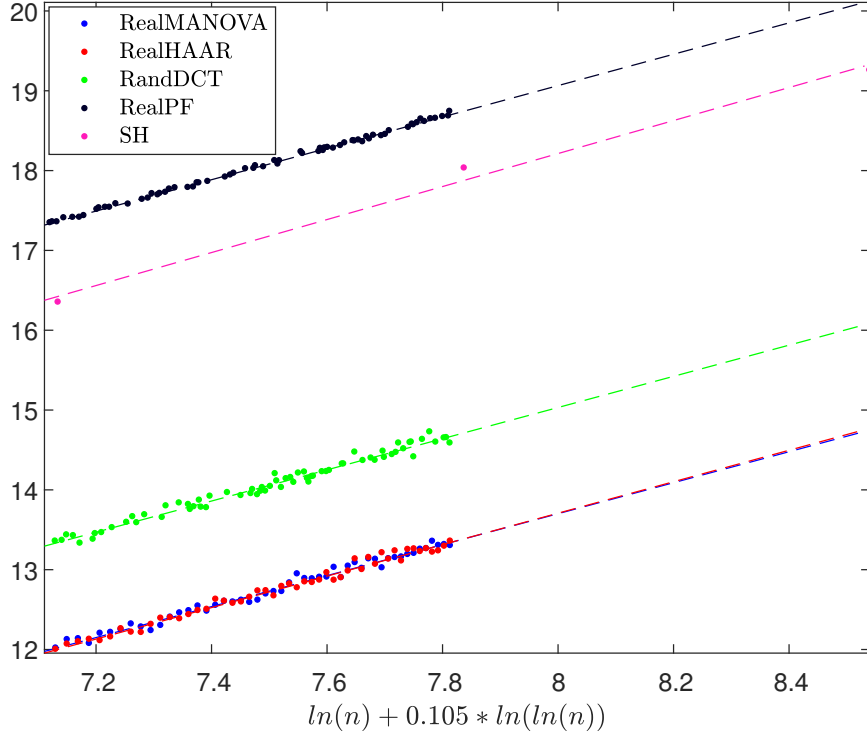

Figure 34: Test 2 for  $\Psi_{Shannon}$ , real frames  $\gamma = 0.5$  and  $\beta = 0.3$ . Plot shows  $-\ln \mathbb{E}_{K_n}(\Delta_{\Psi}(X_{K_n}^{(n)}; n, m_n, k_n)^2)$

| Frame      | $R^2$   | $\hat{b}$ | $SE(\hat{b})$ | p-value<br>$b = b_{MANOVA}$ |
|------------|---------|-----------|---------------|-----------------------------|
| MANOVA     | 0.98545 | 1.84293   | 0.03232       | 1                           |
| DSS        | 0.99970 | 1.81175   | 0.00387       | 0.34009                     |
| GF         | 0.99999 | 1.82300   | 0.00555       | 0.54620                     |
| ComplexPF  | 0.99961 | 1.81331   | 0.00441       | 0.36582                     |
| Alltop     | 0.91656 | 1.80667   | 0.09214       | 0.71129                     |
| SS         | 0.93825 | 1.82241   | 0.06748       | 0.78446                     |
| HAAR       | 0.97525 | 1.75883   | 0.04044       | 0.10755                     |
| RandDFT    | 0.98262 | 1.82136   | 0.02982       | 0.62471                     |
| RealMANOVA | 0.98551 | 1.94022   | 0.03395       | 1                           |
| RealPF     | 0.99790 | 1.96483   | 0.01119       | 0.49266                     |
| SH         | 0.99193 | 2.06711   | 0.18642       | 0.50624                     |
| RealHAAR   | 0.98571 | 1.97104   | 0.03425       | 0.52432                     |
| RandDCT    | 0.97926 | 1.95288   | 0.03499       | 0.79562                     |

Table 20: Results of Test 2 for  $\Psi_{Shannon}$ ,  $\gamma = 0.5$  and  $\beta = 0.3$

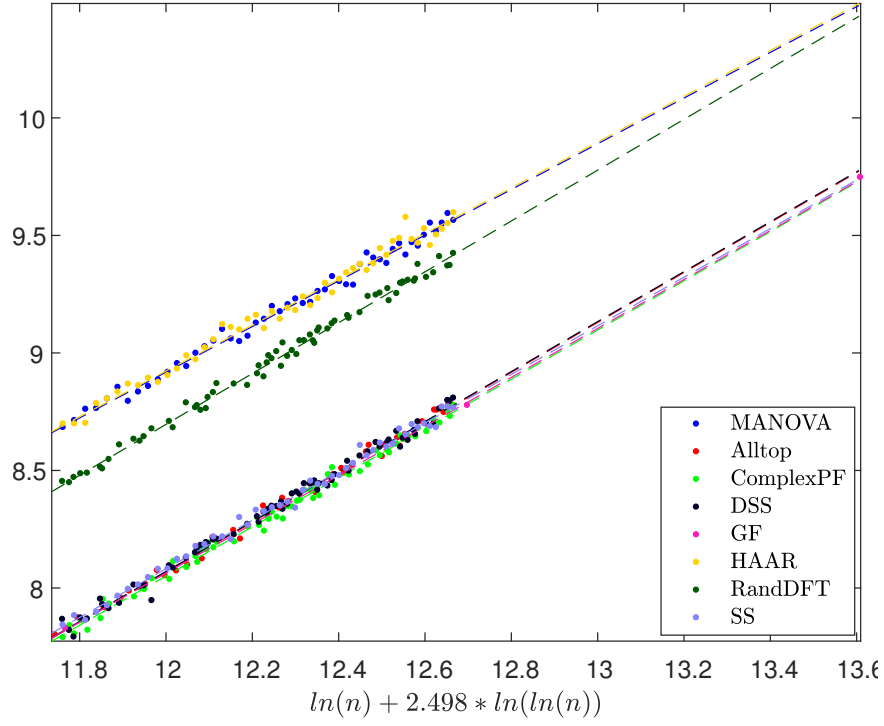

Figure 35: Test 2 for  $\Psi_{RIP}$ , complex frames  $\gamma = 0.5$  and  $\beta = 0.3$ . Plot shows  $-\ln \mathbb{E}_{K_n}(\Delta_{\Psi}(X_{K_n}^{(n)}; n, m_n, k_n)^2)$

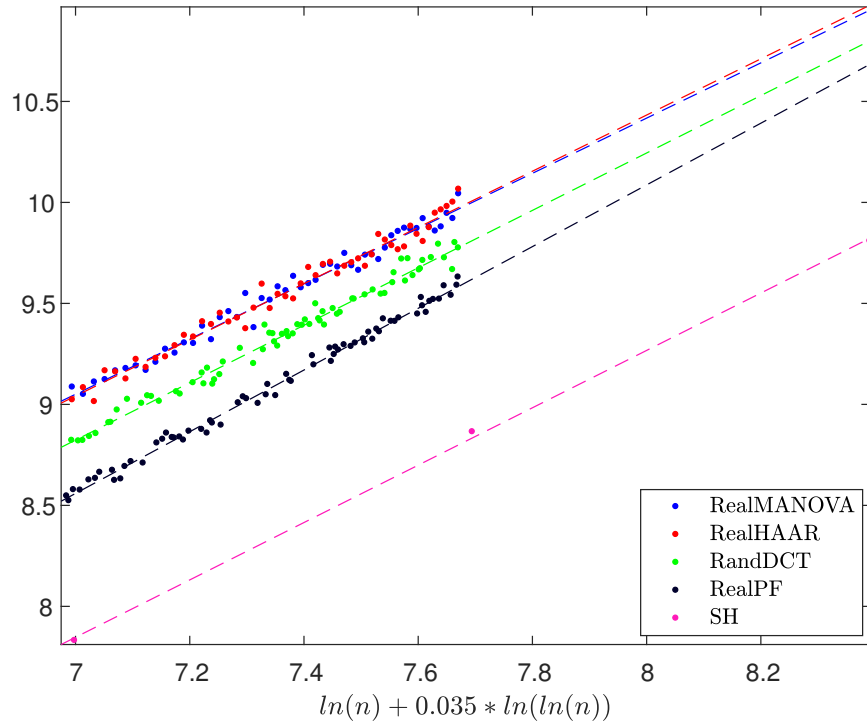

Figure 36: Test 2 for  $\Psi_{RIP}$ , real frames  $\gamma = 0.5$  and  $\beta = 0.3$ . Plot shows  $-\ln \mathbb{E}_{K_n}(\Delta_{\Psi}(X_{K_n}^{(n)}; n, m_n, k_n)^2)$

| Frame      | $R^2$   | $\hat{b}$ | $SE(\hat{b})$ | p-value<br>$b = b_{MANOVA}$ |
|------------|---------|-----------|---------------|-----------------------------|
| MANOVA     | 0.99022 | 0.97190   | 0.01394       | 1                           |
| DSS        | 0.99230 | 1.06289   | 0.01153       | 1.8462e-06                  |
| GF         | 0.99983 | 1.04116   | 0.01361       | 8.5024e-04                  |
| ComplexPF  | 0.99324 | 1.04645   | 0.01063       | 4.3545e-05                  |
| Alltop     | 0.99410 | 1.06272   | 0.01384       | 1.3734e-05                  |
| SS         | 0.99410 | 1.03385   | 0.01150       | 8.9722e-04                  |
| HAAR       | 0.98463 | 0.97387   | 0.01756       | 0.93002                     |
| RandDFT    | 0.99285 | 1.08149   | 0.01130       | 1.4463e-08                  |
| RealMANOVA | 0.98044 | 1.36720   | 0.02787       | 1                           |
| RealPF     | 0.99275 | 1.52753   | 0.01619       | 2.3533e-06                  |
| SH         | 0.99933 | 1.42032   | 0.03666       | 0.25426                     |
| RealHAAR   | 0.97597 | 1.39123   | 0.03151       | 0.56908                     |
| RandDCT    | 0.98226 | 1.42152   | 0.02351       | 0.13904                     |

Table 21: Results of Test 2 for  $\Psi_{RIP}$ ,  $\gamma = 0.5$  and  $\beta = 0.3$

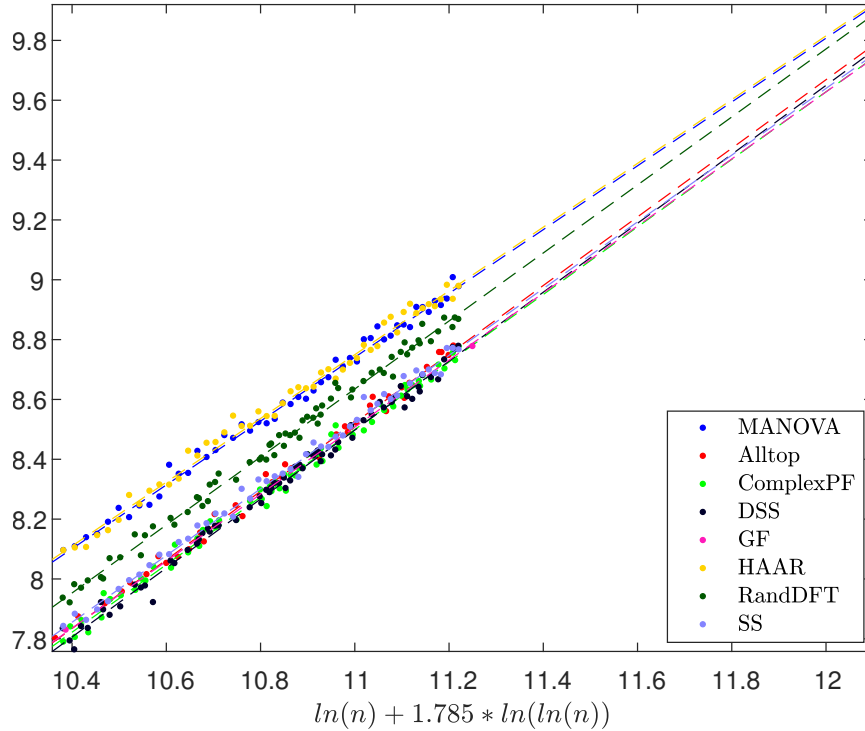

Figure 37: Test 2 for  $\Psi_{max}$ , complex frames  $\gamma = 0.5$  and  $\beta = 0.3$ . Plot shows  $-\ln \mathbb{E}_{K_n}(\Delta_\Psi(X_{K_n}^{(n)}; n, m_n, k_n)^2)$

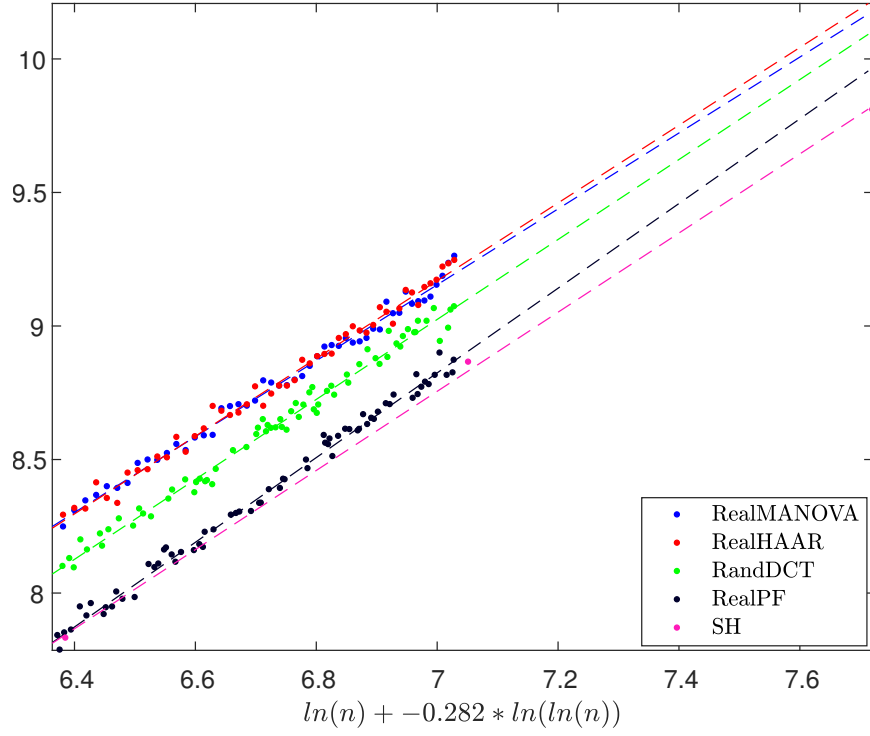

Figure 38: Test 2 for  $\Psi_{max}$ , real frames  $\gamma = 0.5$  and  $\beta = 0.3$ . Plot shows  $-\ln \mathbb{E}_{K_n}(\Delta_{\Psi}(X_{K_n}^{(n)}; n, m_n, k_n)^2)$

| Frame      | $R^2$   | $\hat{b}$ | $SE(\hat{b})$ | p-value<br>$b = b_{MANOVA}$ |
|------------|---------|-----------|---------------|-----------------------------|
| MANOVA     | 0.99275 | 1.06652   | 0.01316       | 1                           |
| DSS        | 0.99266 | 1.15219   | 0.01220       | 5.3891e-06                  |
| GF         | 0.99987 | 1.12022   | 0.01296       | 0.00547                     |
| ComplexPF  | 0.99324 | 1.12883   | 0.01146       | 5.2296e-04                  |
| Alltop     | 0.99412 | 1.14631   | 0.01490       | 1.3037e-04                  |
| SS         | 0.99409 | 1.11517   | 0.01241       | 0.00845                     |
| HAAR       | 0.99041 | 1.06568   | 0.01514       | 0.96659                     |
| RandDFT    | 0.99250 | 1.13637   | 0.01216       | 1.6393e-04                  |
| RealMANOVA | 0.99017 | 1.42122   | 0.02044       | 1                           |
| RealPF     | 0.99221 | 1.58564   | 0.01743       | 1.3782e-08                  |
| SH         | 0.99927 | 1.48165   | 0.03992       | 0.18400                     |
| RealHAAR   | 0.98861 | 1.45533   | 0.02255       | 0.26515                     |
| RandDCT    | 0.98670 | 1.49715   | 0.02139       | 0.01158                     |

Table 22: Results of Test 2 for  $\Psi_{max}$ ,  $\gamma = 0.5$  and  $\beta = 0.3$

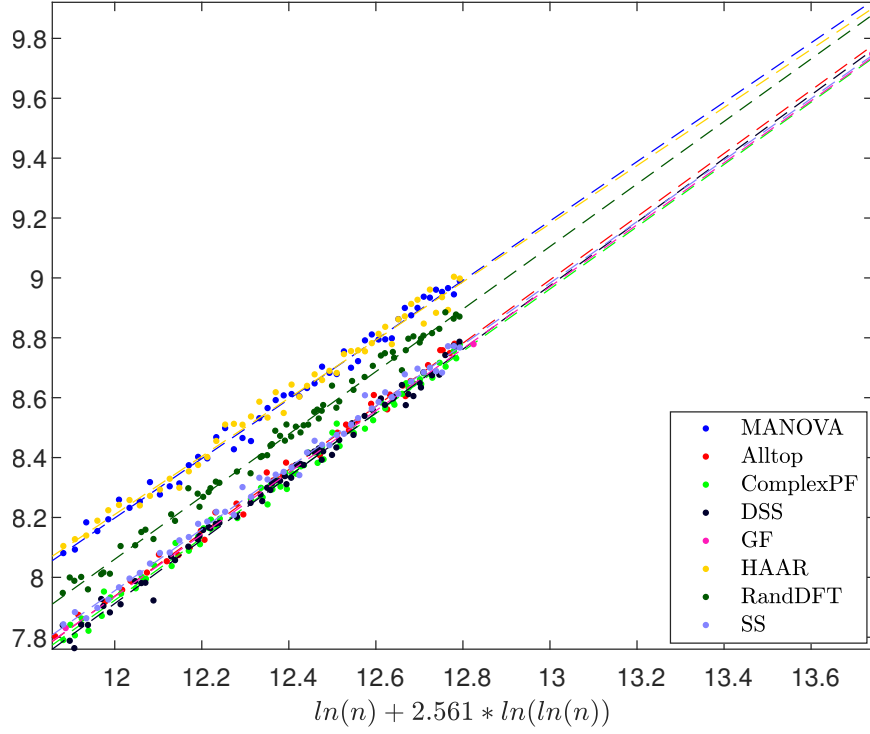

Figure 39: Test 2 for  $\Psi_{min}$ , complex frames  $\gamma = 0.5$  and  $\beta = 0.3$ . Plot shows  $-\ln \mathbb{E}_{K_n}(\Delta_\Psi(X_{K_n}^{(n)}; n, m_n, k_n)^2)$

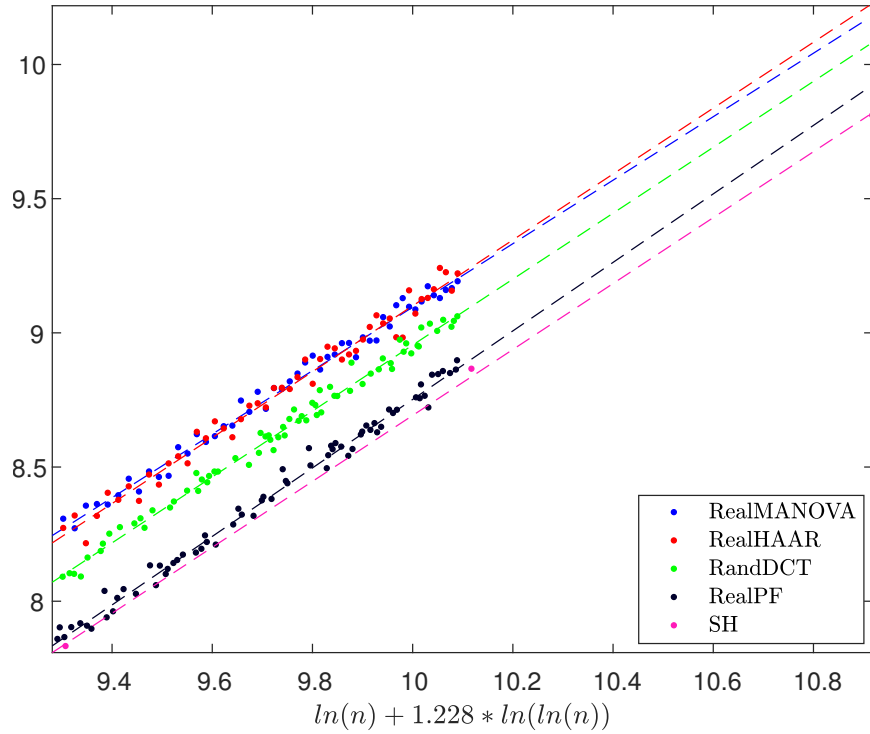

Figure 40: Test 2 for  $\Psi_{min}$ , real frames  $\gamma = 0.5$  and  $\beta = 0.3$ . Plot shows  $-\ln \mathbb{E}_{K_n}(\Delta_\Psi(X_{K_n}^{(n)}; n, m_n, k_n)^2)$

| Frame      | $R^2$   | $\hat{b}$ | $SE(\hat{b})$ | p-value<br>$b = b_{MANOVA}$ |
|------------|---------|-----------|---------------|-----------------------------|
| MANOVA     | 0.99056 | 0.99182   | 0.01397       | 1                           |
| DSS        | 0.99244 | 1.06161   | 0.01141       | 1.8239e-04                  |
| GF         | 0.99983 | 1.03473   | 0.01366       | 0.03283                     |
| ComplexPF  | 0.99324 | 1.03977   | 0.01056       | 0.00718                     |
| Alltop     | 0.99410 | 1.05594   | 0.01375       | 0.00157                     |
| SS         | 0.99410 | 1.02726   | 0.01142       | 0.05251                     |
| HAAR       | 0.98729 | 0.97082   | 0.01590       | 0.32367                     |
| RandDFT    | 0.99234 | 1.04425   | 0.01129       | 0.00424                     |
| RealMANOVA | 0.98840 | 1.18289   | 0.01850       | 1                           |
| RealPF     | 0.99132 | 1.27638   | 0.01481       | 1.3915e-04                  |
| SH         | 0.99950 | 1.22853   | 0.02737       | 0.17335                     |
| RealHAAR   | 0.98073 | 1.22789   | 0.02484       | 0.14952                     |
| RandDCT    | 0.99002 | 1.22842   | 0.01518       | 0.05964                     |

Table 23: Results of Test 2 for  $\Psi_{min}$ ,  $\gamma = 0.5$  and  $\beta = 0.3$

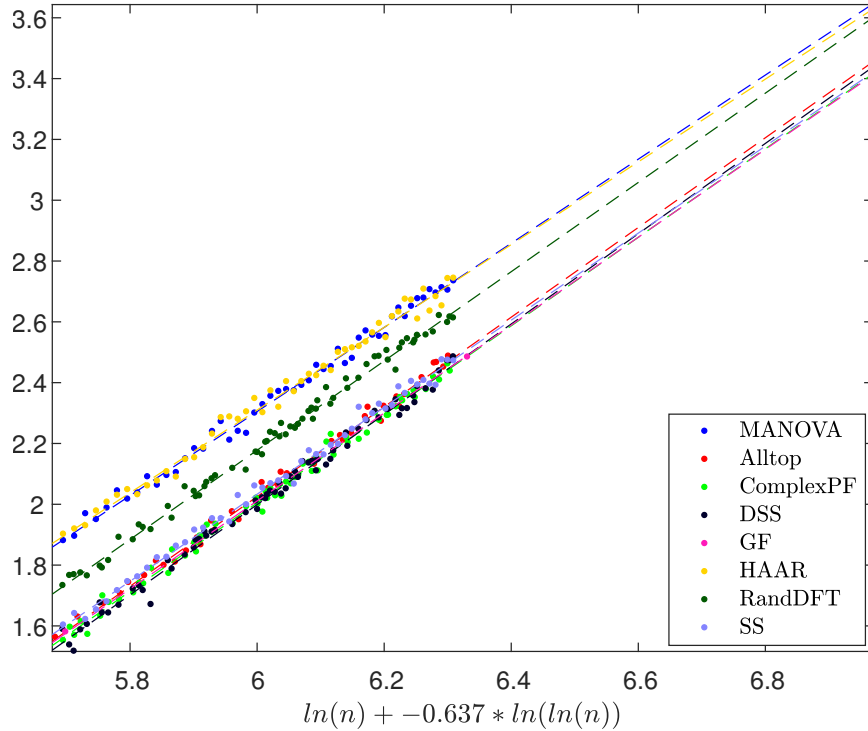

Figure 41: Test 2 for  $\Psi_{cond}$ , complex frames  $\gamma = 0.5$  and  $\beta = 0.3$ . Plot shows  $-\ln \mathbb{E}_{K_n}(\Delta_{\Psi}(X_{K_n}^{(n)}; n, m_n, k_n)^2)$



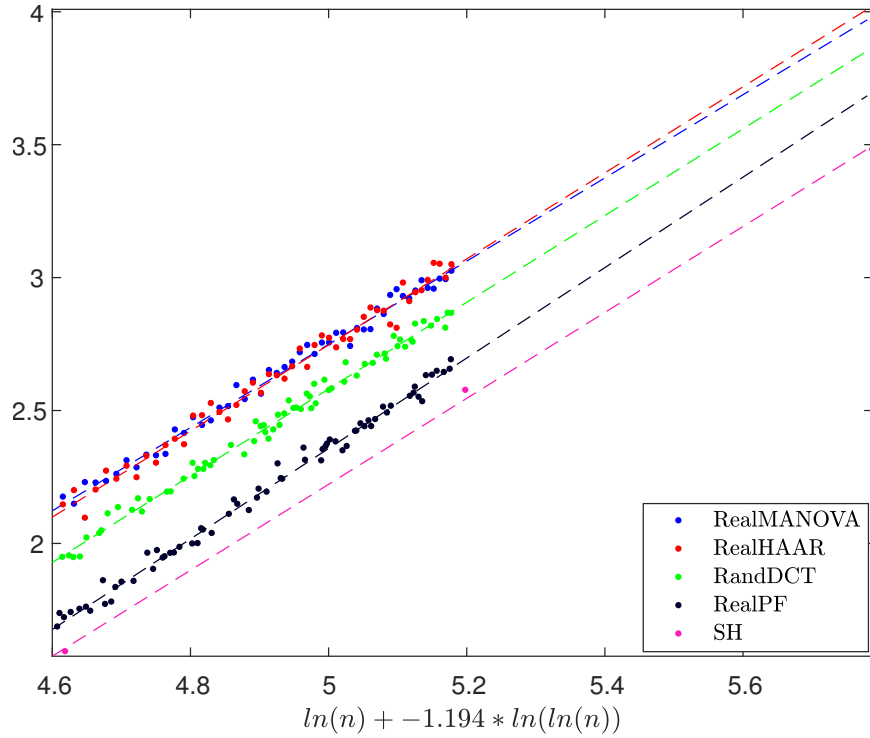

Figure 42: Test 2 for  $\Psi_{cond}$ , real frames  $\gamma = 0.5$  and  $\beta = 0.3$ . Plot shows  $-\ln \mathbb{E}_{K_n}(\Delta_{\Psi}(X_{K_n}^{(n)}; n, m_n, k_n)^2)$

| Frame      | $R^2$   | $\hat{b}$ | $SE(\hat{b})$ | p-value<br>$b = b_{MANOVA}$ |
|------------|---------|-----------|---------------|-----------------------------|
| MANOVA     | 0.99238 | 1.38324   | 0.01749       | 1                           |
| DSS        | 0.99216 | 1.48483   | 0.01625       | 4.3057e-05                  |
| GF         | 0.99996 | 1.44541   | 0.00911       | 0.00276                     |
| ComplexPF  | 0.99312 | 1.45565   | 0.01491       | 0.00208                     |
| Alltop     | 0.99463 | 1.47514   | 0.01832       | 4.9255e-04                  |
| SS         | 0.99399 | 1.43121   | 0.01607       | 0.04620                     |
| HAAR       | 0.98901 | 1.36048   | 0.02070       | 0.40310                     |
| RandDFT    | 0.99366 | 1.46787   | 0.01443       | 2.9738e-04                  |
| RealMANOVA | 0.98972 | 1.56531   | 0.02303       | 1                           |
| RealPF     | 0.99237 | 1.70134   | 0.01851       | 1.0890e-05                  |
| SH         | 0.99918 | 1.61649   | 0.04624       | 0.32662                     |
| RealHAAR   | 0.98148 | 1.61870   | 0.03210       | 0.17972                     |
| RandDCT    | 0.99014 | 1.63103   | 0.02003       | 0.03340                     |

Table 24: Results of Test 2 for  $\Psi_{cond}$ ,  $\gamma = 0.5$  and  $\beta = 0.3$

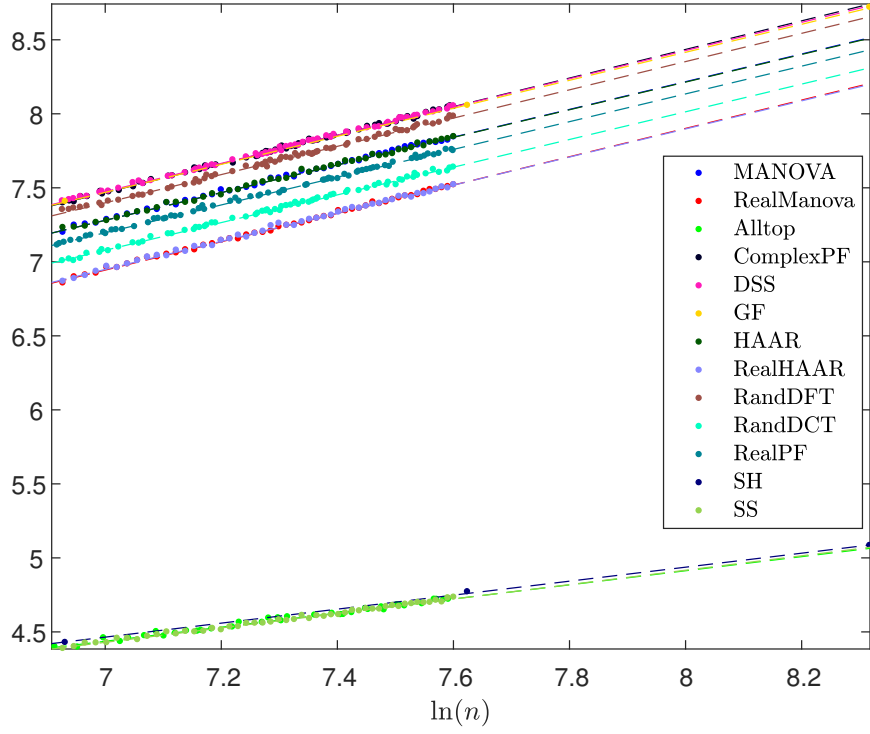

Figure 43: Test 1 for  $\gamma = 0.5$  and  $\beta = 0.7$ . Plot shows  $-\frac{1}{2} \ln \text{Var}_{K_n}(\Delta_{KS}(X_{K_n}^{(n)}; n, m_n, k_n))$  over  $\ln(n)$ .

| Frame      | $R^2$   | $\hat{b}$ | $SE(\hat{b})$ | p-value<br>$b = b_{MANOVA}$ |
|------------|---------|-----------|---------------|-----------------------------|
| MANOVA     | 0.99781 | 0.93614   | 0.00634       | 1                           |
| DSS        | 0.99862 | 0.95288   | 0.00436       | 0.03163                     |
| GF         | 0.99997 | 0.94619   | 0.00548       | 0.23647                     |
| ComplexPF  | 0.99812 | 0.96660   | 0.00516       | 3.0455e-04                  |
| Alltop     | 0.98575 | 0.47645   | 0.00968       | 8.9010e-56                  |
| SS         | 0.99349 | 0.48714   | 0.00569       | 1.1118e-72                  |
| HAAR       | 0.99755 | 0.93398   | 0.00667       | 0.81484                     |
| RandDFT    | 0.99692 | 0.95416   | 0.00653       | 0.05003                     |
| RealMANOVA | 0.99854 | 0.95719   | 0.00528       | 1                           |
| RealPF     | 0.99847 | 0.93757   | 0.00455       | 0.00575                     |
| SH         | 0.99930 | 0.47252   | 0.01250       | 9.4783e-37                  |
| RealHAAR   | 0.99729 | 0.94907   | 0.00715       | 0.36285                     |
| RandDCT    | 0.99744 | 0.93559   | 0.00584       | 0.00702                     |

Table 25: Results of Test 1 for  $\gamma = 0.5$  and  $\beta = 0.7$ .

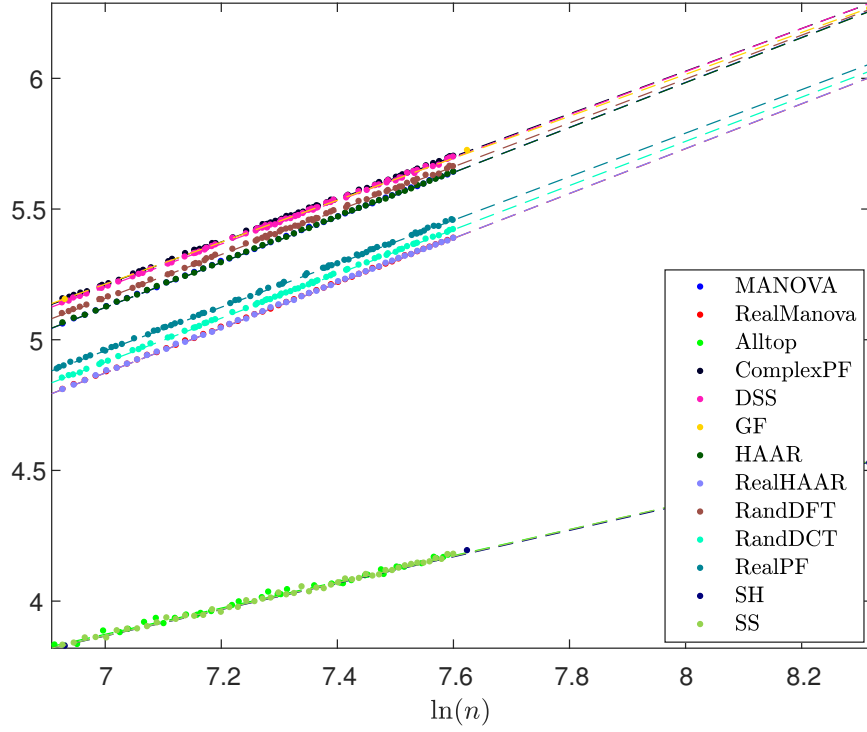

Figure 44: Test 1 for  $\gamma = 0.5$  and  $\beta = 0.7$ . Plot shows  $-\frac{1}{2} \ln \mathbb{E}_{K_n}(\Delta_{KS}(X_{K_n}^{(n)}; n, m_n, k_n)^2)$  over  $\ln(n)$ .

| Frame      | $R^2$   | $\hat{b}$ | $SE(\hat{b})$ | p-value<br>$b = b_{MANOVA}$ |
|------------|---------|-----------|---------------|-----------------------------|
| MANOVA     | 0.99995 | 0.86099   | 0.00089       | 1                           |
| DSS        | 0.99952 | 0.82437   | 0.00221       | 1.6297e-29                  |
| GF         | 0.99980 | 0.80241   | 0.01148       | 5.7020e-06                  |
| ComplexPF  | 0.99975 | 0.81672   | 0.00159       | 5.6500e-47                  |
| Alltop     | 0.99326 | 0.50123   | 0.00698       | 1.5720e-64                  |
| SS         | 0.99588 | 0.50803   | 0.00472       | 3.2682e-86                  |
| HAAR       | 0.99991 | 0.85964   | 0.00118       | 0.36383                     |
| RandDFT    | 0.99961 | 0.83909   | 0.00203       | 5.3952e-17                  |
| RealMANOVA | 0.99994 | 0.85797   | 0.00098       | 1                           |
| RealPF     | 0.99982 | 0.83245   | 0.00137       | 5.8107e-29                  |
| SH         | 0.99937 | 0.50503   | 0.01265       | 1.1105e-31                  |
| RealHAAR   | 0.99983 | 0.85836   | 0.00160       | 0.83498                     |
| RandDCT    | 0.99986 | 0.84552   | 0.00125       | 2.3074e-12                  |

Table 26: Results of Test 1 (MSE) for  $\gamma = 0.5$  and  $\beta = 0.7$ .

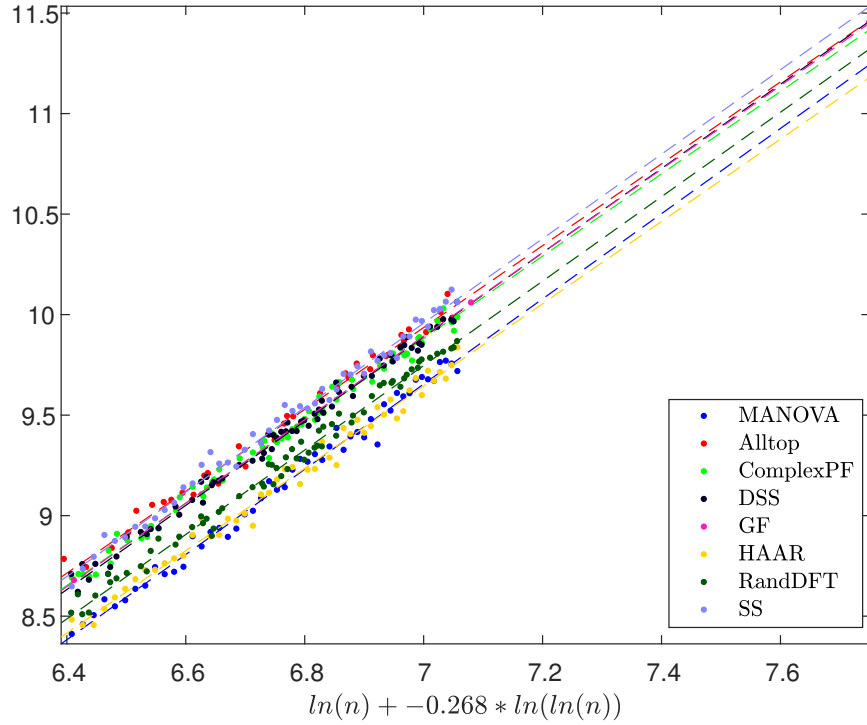

Figure 45: Test 2 for  $\Psi_{AC}$ , complex frames  $\gamma = 0.5$  and  $\beta = 0.7$ . Plot shows  $-\ln \mathbb{E}_{K_n}(\Delta_{\Psi}(X_{K_n}^{(n)}; n, m_n, k_n)^2)$

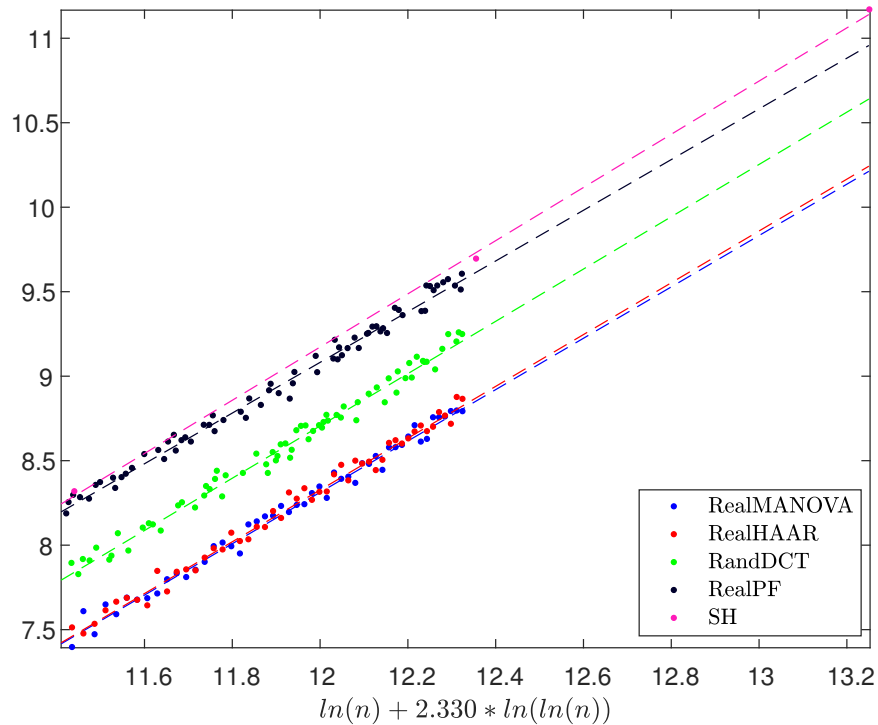

Figure 46: Test 2 for  $\Psi_{AC}$ , real frames  $\gamma = 0.5$  and  $\beta = 0.7$ . Plot shows  $-\ln \mathbb{E}_{K_n}(\Delta_{\Psi}(X_{K_n}^{(n)}; n, m_n, k_n)^2)$

| Frame      | $R^2$   | $\hat{b}$ | $SE(\hat{b})$ | p-value<br>$b = b_{MANOVA}$ |
|------------|---------|-----------|---------------|-----------------------------|
| MANOVA     | 0.98926 | 2.11954   | 0.03187       | 1                           |
| DSS        | 0.99236 | 2.09471   | 0.02262       | 0.52665                     |
| GF         | 1.00000 | 2.07672   | 0.00454       | 0.18970                     |
| ComplexPF  | 0.99162 | 2.04781   | 0.02317       | 0.07135                     |
| Alltop     | 0.98981 | 2.03636   | 0.03493       | 0.08224                     |
| SS         | 0.99064 | 2.10064   | 0.02946       | 0.66433                     |
| HAAR       | 0.98611 | 2.04757   | 0.03507       | 0.13217                     |
| RandDFT    | 0.99083 | 2.10030   | 0.02487       | 0.63509                     |
| RealMANOVA | 0.98806 | 1.51990   | 0.02411       | 1                           |
| RealPF     | 0.98924 | 1.50015   | 0.01941       | 0.52485                     |
| SH         | 0.99932 | 1.57420   | 0.04097       | 0.25896                     |
| RealHAAR   | 0.98870 | 1.53283   | 0.02365       | 0.70259                     |
| RandDCT    | 0.98535 | 1.54744   | 0.02322       | 0.41238                     |

Table 27: Results of Test 2 for  $\Psi_{AC}$ ,  $\gamma = 0.5$  and  $\beta = 0.7$

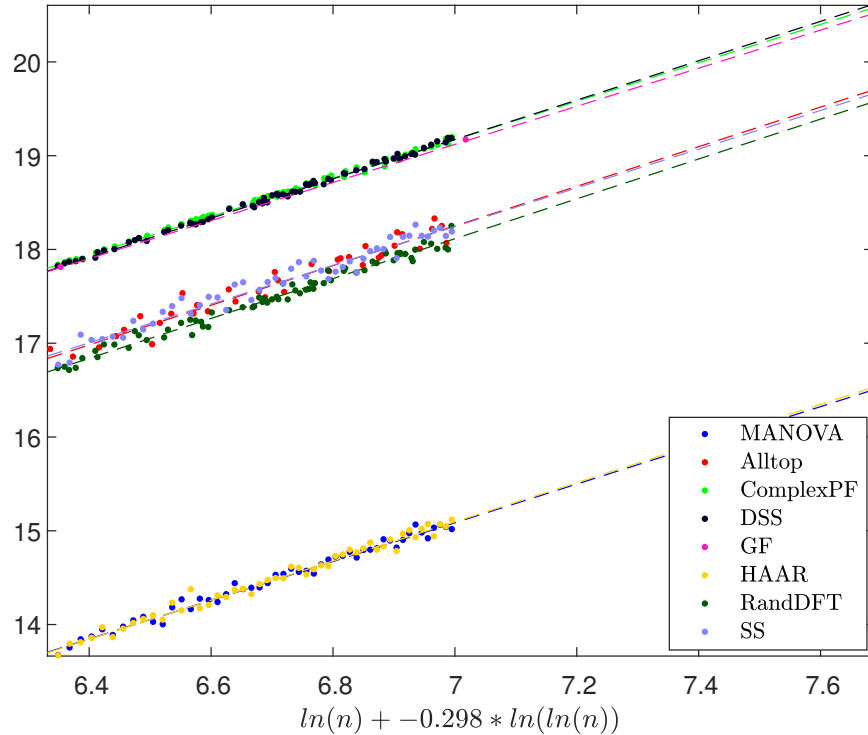

Figure 47: Test 2 for  $\Psi_{Shannon}$ , complex frames  $\gamma = 0.5$  and  $\beta = 0.7$ . Plot shows  $-\ln \mathbb{E}_{K_n}(\Delta_{\Psi}(X_{K_n}^{(n)}; n, m_n, k_n)^2)$

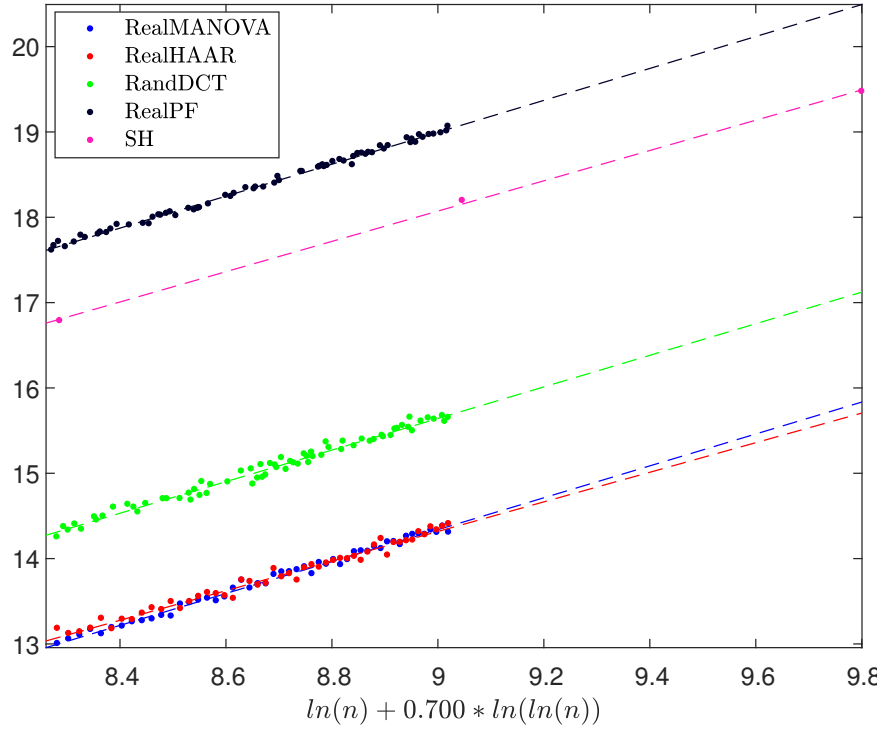

Figure 48: Test 2 for  $\Psi_{Shannon}$ , real frames  $\gamma = 0.5$  and  $\beta = 0.7$ . Plot shows  $-\ln \mathbb{E}_{K_n}(\Delta_{\Psi}(X_{K_n}^{(n)}; n, m_n, k_n)^2)$

| Frame      | $R^2$   | $\hat{b}$ | $SE(\hat{b})$ | p-value<br>$b = b_{MANOVA}$ |
|------------|---------|-----------|---------------|-----------------------------|
| MANOVA     | 0.98597 | 2.06467   | 0.03554       | 1                           |
| DSS        | 0.99697 | 2.09908   | 0.01424       | 0.37067                     |
| GF         | 0.99999 | 2.03088   | 0.00733       | 0.35636                     |
| ComplexPF  | 0.99759 | 2.04939   | 0.01241       | 0.68567                     |
| Alltop     | 0.94715 | 2.11342   | 0.08439       | 0.59588                     |
| SS         | 0.95593 | 2.06461   | 0.06399       | 0.99936                     |
| HAAR       | 0.98238 | 2.08832   | 0.04037       | 0.66114                     |
| RandDFT    | 0.97959 | 2.12566   | 0.03777       | 0.24205                     |
| RealMANOVA | 0.99160 | 1.86924   | 0.02483       | 1                           |
| RealPF     | 0.99567 | 1.87123   | 0.01530       | 0.94592                     |
| SH         | 0.99933 | 1.77511   | 0.04585       | 0.07715                     |
| RealHAAR   | 0.98081 | 1.73457   | 0.03502       | 0.00227                     |
| RandDCT    | 0.98255 | 1.85061   | 0.03036       | 0.63561                     |

Table 28: Results of Test 2 for  $\Psi_{Shannon}$ ,  $\gamma = 0.5$  and  $\beta = 0.7$

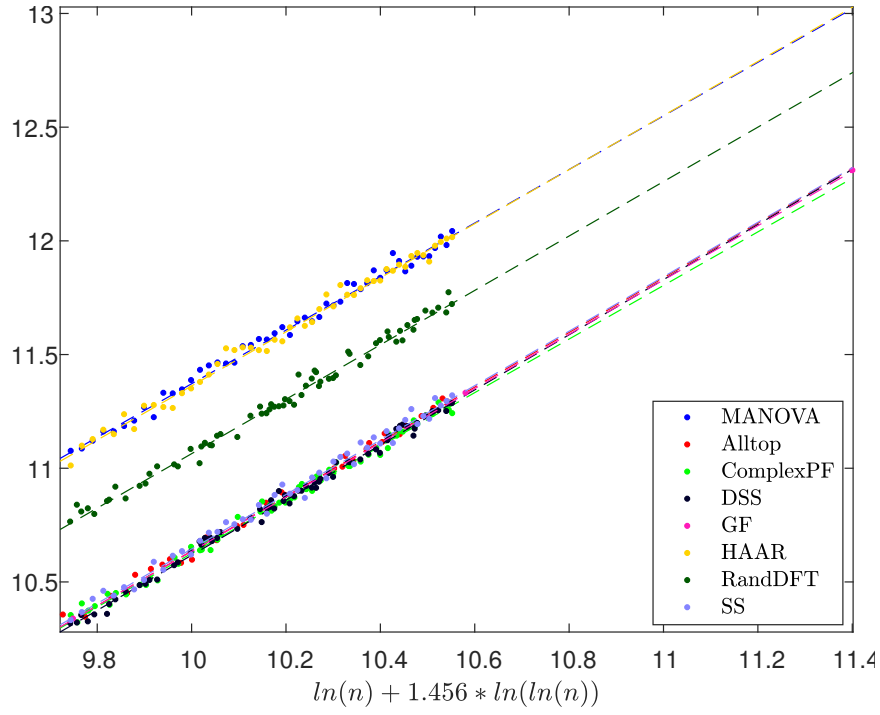

Figure 49: Test 2 for  $\Psi_{RIP}$ , complex frames  $\gamma = 0.5$  and  $\beta = 0.7$ . Plot shows  $-\ln \mathbb{E}_{K_n}(\Delta_\Psi(X_{K_n}^{(n)}; n, m_n, k_n)^2)$

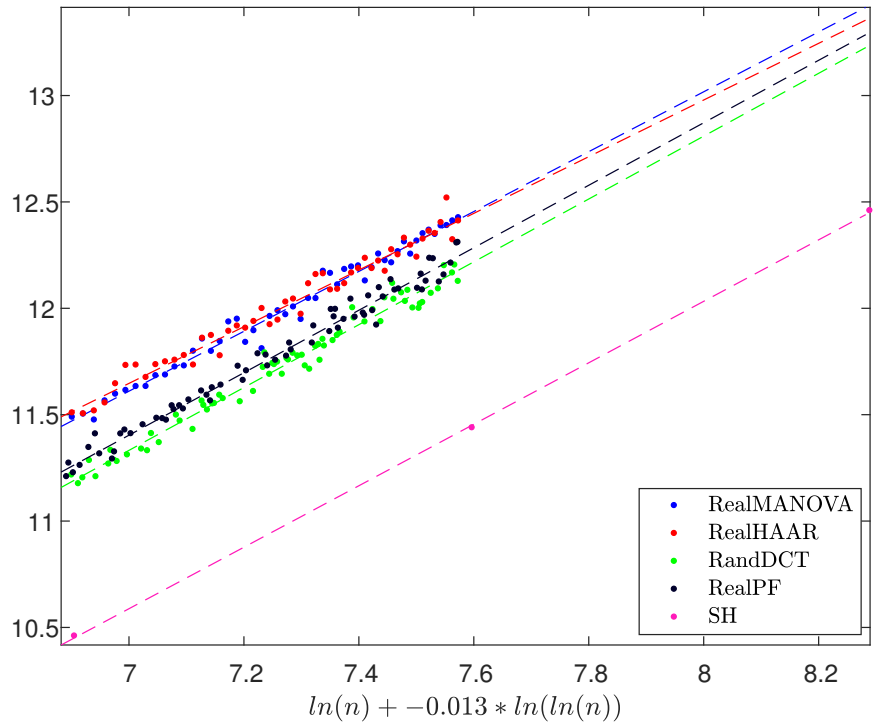

Figure 50: Test 2 for  $\Psi_{RIP}$ , real frames  $\gamma = 0.5$  and  $\beta = 0.7$ . Plot shows  $-\ln \mathbb{E}_{K_n}(\Delta_\Psi(X_{K_n}^{(n)}; n, m_n, k_n)^2)$

| Frame      | $R^2$   | $\hat{b}$ | $SE(\hat{b})$ | p-value<br>$b = b_{MANOVA}$ |
|------------|---------|-----------|---------------|-----------------------------|
| MANOVA     | 0.99163 | 1.17800   | 0.01562       | 1                           |
| DSS        | 0.99482 | 1.21202   | 0.01077       | 0.07552                     |
| GF         | 1.00000 | 1.19385   | 0.00000       | 0.31505                     |
| ComplexPF  | 0.99371 | 1.17836   | 0.01154       | 0.98495                     |
| Alltop     | 0.99525 | 1.20188   | 0.01403       | 0.25858                     |
| SS         | 0.99122 | 1.19728   | 0.01627       | 0.39463                     |
| HAAR       | 0.98964 | 1.18927   | 0.01756       | 0.63261                     |
| RandDFT    | 0.98963 | 1.19663   | 0.01508       | 0.39254                     |
| RealMANOVA | 0.98031 | 1.40713   | 0.02878       | 1                           |
| RealPF     | 0.98171 | 1.46841   | 0.02486       | 0.10995                     |
| SH         | 0.99985 | 1.44473   | 0.01741       | 0.26908                     |
| RealHAAR   | 0.97038 | 1.33189   | 0.03359       | 0.09219                     |
| RandDCT    | 0.97728 | 1.47675   | 0.02772       | 0.08416                     |

Table 29: Results of Test 2 for  $\Psi_{RIP}$ ,  $\gamma = 0.5$  and  $\beta = 0.7$

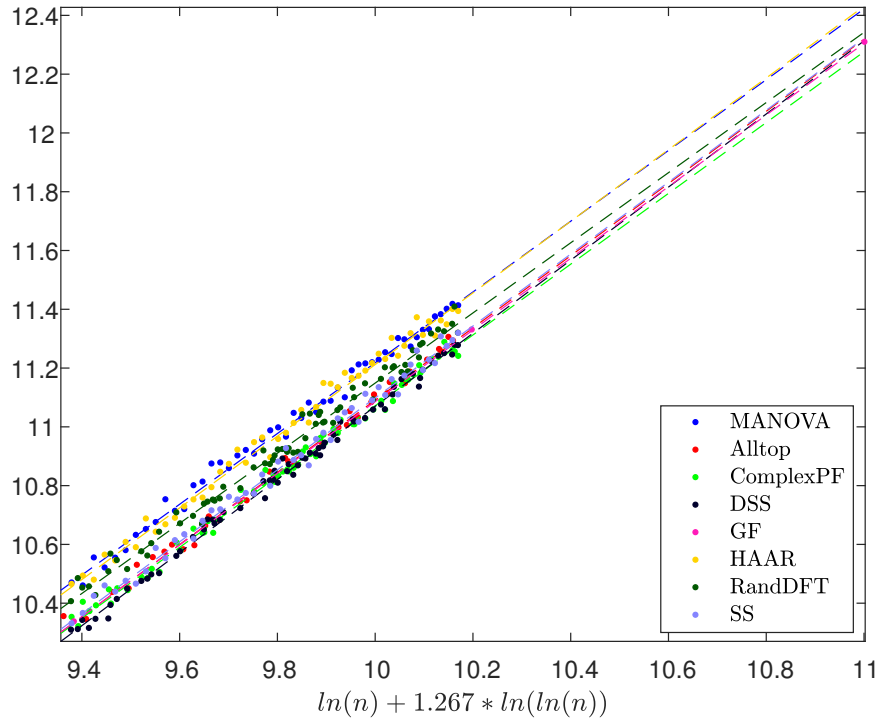

Figure 51: Test 2 for  $\Psi_{max}$ , complex frames  $\gamma = 0.5$  and  $\beta = 0.7$ . Plot shows  $-\ln \mathbb{E}_{K_n}(\Delta_{\Psi}(X_{K_n}^{(n)}; n, m_n, k_n)^2)$



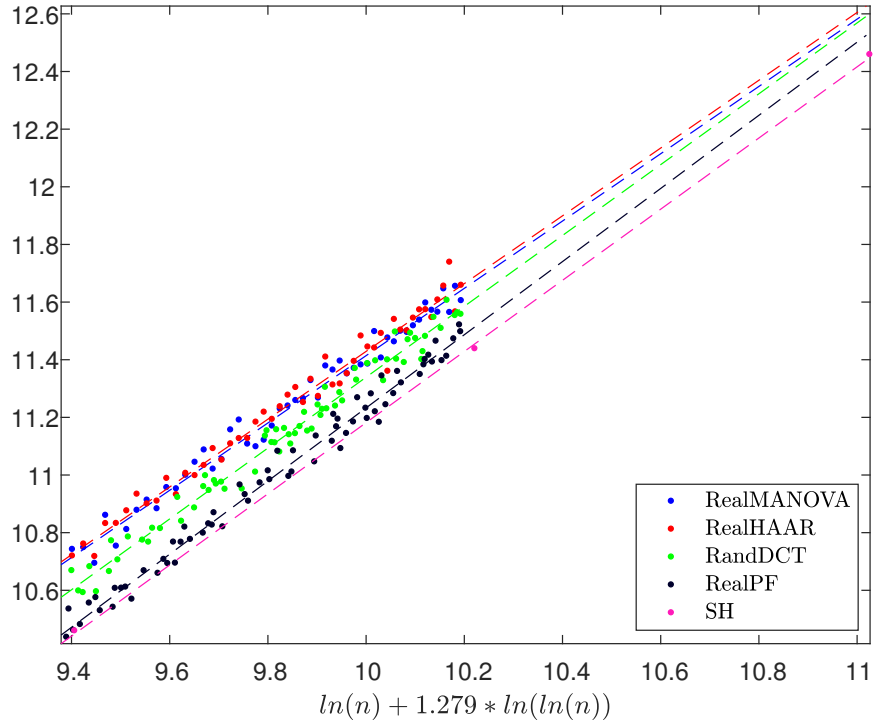

Figure 52: Test 2 for  $\Psi_{max}$ , real frames  $\gamma = 0.5$  and  $\beta = 0.7$ . Plot shows  $-\ln \mathbb{E}_{K_n}(\Delta_{\Psi}(X_{K_n}^{(n)}; n, m_n, k_n)^2)$

| Frame      | $R^2$   | $\hat{b}$ | $SE(\hat{b})$ | p-value<br>$b = b_{MANOVA}$ |
|------------|---------|-----------|---------------|-----------------------------|
| MANOVA     | 0.99281 | 1.20385   | 0.01479       | 1                           |
| DSS        | 0.99482 | 1.24351   | 0.01105       | 0.03381                     |
| GF         | 1.00000 | 1.21923   | 0.00057       | 0.30390                     |
| ComplexPF  | 0.99371 | 1.20440   | 0.01179       | 0.97686                     |
| Alltop     | 0.99526 | 1.22841   | 0.01433       | 0.23633                     |
| SS         | 0.99122 | 1.22371   | 0.01662       | 0.37430                     |
| HAAR       | 0.98968 | 1.21898   | 0.01797       | 0.51696                     |
| RandDFT    | 0.98896 | 1.19315   | 0.01552       | 0.61880                     |
| RealMANOVA | 0.98140 | 1.16763   | 0.02320       | 1                           |
| RealPF     | 0.98604 | 1.26889   | 0.01873       | 9.4468e-04                  |
| SH         | 0.99975 | 1.23451   | 0.01960       | 0.03241                     |
| RealHAAR   | 0.97935 | 1.17595   | 0.02465       | 0.80640                     |
| RandDCT    | 0.98079 | 1.22919   | 0.02118       | 0.05250                     |

Table 30: Results of Test 2 for  $\Psi_{max}$ ,  $\gamma = 0.5$  and  $\beta = 0.7$

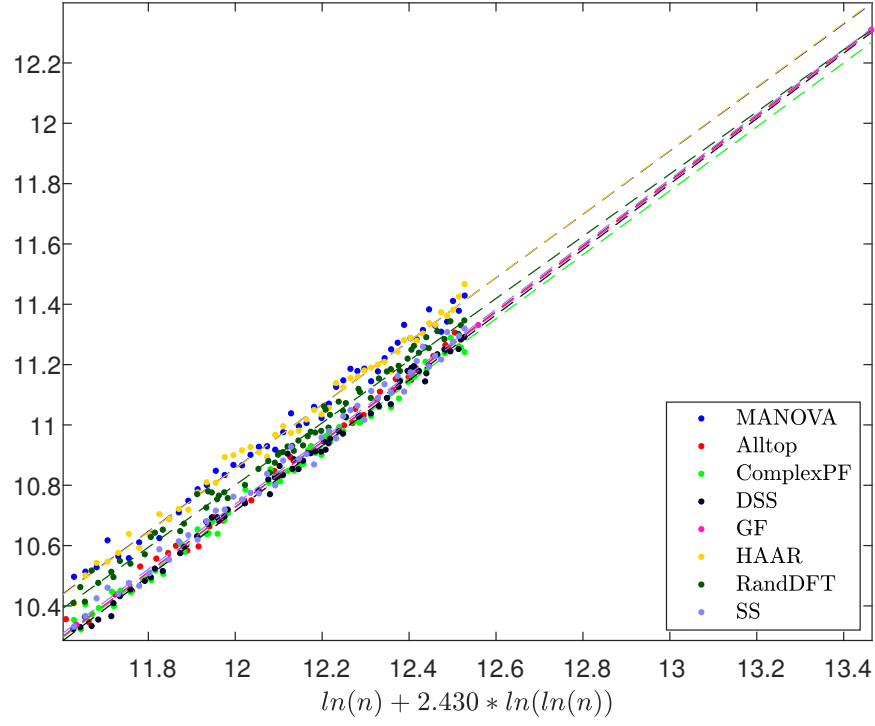

Figure 53: Test 2 for  $\Psi_{min}$ , complex frames  $\gamma = 0.5$  and  $\beta = 0.7$ . Plot shows  $-\ln \mathbb{E}_{K_n}(\Delta_{\Psi}(X_{K_n}^{(n)}; n, m_n, k_n)^2)$

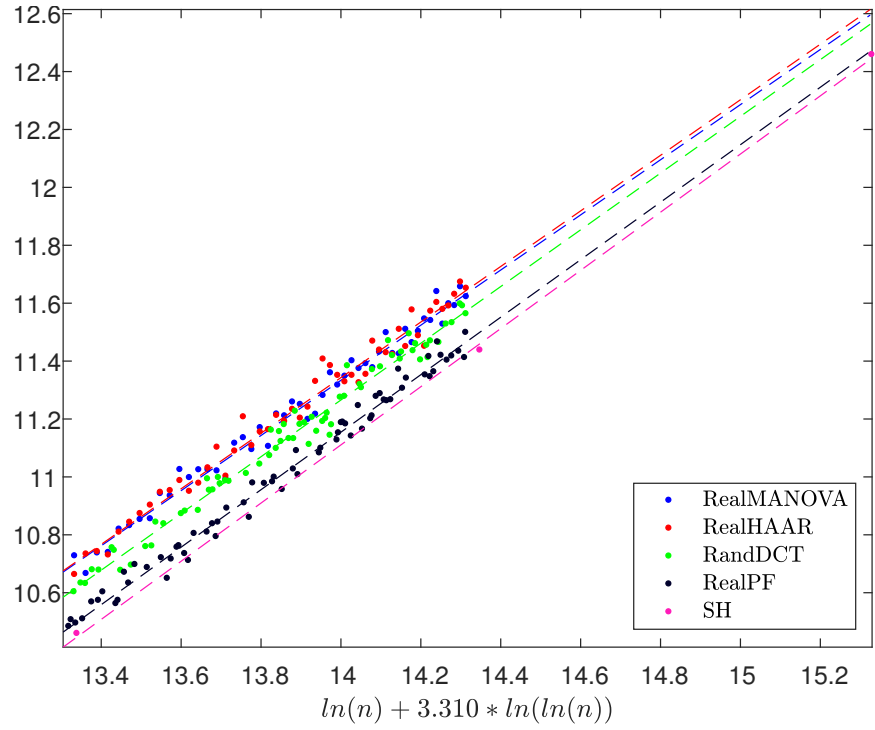

Figure 54: Test 2 for  $\Psi_{min}$ , real frames  $\gamma = 0.5$  and  $\beta = 0.7$ . Plot shows  $-\ln \mathbb{E}_{K_n}(\Delta_{\Psi}(X_{K_n}^{(n)}; n, m_n, k_n)^2)$

| Frame      | $R^2$   | $\hat{b}$ | $SE(\hat{b})$ | p-value<br>$b = b_{MANOVA}$ |
|------------|---------|-----------|---------------|-----------------------------|
| MANOVA     | 0.98978 | 1.05181   | 0.01542       | 1                           |
| DSS        | 0.99485 | 1.08386   | 0.00960       | 0.08035                     |
| GF         | 1.00000 | 1.07793   | 0.00231       | 0.10034                     |
| ComplexPF  | 0.99371 | 1.05999   | 0.01038       | 0.66086                     |
| Alltop     | 0.99521 | 1.08123   | 0.01268       | 0.14438                     |
| SS         | 0.99121 | 1.07709   | 0.01464       | 0.23750                     |
| HAAR       | 0.99139 | 1.05452   | 0.01419       | 0.89754                     |
| RandDFT    | 0.99236 | 1.03106   | 0.01114       | 0.27780                     |
| RealMANOVA | 0.98343 | 0.95228   | 0.01784       | 1                           |
| RealPF     | 0.98827 | 0.99291   | 0.01342       | 0.07140                     |
| SH         | 0.99960 | 1.00464   | 0.02016       | 0.05755                     |
| RealHAAR   | 0.97875 | 0.95975   | 0.02041       | 0.78346                     |
| RandDCT    | 0.98148 | 0.97957   | 0.01656       | 0.26473                     |

Table 31: Results of Test 2 for  $\Psi_{min}$ ,  $\gamma = 0.5$  and  $\beta = 0.7$

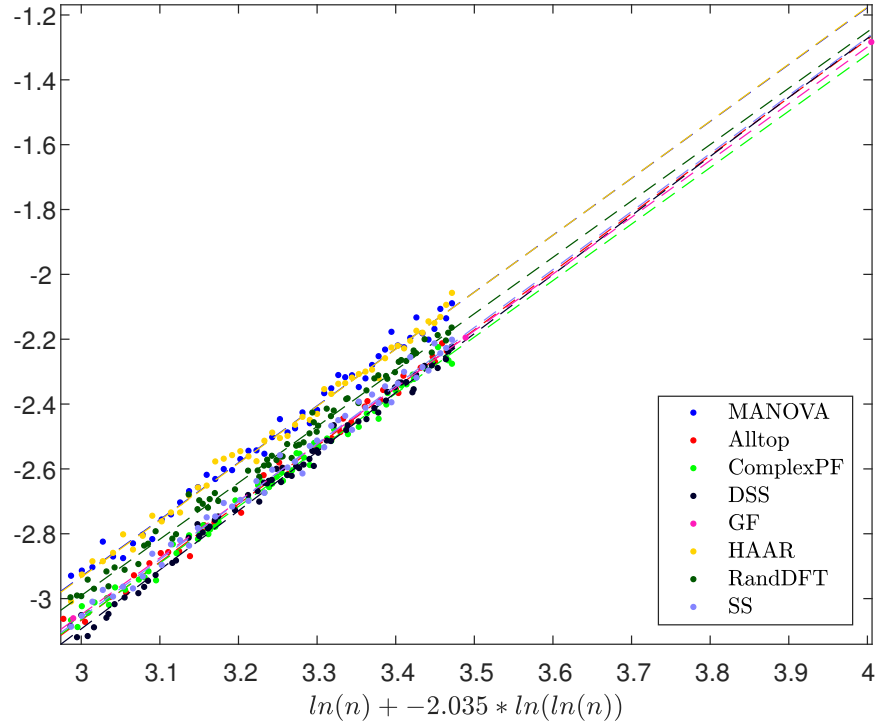

Figure 55: Test 2 for  $\Psi_{cond}$ , complex frames  $\gamma = 0.5$  and  $\beta = 0.7$ . Plot shows  $-\ln \mathbb{E}_{K_n}(\Delta_{\Psi}(X_{K_n}^{(n)}; n, m_n, k_n)^2)$

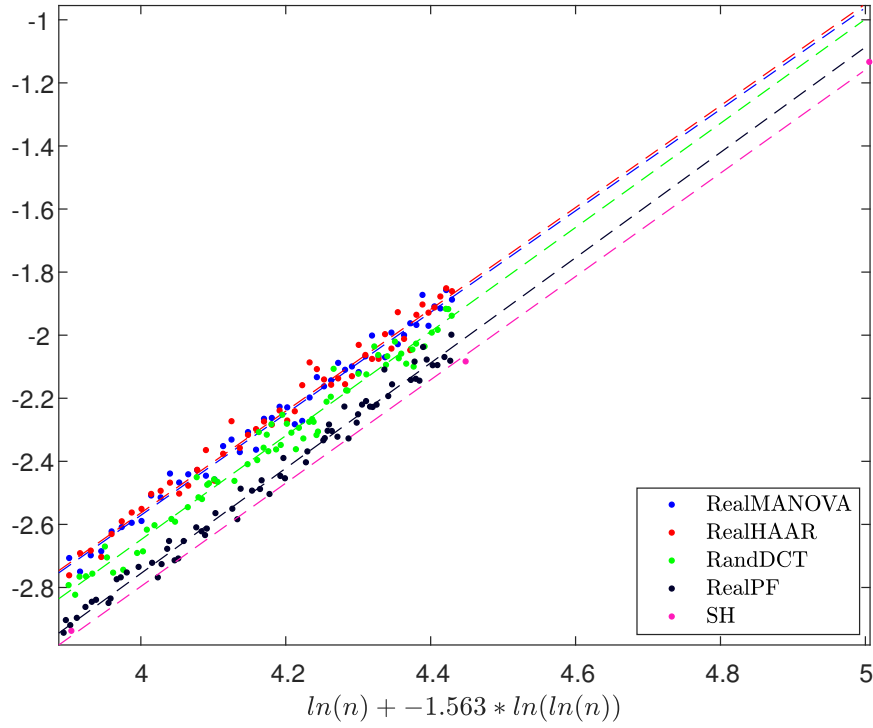

Figure 56: Test 2 for  $\Psi_{cond}$ , real frames  $\gamma = 0.5$  and  $\beta = 0.7$ . Plot shows  $-\ln \mathbb{E}_{K_n}(\Delta_{\Psi}(X_{K_n}^{(n)}; n, m_n, k_n)^2)$

| Frame      | $R^2$   | $\hat{b}$ | $SE(\hat{b})$ | p-value<br>$b = b_{MANOVA}$ |
|------------|---------|-----------|---------------|-----------------------------|
| MANOVA     | 0.98965 | 1.75454   | 0.02589       | 1                           |
| DSS        | 0.99336 | 1.82121   | 0.01833       | 0.03781                     |
| GF         | 0.99997 | 1.75070   | 0.00906       | 0.88906                     |
| ComplexPF  | 0.99371 | 1.74214   | 0.01706       | 0.68996                     |
| Alltop     | 0.99380 | 1.79103   | 0.02391       | 0.30355                     |
| SS         | 0.99076 | 1.78887   | 0.02494       | 0.34209                     |
| HAAR       | 0.99115 | 1.75885   | 0.02398       | 0.90316                     |
| RandDFT    | 0.99260 | 1.73868   | 0.01848       | 0.61896                     |
| RealMANOVA | 0.98402 | 1.60942   | 0.02960       | 1                           |
| RealPF     | 0.98886 | 1.66891   | 0.02197       | 0.10931                     |
| SH         | 0.99944 | 1.63824   | 0.03888       | 0.55800                     |
| RealHAAR   | 0.97847 | 1.61412   | 0.03456       | 0.91781                     |
| RandDCT    | 0.97841 | 1.65074   | 0.03019       | 0.33042                     |

Table 32: Results of Test 2 for  $\Psi_{cond}$ ,  $\gamma = 0.5$  and  $\beta = 0.7$

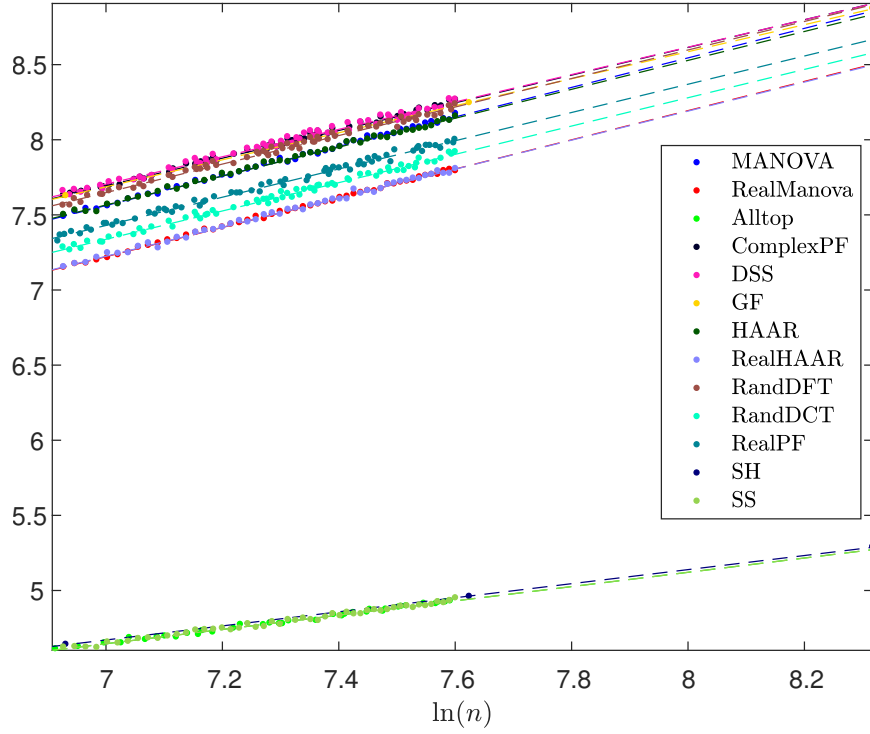

Figure 57: Test 1 for  $\gamma = 0.5$  and  $\beta = 0.9$ . Plot shows  $-\frac{1}{2} \ln \text{Var}_{K_n}(\Delta_{KS}(X_{K_n}^{(n)}; n, m_n, k_n))$  over  $\ln(n)$ .

| Frame      | $R^2$   | $\hat{b}$ | $SE(\hat{b})$ | p-value<br>$b = b_{MANOVA}$ |
|------------|---------|-----------|---------------|-----------------------------|
| MANOVA     | 0.99732 | 0.98259   | 0.00735       | 1                           |
| DSS        | 0.98932 | 0.91180   | 0.01166       | 1.1690e-06                  |
| GF         | 0.99998 | 0.89936   | 0.00381       | 1.6760e-13                  |
| ComplexPF  | 0.99399 | 0.92132   | 0.00882       | 4.8588e-07                  |
| Alltop     | 0.99177 | 0.47542   | 0.00732       | 5.7451e-63                  |
| SS         | 0.98941 | 0.47522   | 0.00710       | 2.7937e-70                  |
| HAAR       | 0.99660 | 0.96236   | 0.00811       | 0.06766                     |
| RandDFT    | 0.99163 | 0.94924   | 0.01074       | 0.01169                     |
| RealMANOVA | 0.99857 | 0.97216   | 0.00531       | 1                           |
| RealPF     | 0.99335 | 0.93988   | 0.00954       | 0.00380                     |
| SH         | 0.99991 | 0.46842   | 0.00455       | 2.2473e-51                  |
| RealHAAR   | 0.99590 | 0.96622   | 0.00895       | 0.56919                     |
| RandDCT    | 0.99255 | 0.94213   | 0.01005       | 0.00939                     |

Table 33: Results of Test 1 for  $\gamma = 0.5$  and  $\beta = 0.9$ .

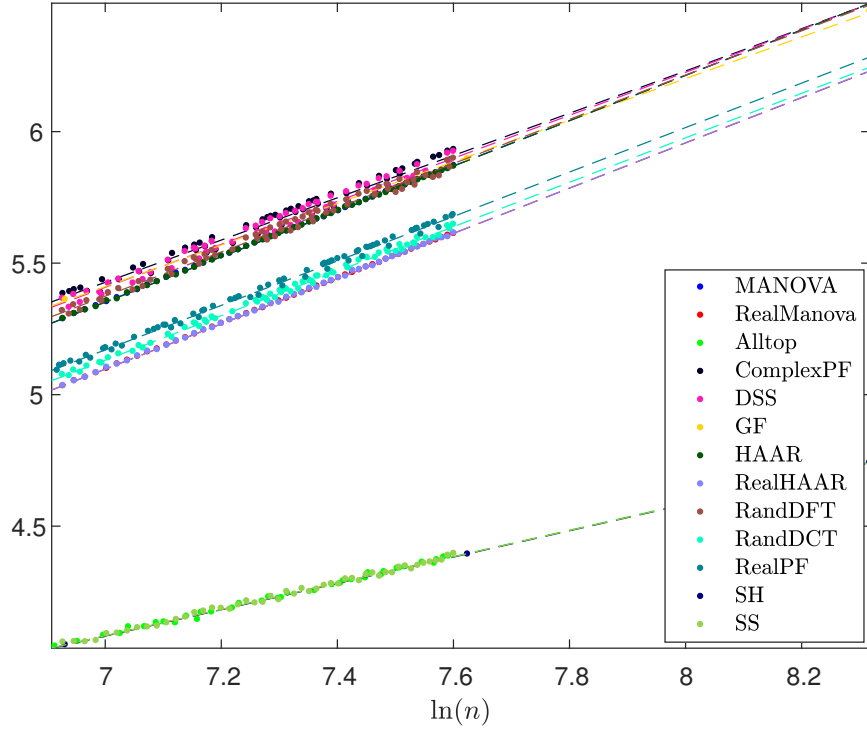

Figure 58: Test 1 for  $\gamma = 0.5$  and  $\beta = 0.9$ . Plot shows  $-\frac{1}{2} \ln \mathbb{E}_{K_n}(\Delta_{KS}(X_{K_n}^{(n)}; n, m_n, k_n)^2)$  over  $\ln(n)$ .

| Frame      | $R^2$   | $\hat{b}$ | $SE(\hat{b})$ | p-value<br>$b = b_{MANOVA}$ |
|------------|---------|-----------|---------------|-----------------------------|
| MANOVA     | 0.99994 | 0.86237   | 0.00092       | 1                           |
| DSS        | 0.98138 | 0.81763   | 0.01386       | 0.00167                     |
| GF         | 0.99980 | 0.79101   | 0.01117       | 6.3477e-08                  |
| ComplexPF  | 0.98209 | 0.80361   | 0.01336       | 2.5626e-05                  |
| Alltop     | 0.99553 | 0.50248   | 0.00569       | 1.6203e-71                  |
| SS         | 0.99450 | 0.50029   | 0.00537       | 4.3414e-82                  |
| HAAR       | 0.99986 | 0.86226   | 0.00147       | 0.94967                     |
| RandDFT    | 0.99072 | 0.84053   | 0.01001       | 0.03190                     |
| RealMANOVA | 0.99996 | 0.86012   | 0.00076       | 1                           |
| RealPF     | 0.99681 | 0.84517   | 0.00593       | 0.01375                     |
| SH         | 0.99998 | 0.50030   | 0.00195       | 7.5424e-70                  |
| RealHAAR   | 0.99972 | 0.86079   | 0.00209       | 0.76526                     |
| RandDCT    | 0.99755 | 0.84547   | 0.00516       | 0.00584                     |

Table 34: Results of Test 1 (MSE) for  $\gamma = 0.5$  and  $\beta = 0.9$ .

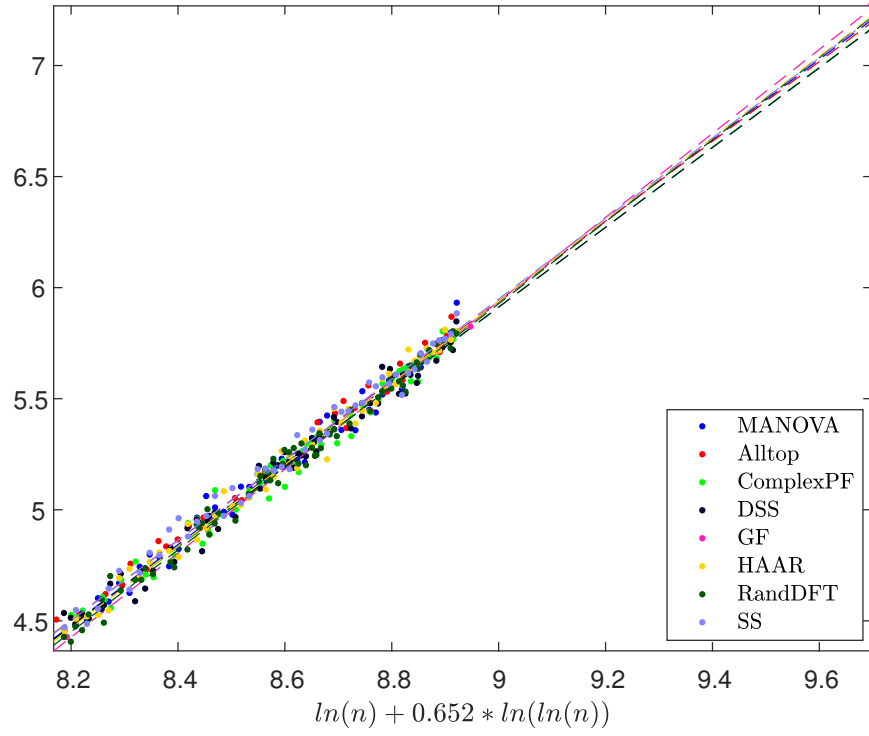

Figure 59: Test 2 for  $\Psi_{AC}$ , complex frames  $\gamma = 0.5$  and  $\beta = 0.9$ . Plot shows  $-\ln \mathbb{E}_{K_n}(\Delta_{\Psi}(X_{K_n}^{(n)}; n, m_n, k_n)^2)$

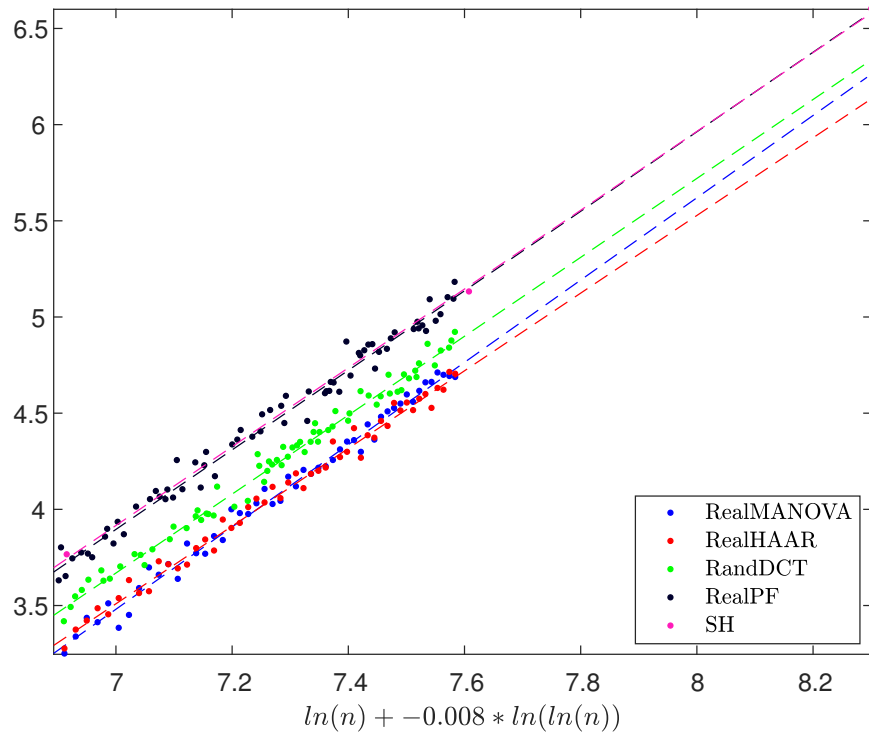

Figure 60: Test 2 for  $\Psi_{AC}$ , real frames  $\gamma = 0.5$  and  $\beta = 0.9$ . Plot shows  $-\ln \mathbb{E}_{K_n}(\Delta_{\Psi}(X_{K_n}^{(n)}; n, m_n, k_n)^2)$

| Frame      | $R^2$   | $\hat{b}$ | $SE(\hat{b})$ | p-value<br>$b = b_{MANOVA}$ |
|------------|---------|-----------|---------------|-----------------------------|
| MANOVA     | 0.98519 | 1.81997   | 0.03221       | 1                           |
| DSS        | 0.98443 | 1.79553   | 0.02779       | 0.56672                     |
| GF         | 0.99985 | 1.88996   | 0.02309       | 0.08366                     |
| ComplexPF  | 0.98608 | 1.80019   | 0.02633       | 0.63532                     |
| Alltop     | 0.98992 | 1.79620   | 0.03064       | 0.59418                     |
| SS         | 0.98759 | 1.80978   | 0.02929       | 0.81535                     |
| HAAR       | 0.98712 | 1.83770   | 0.03030       | 0.68949                     |
| RandDFT    | 0.98865 | 1.84632   | 0.02435       | 0.51546                     |
| RealMANOVA | 0.98846 | 2.13921   | 0.03336       | 1                           |
| RealPF     | 0.98279 | 2.06724   | 0.03393       | 0.13322                     |
| SH         | 0.99955 | 2.04870   | 0.04346       | 0.10490                     |
| RealHAAR   | 0.98836 | 2.01886   | 0.03163       | 0.01028                     |
| RandDCT    | 0.98791 | 2.05145   | 0.02794       | 0.04606                     |

Table 35: Results of Test 2 for  $\Psi_{AC}$ ,  $\gamma = 0.5$  and  $\beta = 0.9$

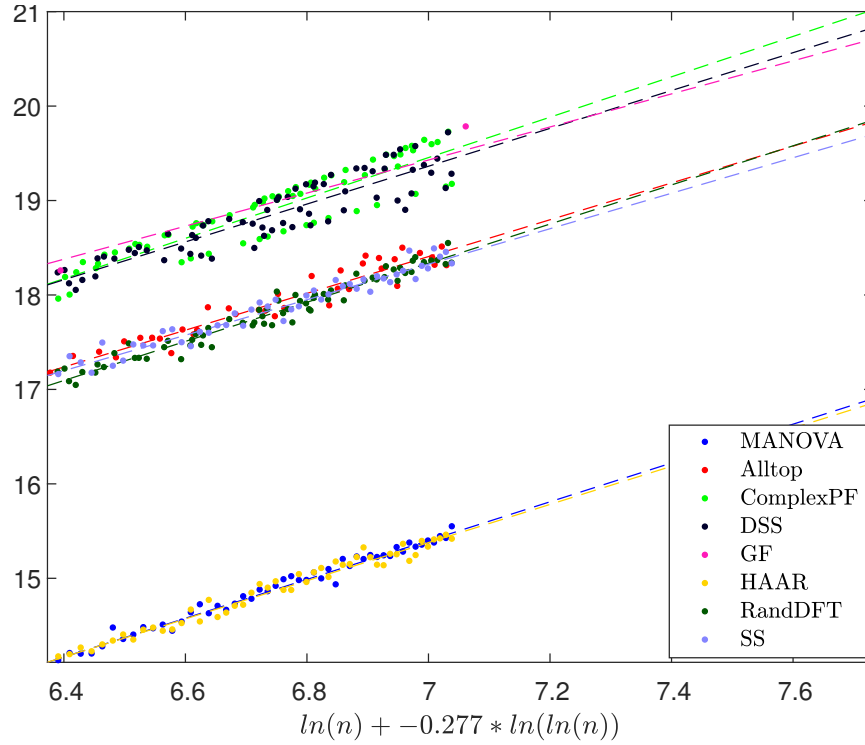

Figure 61: Test 2 for  $\Psi_{Shannon}$ , complex frames  $\gamma = 0.5$  and  $\beta = 0.9$ . Plot shows  $-\ln \mathbb{E}_{K_n}(\Delta_{\Psi}(X_{K_n}^{(n)}; n, m_n, k_n)^2)$



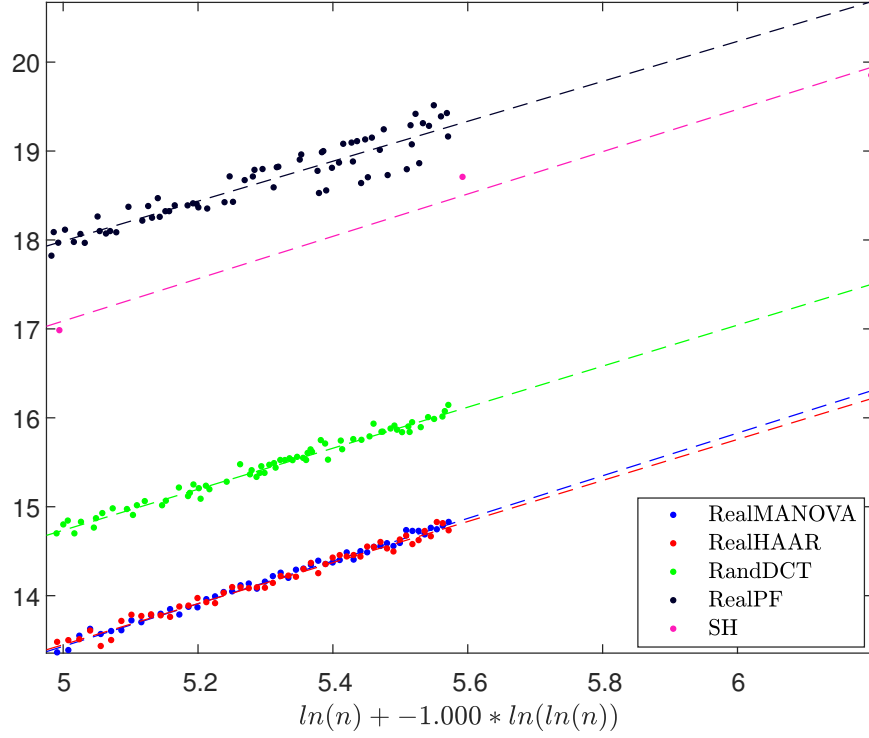

Figure 62: Test 2 for  $\Psi_{Shannon}$ , real frames  $\gamma = 0.5$  and  $\beta = 0.9$ . Plot shows  $-\ln \mathbb{E}_{K_n}(\Delta_{\Psi}(X_{K_n}^{(n)}; n, m_n, k_n)^2)$

| Frame      | $R^2$   | $\hat{b}$ | $SE(\hat{b})$ | p-value<br>$b = b_{MANOVA}$ |
|------------|---------|-----------|---------------|-----------------------------|
| MANOVA     | 0.98341 | 2.05508   | 0.03853       | 1                           |
| DSS        | 0.82831 | 2.00371   | 0.11229       | 0.66607                     |
| GF         | 0.96971 | 1.75044   | 0.30938       | 0.33329                     |
| ComplexPF  | 0.83591 | 2.13794   | 0.11660       | 0.50122                     |
| Alltop     | 0.91820 | 1.94898   | 0.09833       | 0.31796                     |
| SS         | 0.94928 | 1.87912   | 0.06270       | 0.01875                     |
| HAAR       | 0.97204 | 2.01977   | 0.04945       | 0.57450                     |
| RandDFT    | 0.95750 | 2.07089   | 0.05370       | 0.81142                     |
| RealMANOVA | 0.99145 | 2.39788   | 0.03214       | 1                           |
| RealPF     | 0.87309 | 2.24624   | 0.10622       | 0.17453                     |
| SH         | 0.98556 | 2.38035   | 0.28810       | 0.95201                     |
| RealHAAR   | 0.98151 | 2.30834   | 0.04573       | 0.11241                     |
| RandDCT    | 0.97992 | 2.30731   | 0.04066       | 0.08321                     |

Table 36: Results of Test 2 for  $\Psi_{Shannon}$ ,  $\gamma = 0.5$  and  $\beta = 0.9$

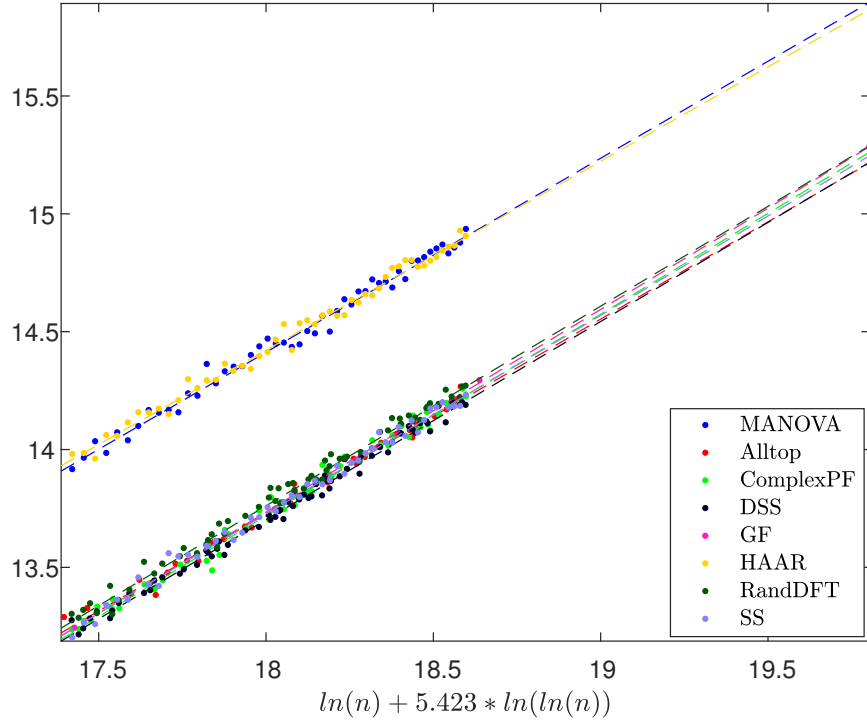

Figure 63: Test 2 for  $\Psi_{RIP}$ , complex frames  $\gamma = 0.5$  and  $\beta = 0.9$ . Plot shows  $-\ln \mathbb{E}_{K_n}(\Delta_\Psi(X_{K_n}^{(n)}; n, m_n, k_n)^2)$

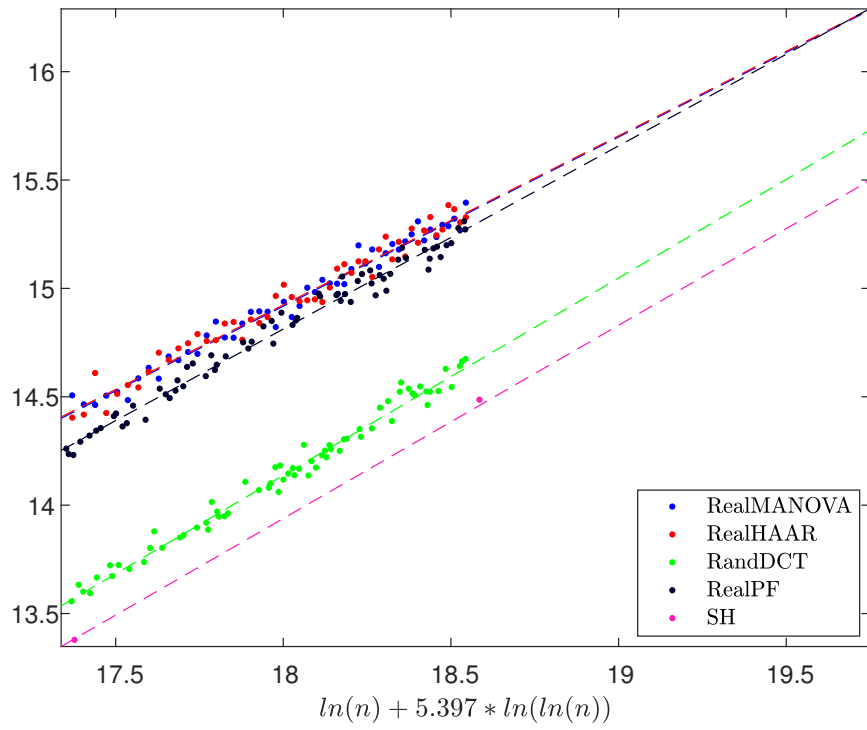

Figure 64: Test 2 for  $\Psi_{RIP}$ , real frames  $\gamma = 0.5$  and  $\beta = 0.9$ . Plot shows  $-\ln \mathbb{E}_{K_n}(\Delta_\Psi(X_{K_n}^{(n)}; n, m_n, k_n)^2)$

| Frame      | $R^2$   | $\hat{b}$ | $SE(\hat{b})$ | p-value<br>$b = b_{MANOVA}$ |
|------------|---------|-----------|---------------|-----------------------------|
| MANOVA     | 0.98831 | 0.82317   | 0.01292       | 1                           |
| DSS        | 0.99260 | 0.84095   | 0.00894       | 0.26042                     |
| GF         | 0.99997 | 0.85981   | 0.00484       | 0.01069                     |
| ComplexPF  | 0.98990 | 0.85543   | 0.01064       | 0.05647                     |
| Alltop     | 0.99162 | 0.82576   | 0.01283       | 0.88732                     |
| SS         | 0.99209 | 0.84278   | 0.01086       | 0.24837                     |
| HAAR       | 0.98958 | 0.80122   | 0.01187       | 0.21385                     |
| RandDFT    | 0.98969 | 0.84711   | 0.01064       | 0.15548                     |
| RealMANOVA | 0.97813 | 0.78081   | 0.01685       | 1                           |
| RealPF     | 0.98156 | 0.84519   | 0.01437       | 0.00440                     |
| SH         | 0.99970 | 0.89155   | 0.01539       | 1.2847e-05                  |
| RealHAAR   | 0.96869 | 0.78013   | 0.02024       | 0.97956                     |
| RandDCT    | 0.98305 | 0.90978   | 0.01470       | 7.0613e-08                  |

Table 37: Results of Test 2 for  $\Psi_{RIP}$ ,  $\gamma = 0.5$  and  $\beta = 0.9$

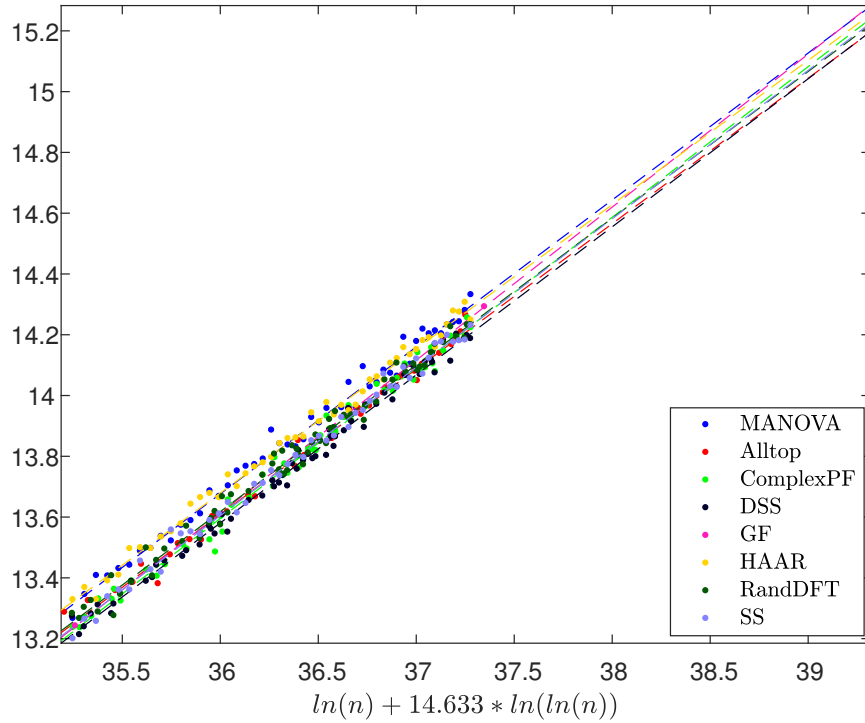

Figure 65: Test 2 for  $\Psi_{max}$ , complex frames  $\gamma = 0.5$  and  $\beta = 0.9$ . Plot shows  $-\ln \mathbb{E}_{K_n}(\Delta_{\Psi}(X_{K_n}^{(n)}; n, m_n, k_n)^2)$

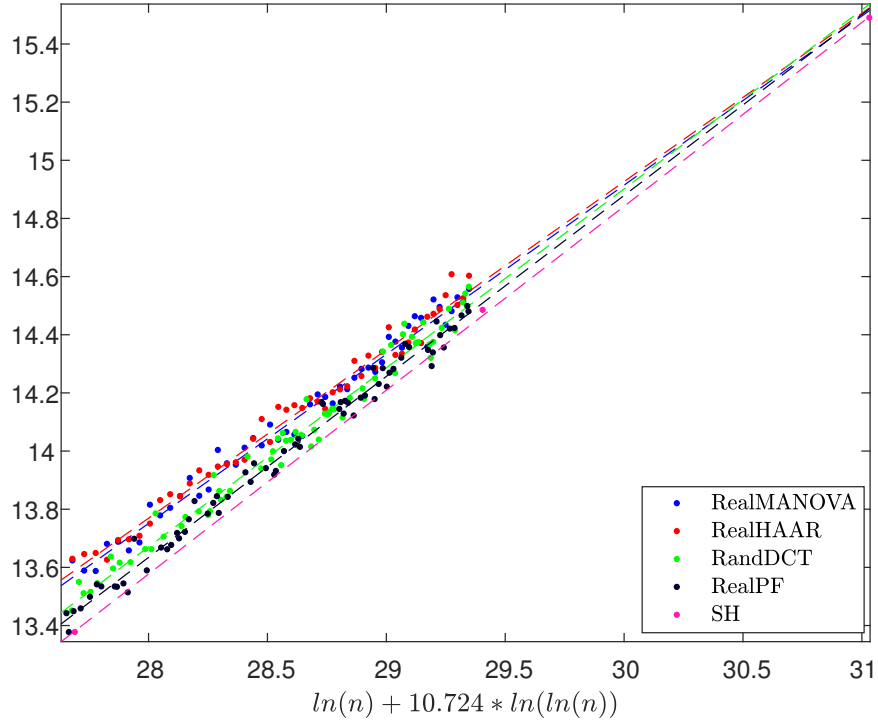

Figure 66: Test 2 for  $\Psi_{max}$ , real frames  $\gamma = 0.5$  and  $\beta = 0.9$ . Plot shows  $-\ln \mathbb{E}_{K_n}(\Delta_{\Psi}(X_{K_n}^{(n)}; n, m_n, k_n)^2)$

| Frame      | $R^2$   | $\hat{b}$ | $SE(\hat{b})$ | p-value<br>$b = b_{MANOVA}$ |
|------------|---------|-----------|---------------|-----------------------------|
| MANOVA     | 0.98860 | 0.48357   | 0.00750       | 1                           |
| DSS        | 0.99251 | 0.48723   | 0.00521       | 0.68865                     |
| GF         | 1.00000 | 0.50364   | 0.00036       | 0.01013                     |
| ComplexPF  | 0.98987 | 0.49566   | 0.00617       | 0.21561                     |
| Alltop     | 0.99142 | 0.47856   | 0.00752       | 0.63875                     |
| SS         | 0.99217 | 0.48847   | 0.00626       | 0.61688                     |
| HAAR       | 0.99308 | 0.47461   | 0.00572       | 0.34463                     |
| RandDFT    | 0.98890 | 0.48284   | 0.00630       | 0.94092                     |
| RealMANOVA | 0.98303 | 0.58172   | 0.01103       | 1                           |
| RealPF     | 0.98749 | 0.62242   | 0.00869       | 0.00451                     |
| SH         | 0.99984 | 0.63242   | 0.00809       | 5.3680e-04                  |
| RealHAAR   | 0.98397 | 0.57885   | 0.01066       | 0.85218                     |
| RandDCT    | 0.97938 | 0.61567   | 0.01100       | 0.03136                     |

Table 38: Results of Test 2 for  $\Psi_{max}$ ,  $\gamma = 0.5$  and  $\beta = 0.9$

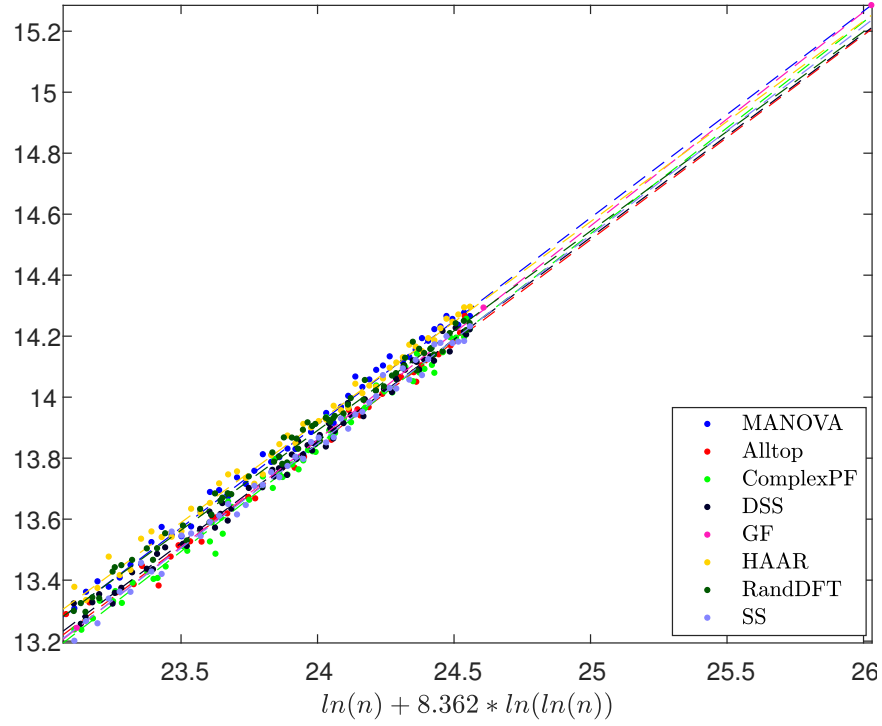

Figure 67: Test 2 for  $\Psi_{min}$ , complex frames  $\gamma = 0.5$  and  $\beta = 0.9$ . Plot shows  $-\ln \mathbb{E}_{K_n}(\Delta_{\Psi}(X_{K_n}^{(n)}; n, m_n, k_n)^2)$

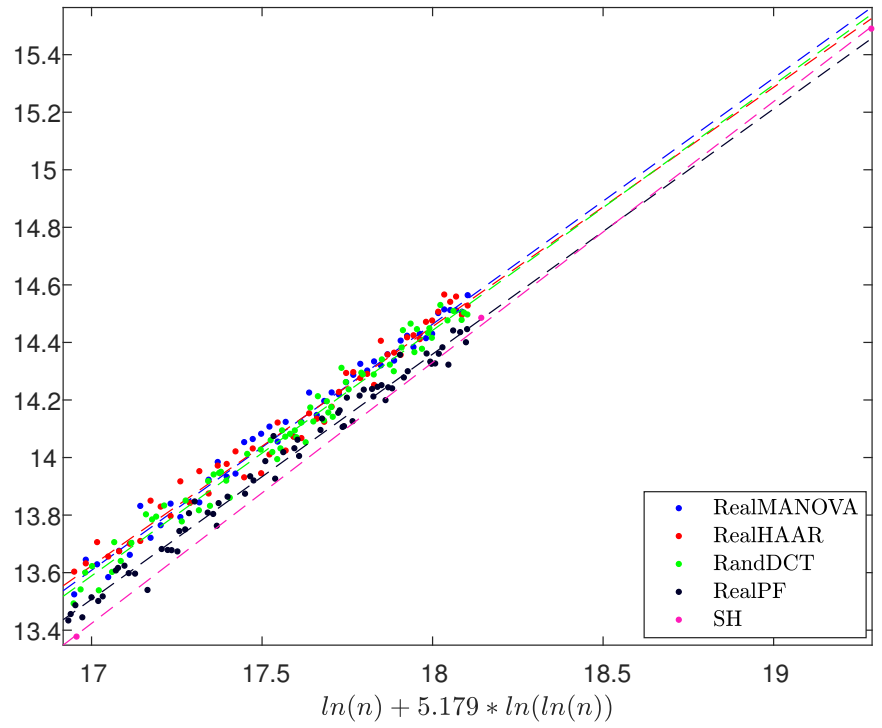

Figure 68: Test 2 for  $\Psi_{min}$ , real frames  $\gamma = 0.5$  and  $\beta = 0.9$ . Plot shows  $-\ln \mathbb{E}_{K_n}(\Delta_{\Psi}(X_{K_n}^{(n)}; n, m_n, k_n)^2)$

| Frame      | $R^2$   | $\hat{b}$ | $SE(\hat{b})$ | p-value<br>$b = b_{MANOVA}$ |
|------------|---------|-----------|---------------|-----------------------------|
| MANOVA     | 0.99144 | 0.67766   | 0.00909       | 1                           |
| DSS        | 0.99275 | 0.66805   | 0.00703       | 0.40499                     |
| GF         | 0.99999 | 0.70150   | 0.00197       | 0.01346                     |
| ComplexPF  | 0.98989 | 0.69455   | 0.00864       | 0.18061                     |
| Alltop     | 0.99153 | 0.67052   | 0.01047       | 0.60836                     |
| SS         | 0.99213 | 0.68437   | 0.00880       | 0.59690                     |
| HAAR       | 0.99182 | 0.65770   | 0.00862       | 0.11445                     |
| RandDFT    | 0.99047 | 0.65376   | 0.00789       | 0.04952                     |
| RealMANOVA | 0.98532 | 0.85518   | 0.01507       | 1                           |
| RealPF     | 0.98463 | 0.85215   | 0.01321       | 0.88004                     |
| SH         | 0.99969 | 0.90673   | 0.01589       | 0.02263                     |
| RealHAAR   | 0.97575 | 0.83153   | 0.01892       | 0.33067                     |
| RandDCT    | 0.97957 | 0.85324   | 0.01517       | 0.92762                     |

Table 39: Results of Test 2 for  $\Psi_{min}$ ,  $\gamma = 0.5$  and  $\beta = 0.9$

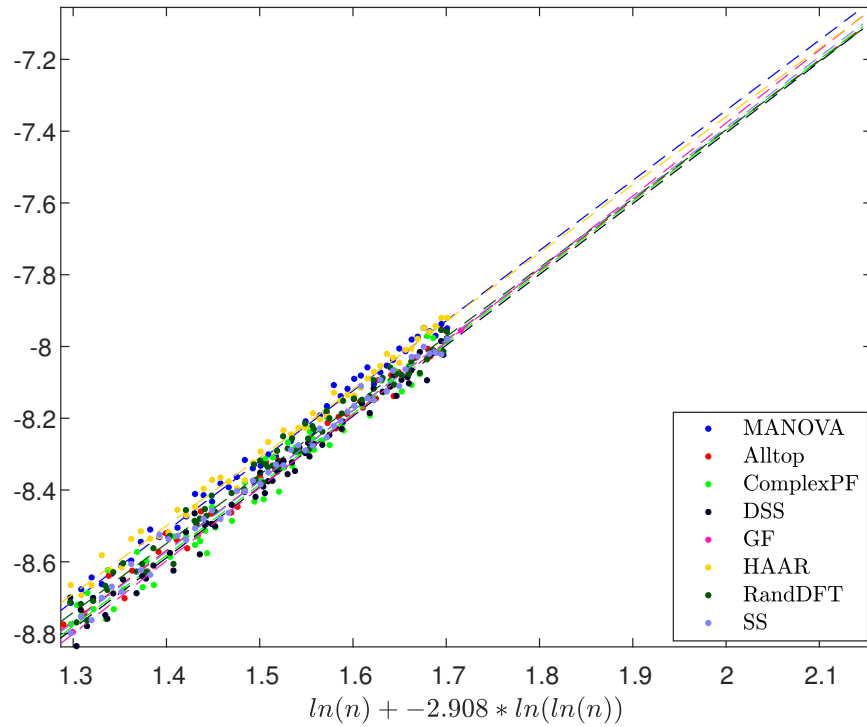

Figure 69: Test 2 for  $\Psi_{cond}$ , complex frames  $\gamma = 0.5$  and  $\beta = 0.9$ . Plot shows  $-\ln \mathbb{E}_{K_n}(\Delta_{\Psi}(X_{K_n}^{(n)}; n, m_n, k_n)^2)$

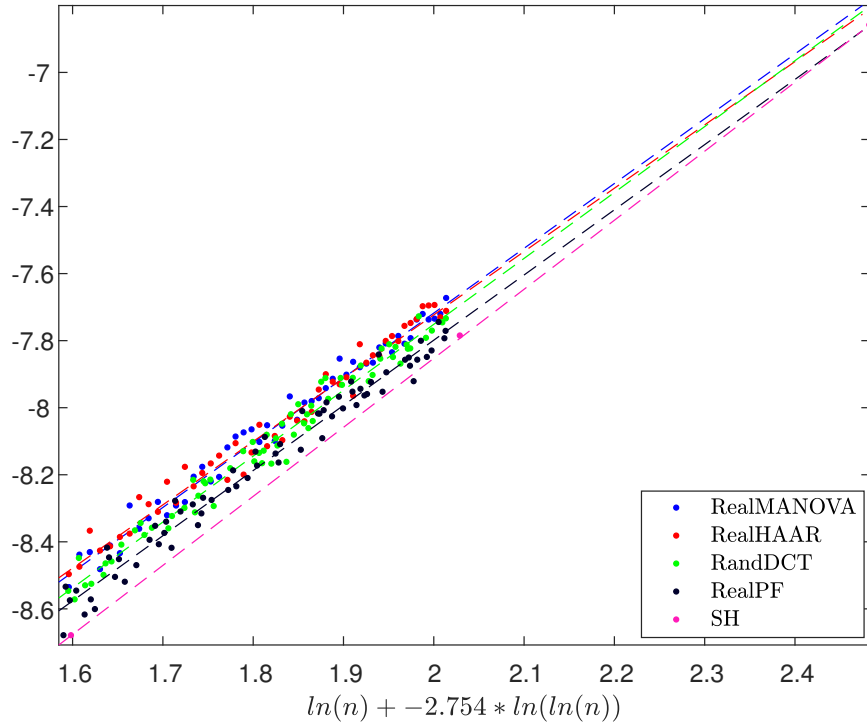

Figure 70: Test 2 for  $\Psi_{cond}$ , real frames  $\gamma = 0.5$  and  $\beta = 0.9$ . Plot shows  $-\ln \mathbb{E}_{K_n}(\Delta_{\Psi}(X_{K_n}^{(n)}; n, m_n, k_n)^2)$

| Frame      | $R^2$   | $\hat{b}$ | $SE(\hat{b})$ | p-value<br>$b = b_{MANOVA}$ |
|------------|---------|-----------|---------------|-----------------------------|
| MANOVA     | 0.99113 | 1.95395   | 0.02668       | 1                           |
| DSS        | 0.98283 | 1.97382   | 0.03212       | 0.63499                     |
| GF         | 0.99999 | 2.03289   | 0.00687       | 0.00612                     |
| ComplexPF  | 0.97497 | 1.97360   | 0.03892       | 0.67791                     |
| Alltop     | 0.98906 | 1.95346   | 0.03472       | 0.99102                     |
| SS         | 0.99170 | 1.96955   | 0.02601       | 0.67635                     |
| HAAR       | 0.99186 | 1.90046   | 0.02485       | 0.14566                     |
| RandDFT    | 0.98624 | 1.92154   | 0.02794       | 0.40323                     |
| RealMANOVA | 0.98364 | 1.93223   | 0.03597       | 1                           |
| RealPF     | 0.97535 | 1.94418   | 0.03834       | 0.82068                     |
| SH         | 0.99998 | 2.05891   | 0.00950       | 0.00133                     |
| RealHAAR   | 0.97542 | 1.88870   | 0.04328       | 0.44108                     |
| RandDCT    | 0.97893 | 1.96572   | 0.03550       | 0.50885                     |

Table 40: Results of Test 2 for  $\Psi_{cond}$ ,  $\gamma = 0.5$  and  $\beta = 0.9$

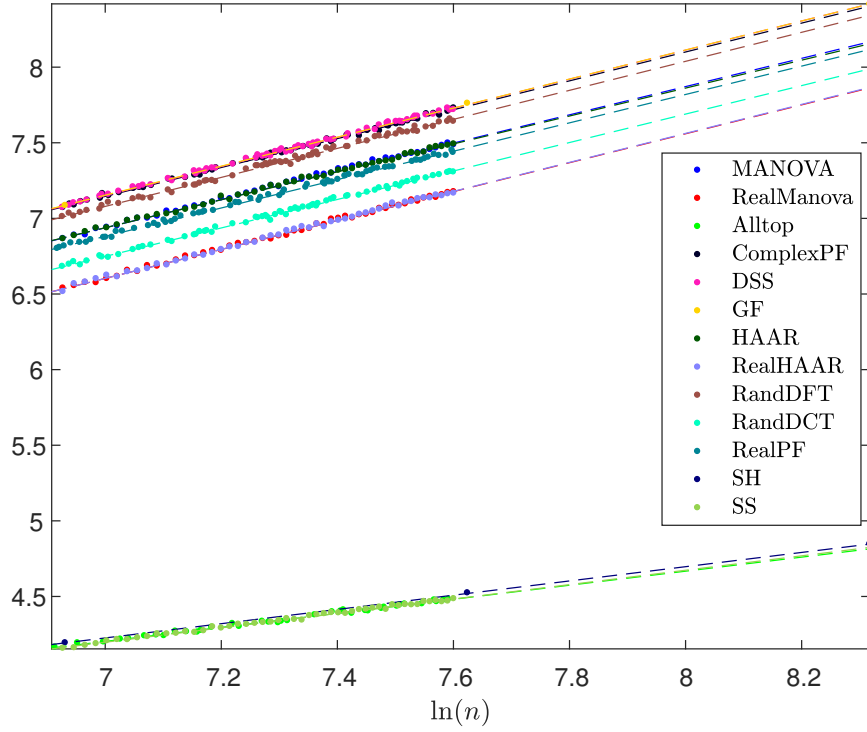

Figure 71: Test 1 for  $\gamma = 0.5$  and  $\beta = 0.5$ . Plot shows  $-\frac{1}{2} \ln \text{Var}_{K_n}(\Delta_{KS}(X_{K_n}^{(n)}; n, m_n, k_n))$  over  $\ln(n)$ .

| Frame      | $R^2$   | $\hat{b}$ | $SE(\hat{b})$ | p-value<br>$b = b_{MANOVA}$ |
|------------|---------|-----------|---------------|-----------------------------|
| MANOVA     | 0.99815 | 0.93372   | 0.00581       | 1                           |
| DSS        | 0.99783 | 0.96204   | 0.00552       | 5.9380e-04                  |
| GF         | 0.99992 | 0.96006   | 0.00868       | 0.01495                     |
| ComplexPF  | 0.99816 | 0.95481   | 0.00504       | 0.00710                     |
| Alltop     | 0.99175 | 0.46436   | 0.00716       | 2.2425e-64                  |
| SS         | 0.99472 | 0.47605   | 0.00500       | 1.0496e-77                  |
| HAAR       | 0.99784 | 0.92333   | 0.00620       | 0.22425                     |
| RandDFT    | 0.99614 | 0.95936   | 0.00735       | 0.00721                     |
| RealMANOVA | 0.99789 | 0.95624   | 0.00634       | 1                           |
| RealPF     | 0.99818 | 0.93809   | 0.00497       | 0.02620                     |
| SH         | 0.99995 | 0.47116   | 0.00332       | 4.2284e-50                  |
| RealHAAR   | 0.99734 | 0.95888   | 0.00715       | 0.78370                     |
| RandDCT    | 0.99763 | 0.94122   | 0.00564       | 0.07938                     |

Table 41: Results of Test 1 for  $\gamma = 0.5$  and  $\beta = 0.5$ .



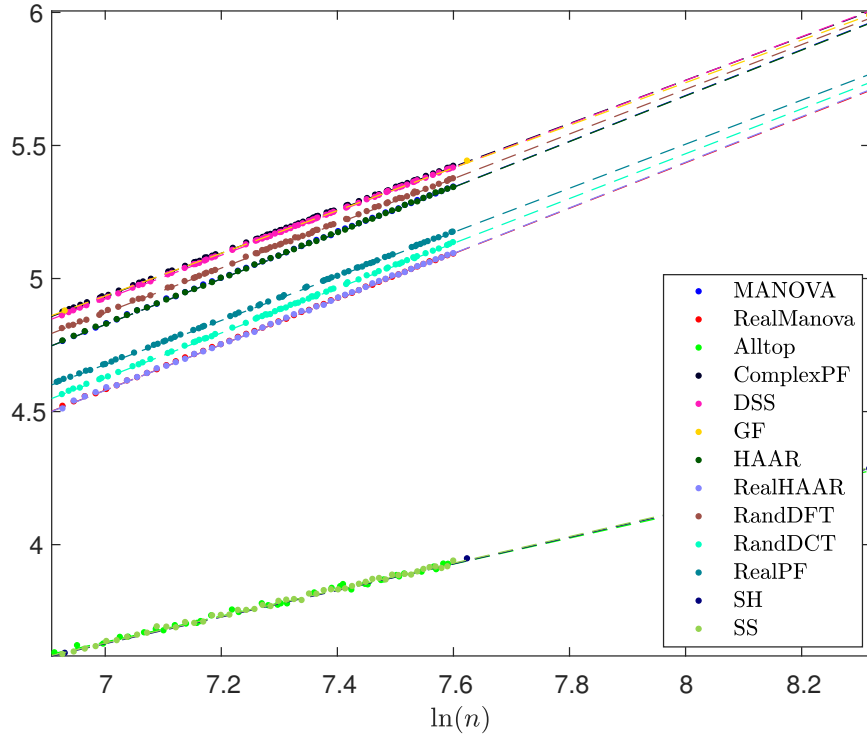

Figure 72: Test 1 for  $\gamma = 0.5$  and  $\beta = 0.5$ . Plot shows  $-\frac{1}{2} \ln \mathbb{E}_{K_n}(\Delta_{KS}(X_{K_n}^{(n)}; n, m_n, k_n)^2)$  over  $\ln(n)$ .

| Frame      | $R^2$   | $\hat{b}$ | $SE(\hat{b})$ | p-value<br>$b = b_{MANOVA}$ |
|------------|---------|-----------|---------------|-----------------------------|
| MANOVA     | 0.99993 | 0.86072   | 0.00103       | 1                           |
| DSS        | 0.99994 | 0.82123   | 0.00078       | 8.4214e-57                  |
| GF         | 0.99994 | 0.80128   | 0.00645       | 4.2150e-12                  |
| ComplexPF  | 0.99995 | 0.81250   | 0.00071       | 2.5915e-67                  |
| Alltop     | 0.99486 | 0.48805   | 0.00593       | 3.0106e-71                  |
| SS         | 0.99648 | 0.50058   | 0.00430       | 1.9215e-90                  |
| HAAR       | 0.99990 | 0.85941   | 0.00125       | 0.42153                     |
| RandDFT    | 0.99982 | 0.83974   | 0.00139       | 2.7976e-22                  |
| RealMANOVA | 0.99993 | 0.85472   | 0.00104       | 1                           |
| RealPF     | 0.99997 | 0.82798   | 0.00060       | 4.7676e-43                  |
| SH         | 0.99980 | 0.49985   | 0.00714       | 2.3203e-43                  |
| RealHAAR   | 0.99970 | 0.85719   | 0.00213       | 0.29928                     |
| RandDCT    | 0.99990 | 0.84206   | 0.00105       | 6.5828e-14                  |

Table 42: Results of Test 1 (MSE) for  $\gamma = 0.5$  and  $\beta = 0.5$ .

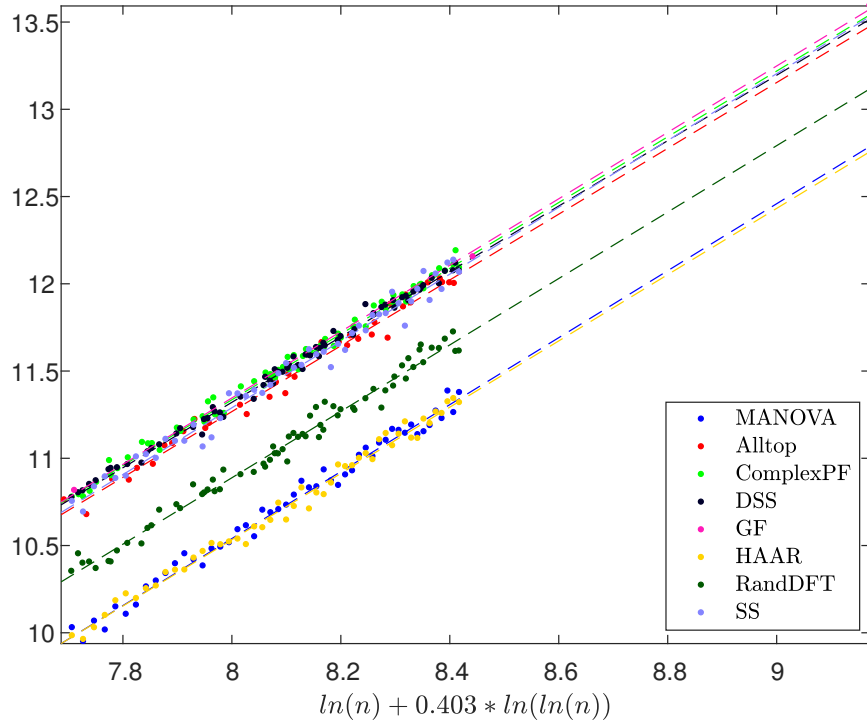

Figure 73: Test 2 for  $\Psi_{AC}$ , complex frames  $\gamma = 0.5$  and  $\beta = 0.5$ . Plot shows  $-\ln \mathbb{E}_{K_n}(\Delta_{\Psi}(X_{K_n}^{(n)}; n, m_n, k_n)^2)$

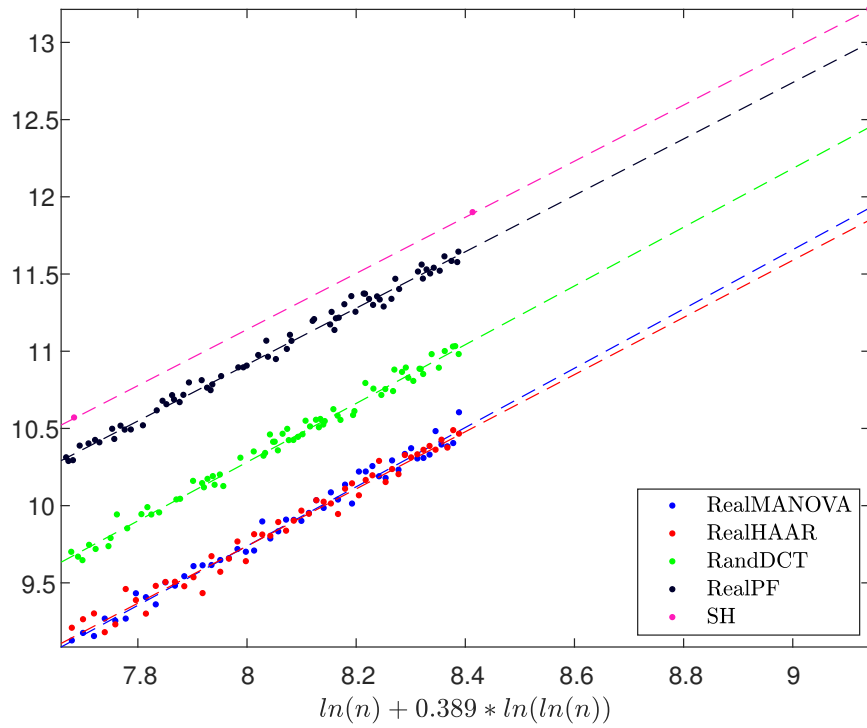

Figure 74: Test 2 for  $\Psi_{AC}$ , real frames  $\gamma = 0.5$  and  $\beta = 0.5$ . Plot shows  $-\ln \mathbb{E}_{K_n}(\Delta_{\Psi}(X_{K_n}^{(n)}; n, m_n, k_n)^2)$

| Frame      | $R^2$   | $\hat{b}$ | $SE(\hat{b})$ | p-value<br>$b = b_{MANOVA}$ |
|------------|---------|-----------|---------------|-----------------------------|
| MANOVA     | 0.98768 | 1.91916   | 0.03094       | 1                           |
| DSS        | 0.99415 | 1.87450   | 0.01770       | 0.21274                     |
| GF         | 0.99951 | 1.90258   | 0.04203       | 0.75204                     |
| ComplexPF  | 0.99217 | 1.88385   | 0.02060       | 0.34409                     |
| Alltop     | 0.98534 | 1.88572   | 0.03888       | 0.50280                     |
| SS         | 0.98094 | 1.91456   | 0.03852       | 0.92601                     |
| HAAR       | 0.98947 | 1.89891   | 0.02827       | 0.62998                     |
| RandDFT    | 0.98291 | 1.90320   | 0.03089       | 0.71563                     |
| RealMANOVA | 0.98476 | 1.91927   | 0.03447       | 1                           |
| RealPF     | 0.98984 | 1.82658   | 0.02295       | 0.02716                     |
| SH         | 1.00000 | 1.81680   | 0.00241       | 0.00465                     |
| RealHAAR   | 0.97811 | 1.85068   | 0.03996       | 0.19682                     |
| RandDCT    | 0.98731 | 1.90189   | 0.02654       | 0.69022                     |

Table 43: Results of Test 2 for  $\Psi_{AC}$ ,  $\gamma = 0.5$  and  $\beta = 0.5$

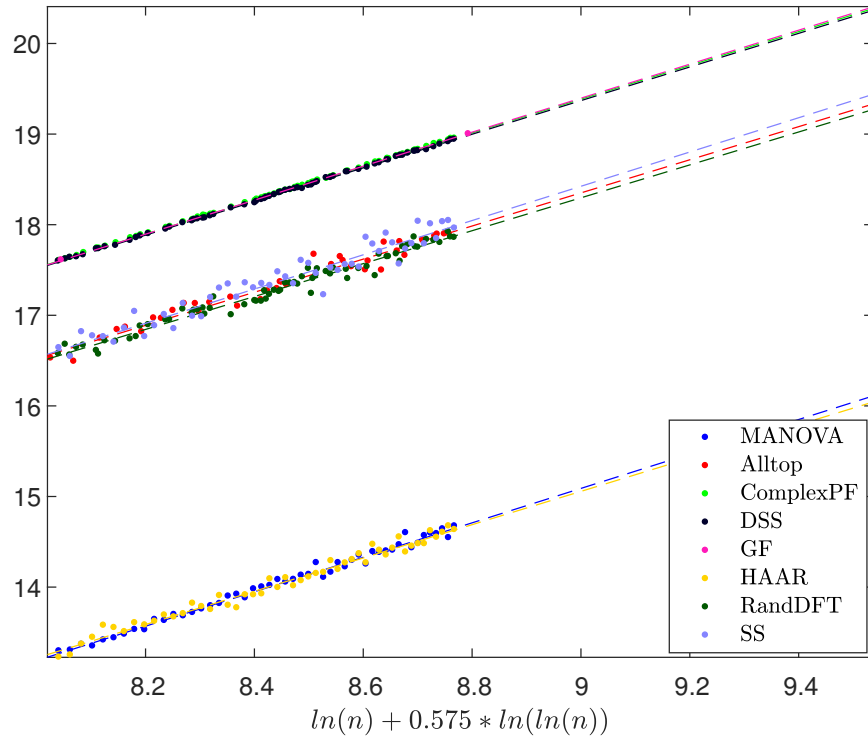

Figure 75: Test 2 for  $\Psi_{Shannon}$ , complex frames  $\gamma = 0.5$  and  $\beta = 0.5$ . Plot shows  $-\ln \mathbb{E}_{K_n} (\Delta_{\Psi}(X_{K_n}^{(n)}; n, m_n, k_n)^2)$

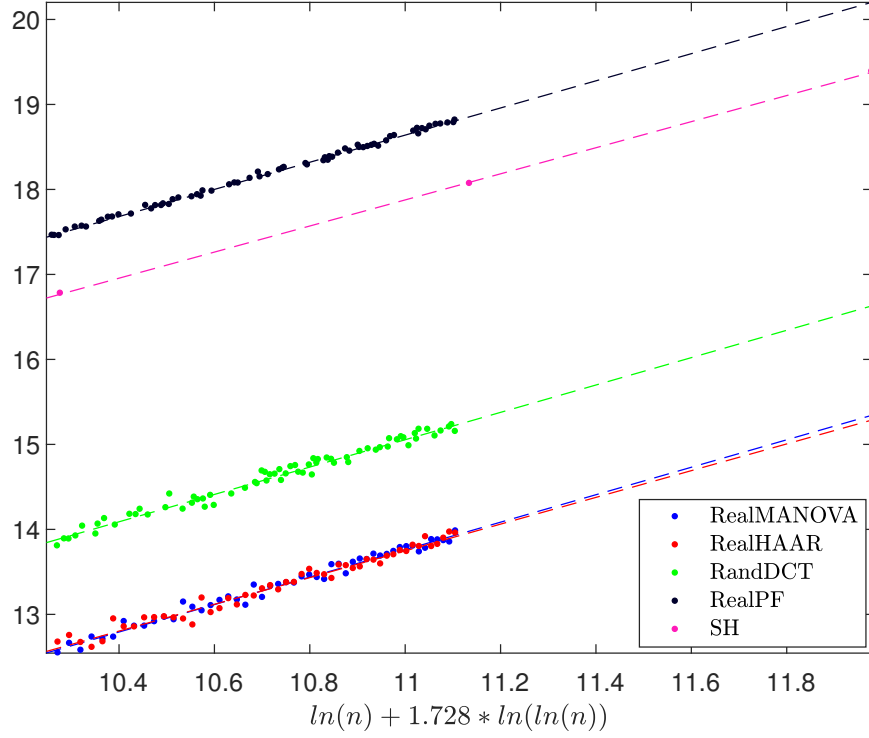

Figure 76: Test 2 for  $\Psi_{Shannon}$ , real frames  $\gamma = 0.5$  and  $\beta = 0.5$ . Plot shows  $-\ln \mathbb{E}_{K_n}(\Delta_{\Psi}(X_{K_n}^{(n)}; n, m_n, k_n)^2)$

| Frame      | $R^2$   | $\hat{b}$ | $SE(\hat{b})$ | p-value<br>$b = b_{MANOVA}$ |
|------------|---------|-----------|---------------|-----------------------------|
| MANOVA     | 0.98997 | 1.90079   | 0.02761       | 1                           |
| DSS        | 0.99950 | 1.85589   | 0.00513       | 0.11268                     |
| GF         | 0.99998 | 1.87611   | 0.00907       | 0.39999                     |
| ComplexPF  | 0.99988 | 1.86216   | 0.00250       | 0.16629                     |
| Alltop     | 0.95969 | 1.82753   | 0.06331       | 0.29190                     |
| SS         | 0.93263 | 1.89080   | 0.07335       | 0.89882                     |
| HAAR       | 0.97883 | 1.83752   | 0.03900       | 0.18867                     |
| RandDFT    | 0.97247 | 1.81594   | 0.03761       | 0.07161                     |
| RealMANOVA | 0.98363 | 1.61553   | 0.03008       | 1                           |
| RealPF     | 0.99750 | 1.59706   | 0.00991       | 0.56099                     |
| SH         | 0.99988 | 1.53491   | 0.01669       | 0.02322                     |
| RealHAAR   | 0.97400 | 1.57295   | 0.03709       | 0.37490                     |
| RandDCT    | 0.97852 | 1.60953   | 0.02935       | 0.88673                     |

Table 44: Results of Test 2 for  $\Psi_{Shannon}$ ,  $\gamma = 0.5$  and  $\beta = 0.5$

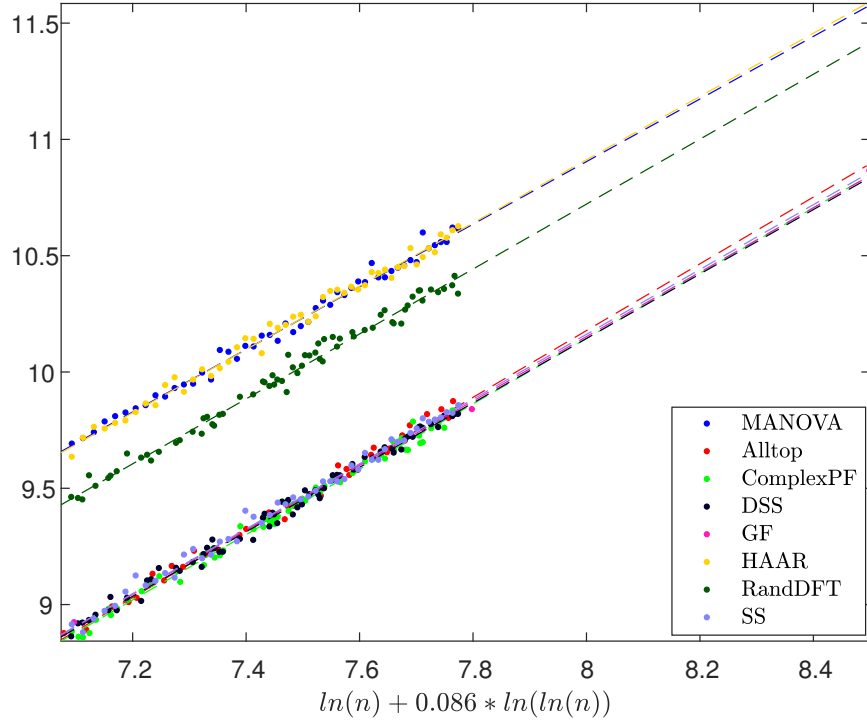

Figure 77: Test 2 for  $\Psi_{RIP}$ , complex frames  $\gamma = 0.5$  and  $\beta = 0.5$ . Plot shows  $-\ln \mathbb{E}_{K_n}(\Delta_\Psi(X_{K_n}^{(n)}; n, m_n, k_n)^2)$

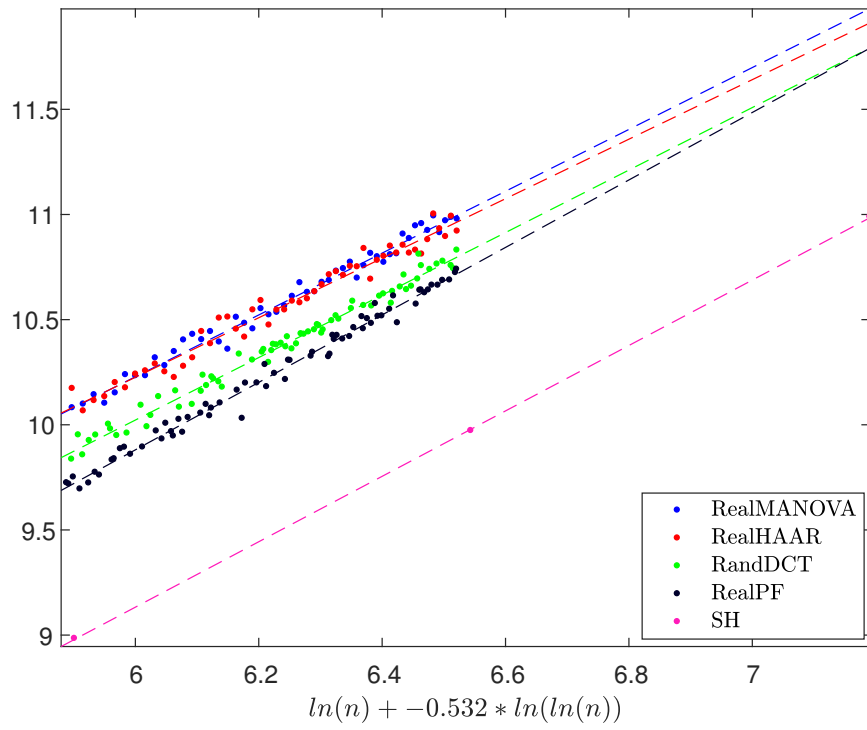

Figure 78: Test 2 for  $\Psi_{RIP}$ , real frames  $\gamma = 0.5$  and  $\beta = 0.5$ . Plot shows  $-\ln \mathbb{E}_{K_n}(\Delta_\Psi(X_{K_n}^{(n)}; n, m_n, k_n)^2)$

| Frame      | $R^2$   | $\hat{b}$ | $SE(\hat{b})$ | p-value<br>$b = b_{MANOVA}$ |
|------------|---------|-----------|---------------|-----------------------------|
| MANOVA     | 0.99097 | 1.34583   | 0.01855       | 1                           |
| DSS        | 0.99167 | 1.38541   | 0.01563       | 0.10551                     |
| GF         | 0.99892 | 1.38508   | 0.04556       | 0.42884                     |
| ComplexPF  | 0.99232 | 1.40459   | 0.01521       | 0.01583                     |
| Alltop     | 0.99232 | 1.43513   | 0.02134       | 0.00222                     |
| SS         | 0.99200 | 1.39393   | 0.01807       | 0.06631                     |
| HAAR       | 0.98923 | 1.36011   | 0.02048       | 0.60663                     |
| RandDFT    | 0.98709 | 1.39582   | 0.01965       | 0.06692                     |
| RealMANOVA | 0.98361 | 1.47043   | 0.02740       | 1                           |
| RealPF     | 0.98804 | 1.60428   | 0.02189       | 2.2133e-04                  |
| SH         | 0.99996 | 1.55534   | 0.00972       | 0.00527                     |
| RealHAAR   | 0.96952 | 1.41522   | 0.03622       | 0.22706                     |
| RandDCT    | 0.98346 | 1.48602   | 0.02372       | 0.66788                     |

Table 45: Results of Test 2 for  $\Psi_{RIP}$ ,  $\gamma = 0.5$  and  $\beta = 0.5$

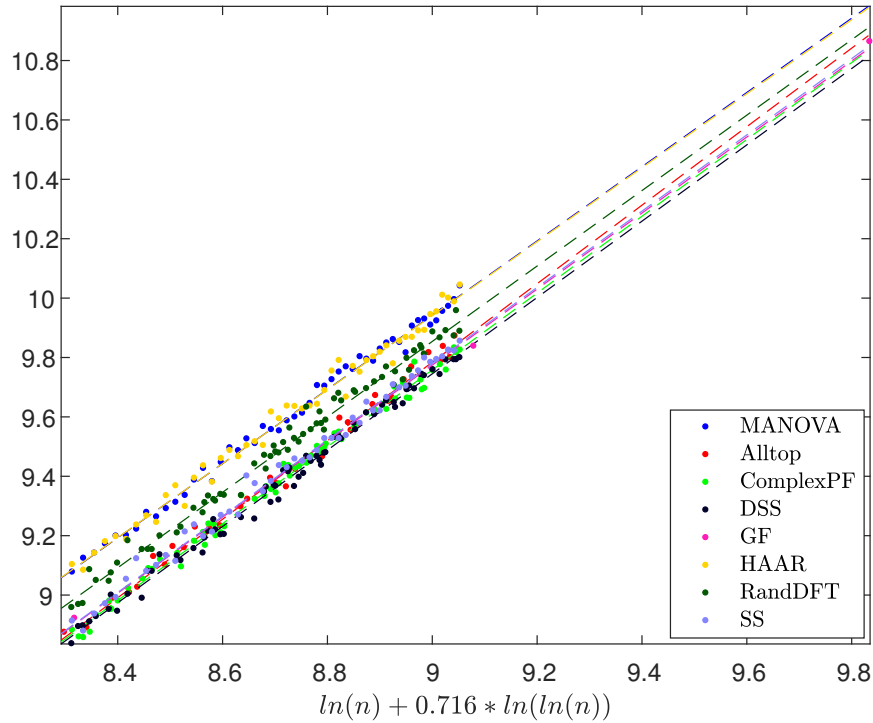

Figure 79: Test 2 for  $\Psi_{max}$ , complex frames  $\gamma = 0.5$  and  $\beta = 0.5$ . Plot shows  $-\ln \mathbb{E}_{K_n}(\Delta_{\Psi}(X_{K_n}^{(n)}; n, m_n, k_n)^2)$

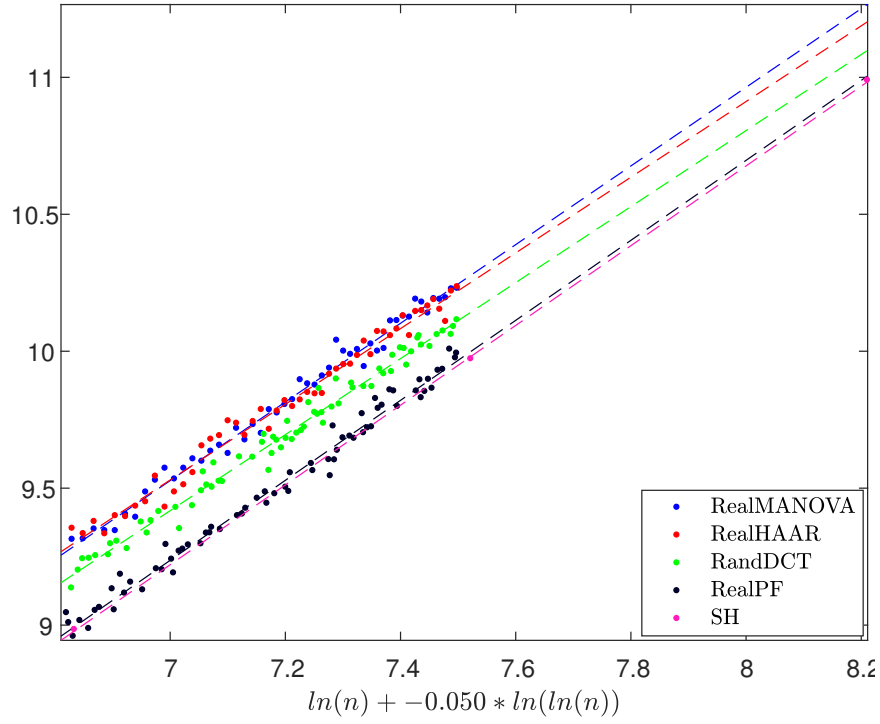

Figure 80: Test 2 for  $\Psi_{max}$ , real frames  $\gamma = 0.5$  and  $\beta = 0.5$ . Plot shows  $-\ln \mathbb{E}_{K_n}(\Delta_{\Psi}(X_{K_n}^{(n)}; n, m_n, k_n)^2)$

| Frame      | $R^2$   | $\hat{b}$ | $SE(\hat{b})$ | p-value<br>$b = b_{MANOVA}$ |
|------------|---------|-----------|---------------|-----------------------------|
| MANOVA     | 0.99381 | 1.24983   | 0.01424       | 1                           |
| DSS        | 0.99198 | 1.28493   | 0.01422       | 0.08385                     |
| GF         | 0.99879 | 1.28006   | 0.04463       | 0.52169                     |
| ComplexPF  | 0.99236 | 1.29373   | 0.01397       | 0.02979                     |
| Alltop     | 0.99229 | 1.32193   | 0.01969       | 0.00393                     |
| SS         | 0.99200 | 1.28399   | 0.01664       | 0.12211                     |
| HAAR       | 0.98758 | 1.24563   | 0.02016       | 0.86548                     |
| RandDFT    | 0.98870 | 1.27007   | 0.01671       | 0.35861                     |
| RealMANOVA | 0.98757 | 1.43603   | 0.02326       | 1                           |
| RealPF     | 0.98640 | 1.46036   | 0.02127       | 0.44172                     |
| SH         | 0.99994 | 1.45616   | 0.01173       | 0.44326                     |
| RealHAAR   | 0.98180 | 1.38177   | 0.02715       | 0.13239                     |
| RandDCT    | 0.98322 | 1.38786   | 0.02232       | 0.13786                     |

Table 46: Results of Test 2 for  $\Psi_{max}$ ,  $\gamma = 0.5$  and  $\beta = 0.5$

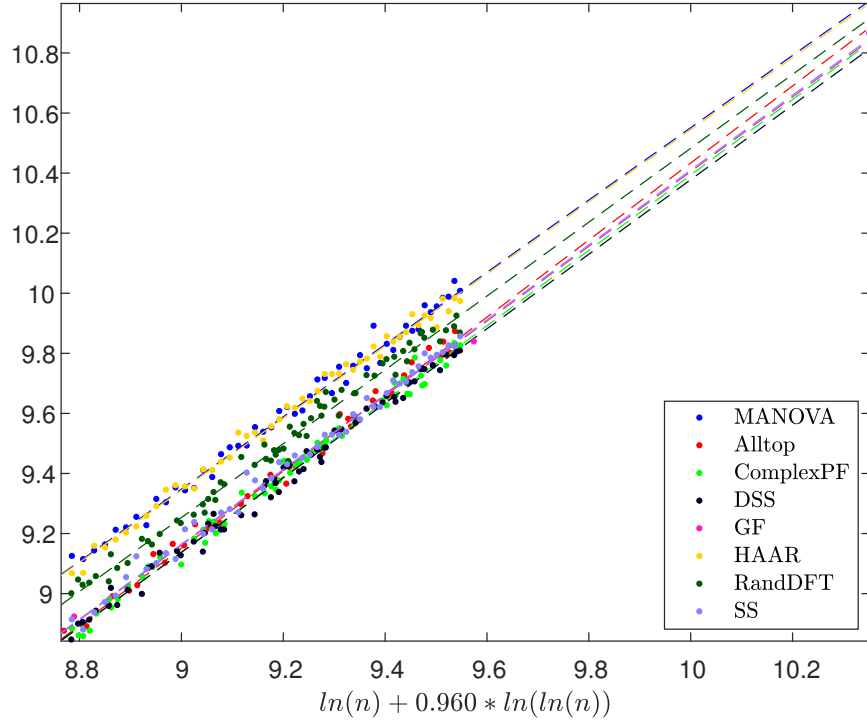

Figure 81: Test 2 for  $\Psi_{min}$ , complex frames  $\gamma = 0.5$  and  $\beta = 0.5$ . Plot shows  $-\ln \mathbb{E}_{K_n}(\Delta_{\Psi}(X_{K_n}^{(n)}; n, m_n, k_n)^2)$

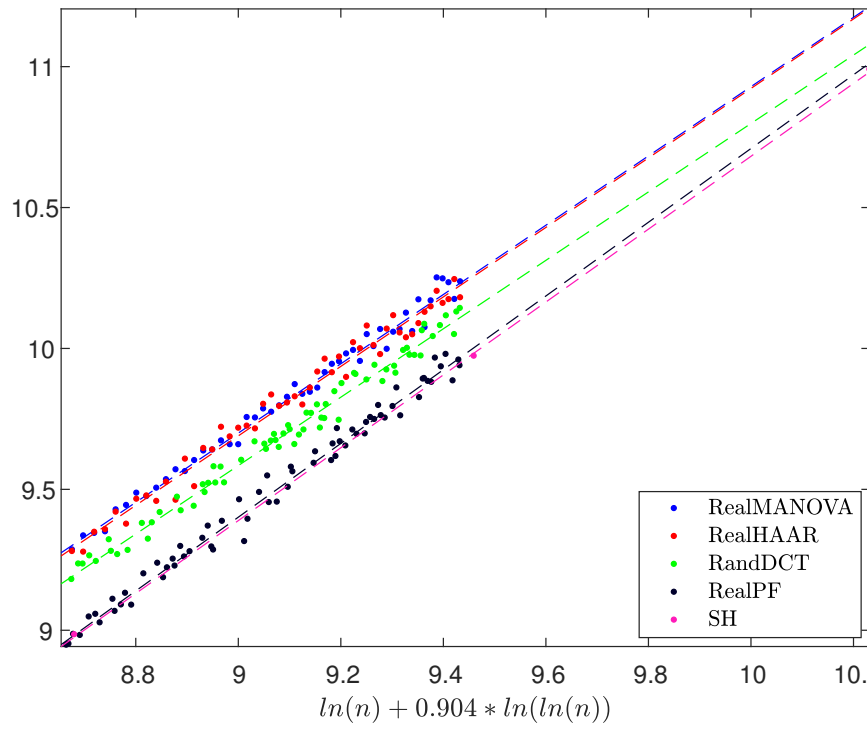

Figure 82: Test 2 for  $\Psi_{min}$ , real frames  $\gamma = 0.5$  and  $\beta = 0.5$ . Plot shows  $-\ln \mathbb{E}_{K_n}(\Delta_{\Psi}(X_{K_n}^{(n)}; n, m_n, k_n)^2)$



| Frame      | $R^2$   | $\hat{b}$ | $SE(\hat{b})$ | p-value<br>$b = b_{MANOVA}$ |
|------------|---------|-----------|---------------|-----------------------------|
| MANOVA     | 0.98988 | 1.20307   | 0.01755       | 1                           |
| DSS        | 0.99177 | 1.24084   | 0.01391       | 0.09447                     |
| GF         | 0.99874 | 1.24354   | 0.04421       | 0.39902                     |
| ComplexPF  | 0.99238 | 1.25535   | 0.01354       | 0.02008                     |
| Alltop     | 0.99228 | 1.28274   | 0.01912       | 0.00290                     |
| SS         | 0.99201 | 1.24593   | 0.01614       | 0.07550                     |
| HAAR       | 0.99241 | 1.20011   | 0.01515       | 0.89859                     |
| RandDFT    | 0.98884 | 1.22955   | 0.01608       | 0.26850                     |
| RealMANOVA | 0.98832 | 1.22924   | 0.01929       | 1                           |
| RealPF     | 0.98769 | 1.30824   | 0.01812       | 0.00348                     |
| SH         | 0.99988 | 1.29280   | 0.01425       | 0.01079                     |
| RealHAAR   | 0.97981 | 1.23286   | 0.02554       | 0.91014                     |
| RandDCT    | 0.98499 | 1.21397   | 0.01844       | 0.56838                     |

Table 47: Results of Test 2 for  $\Psi_{min}$ ,  $\gamma = 0.5$  and  $\beta = 0.5$

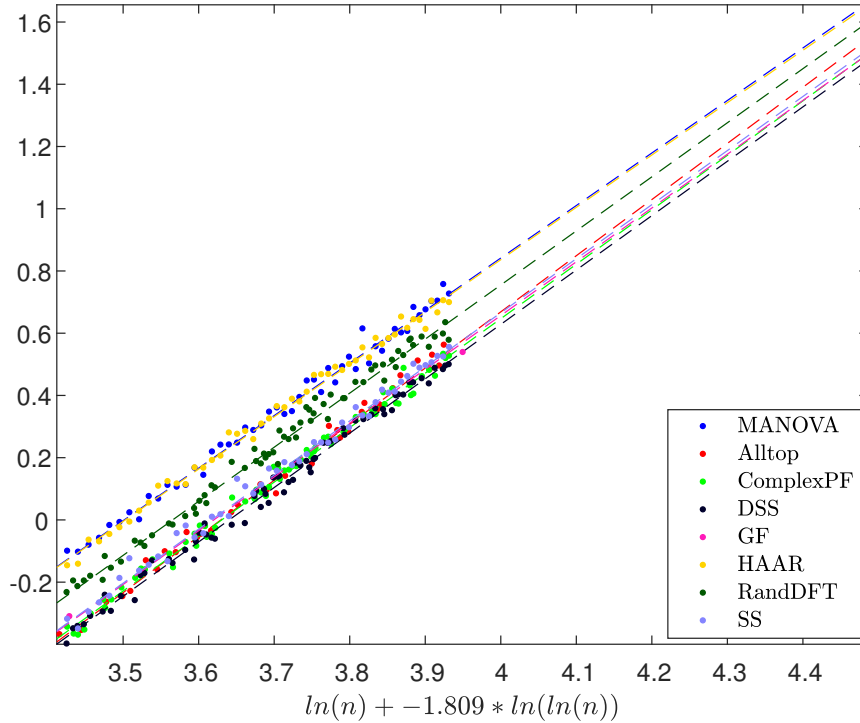

Figure 83: Test 2 for  $\Psi_{cond}$ , complex frames  $\gamma = 0.5$  and  $\beta = 0.5$ . Plot shows  $-\ln \mathbb{E}_{K_n}(\Delta_{\Psi}(X_{K_n}^{(n)}; n, m_n, k_n)^2)$

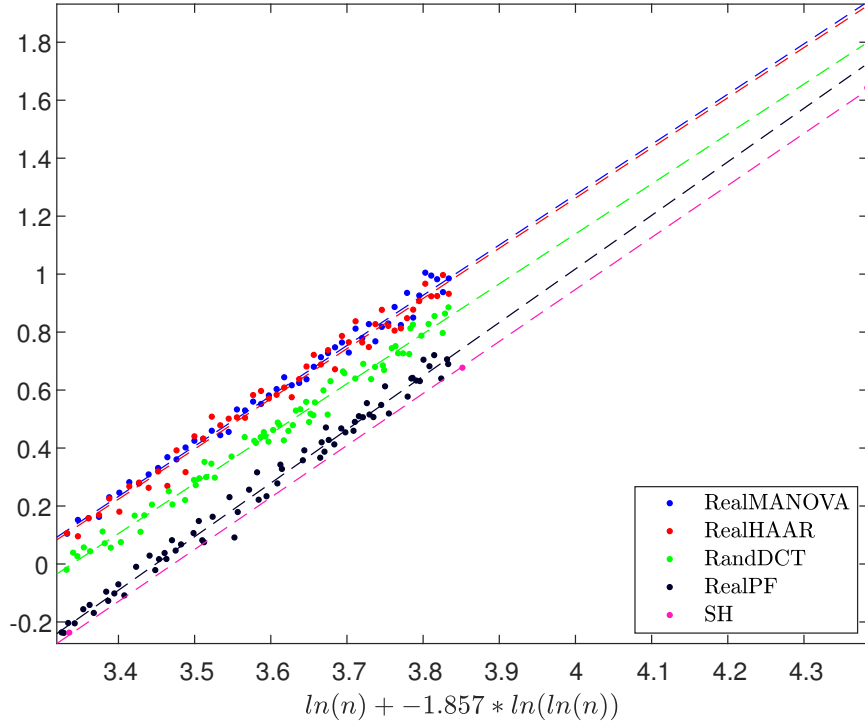

Figure 84: Test 2 for  $\Psi_{cond}$ , real frames  $\gamma = 0.5$  and  $\beta = 0.5$ . Plot shows  $-\ln \mathbb{E}_{K_n}(\Delta_{\Psi}(X_{K_n}^{(n)}; n, m_n, k_n)^2)$

| Frame      | $R^2$   | $\hat{b}$ | $SE(\hat{b})$ | p-value<br>$b = b_{MANOVA}$ |
|------------|---------|-----------|---------------|-----------------------------|
| MANOVA     | 0.99051 | 1.68782   | 0.02384       | 1                           |
| DSS        | 0.99173 | 1.74755   | 0.01965       | 0.05566                     |
| GF         | 0.99897 | 1.72825   | 0.05553       | 0.50661                     |
| ComplexPF  | 0.99200 | 1.75015   | 0.01935       | 0.04470                     |
| Alltop     | 0.99214 | 1.80445   | 0.02714       | 0.00179                     |
| SS         | 0.99187 | 1.73781   | 0.02270       | 0.13220                     |
| HAAR       | 0.99262 | 1.68219   | 0.02093       | 0.85951                     |
| RandDFT    | 0.98967 | 1.73777   | 0.02185       | 0.12525                     |
| RealMANOVA | 0.98979 | 1.73479   | 0.02544       | 1                           |
| RealPF     | 0.98846 | 1.84732   | 0.02476       | 0.00196                     |
| SH         | 0.99995 | 1.79389   | 0.01320       | 0.04450                     |
| RealHAAR   | 0.98053 | 1.73126   | 0.03521       | 0.93544                     |
| RandDCT    | 0.98586 | 1.72284   | 0.02540       | 0.74025                     |

Table 48: Results of Test 2 for  $\Psi_{cond}$ ,  $\gamma = 0.5$  and  $\beta = 0.5$

| Frame      | $R^2$   | $\hat{b}$ | $SE(\hat{b})$ | p-value<br>$b = b_{MANOVA}$ |
|------------|---------|-----------|---------------|-----------------------------|
| MANOVA     | 0.99874 | 0.95877   | 0.00492       | 1                           |
| DSS        | 0.99955 | 0.90196   | 0.01910       | 0.00589                     |
| Alltop     | 0.99718 | 0.90835   | 0.01080       | 6.7123e-05                  |
| HAAR       | 0.99768 | 0.96836   | 0.00674       | 0.25358                     |
| RandDFT    | 0.99617 | 0.92578   | 0.00829       | 9.1113e-04                  |
| RealMANOVA | 0.99876 | 0.96657   | 0.00491       | 1                           |
| RealHAAR   | 0.99718 | 0.96245   | 0.00739       | 0.64367                     |
| RandDCT    | 0.99753 | 0.96236   | 0.00590       | 0.58418                     |

Table 49: Results of Test 1 for  $\gamma = 0.25$  and  $\beta = 0.8$ .

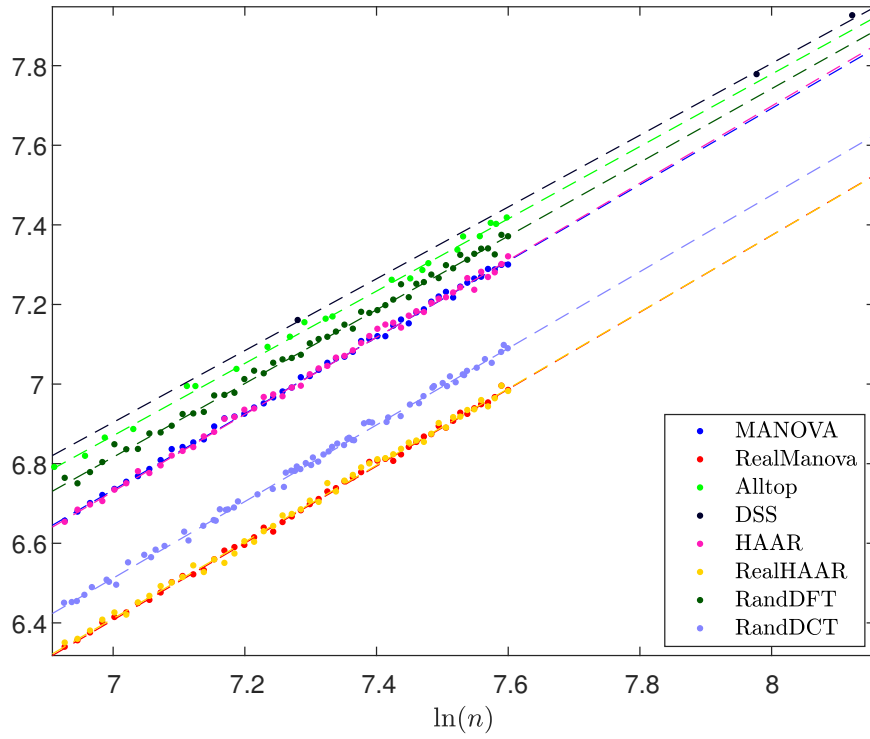

Figure 85: Test 1 for  $\gamma = 0.25$  and  $\beta = 0.8$ . Plot shows  $-\frac{1}{2} \ln \text{Var}_{K_n}(\Delta_{KS}(X_{K_n}^{(n)}; n, m_n, k_n))$  over  $\ln(n)$ .

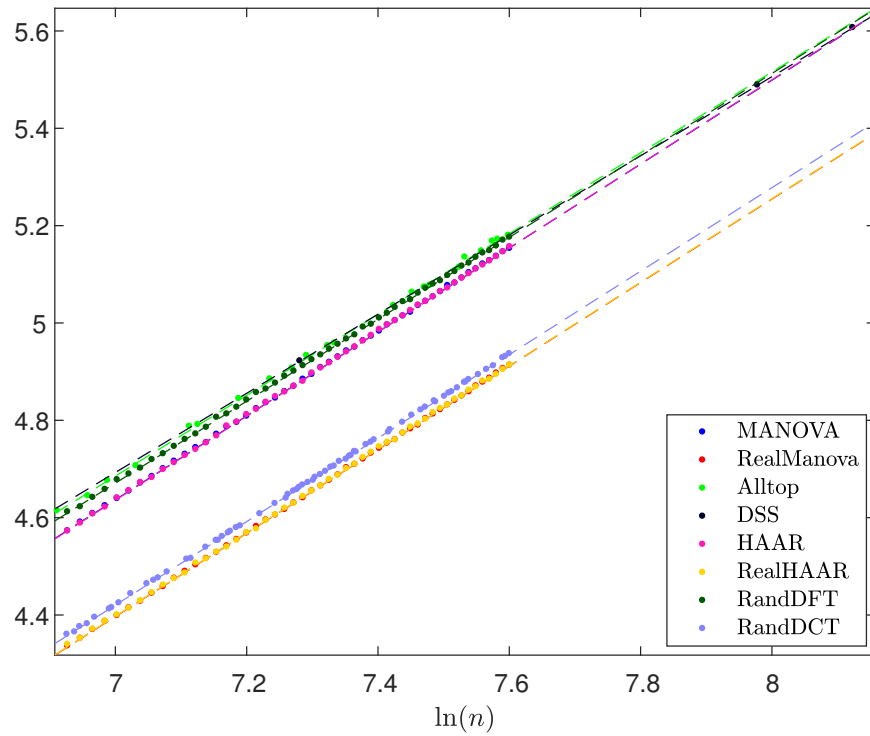

Figure 86: Test 1 for  $\gamma = 0.25$  and  $\beta = 0.8$ . Plot shows  $-\frac{1}{2} \ln \mathbb{E}_{K_n}(\Delta_{KS}(X_{K_n}^{(n)}; n, m_n, k_n)^2)$  over  $\ln(n)$ .

| Frame      | $R^2$   | $\hat{b}$ | $SE(\hat{b})$ | p-value<br>$b = b_{MANOVA}$ |
|------------|---------|-----------|---------------|-----------------------------|
| MANOVA     | 0.99994 | 0.86216   | 0.00095       | 1                           |
| DSS        | 1.00000 | 0.81326   | 0.00007       | 2.2697e-44                  |
| Alltop     | 0.99942 | 0.83030   | 0.00448       | 1.6634e-09                  |
| HAAR       | 0.99991 | 0.86372   | 0.00121       | 0.31297                     |
| RandDFT    | 0.99986 | 0.84177   | 0.00144       | 2.0468e-20                  |
| RealMANOVA | 0.99994 | 0.85799   | 0.00097       | 1                           |
| RealHAAR   | 0.99986 | 0.85811   | 0.00149       | 0.94493                     |
| RandDCT    | 0.99991 | 0.85771   | 0.00100       | 0.83880                     |

Table 50: Results of Test 1 (MSE) for  $\gamma = 0.25$  and  $\beta = 0.8$ .

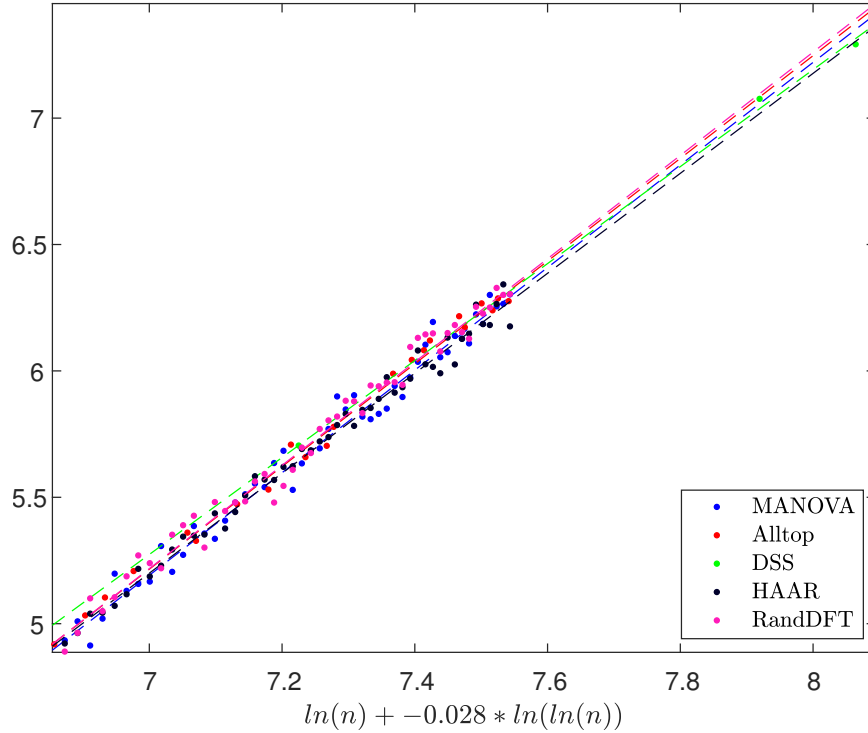

Figure 87: Test 2 for  $\Psi_{AC}$ , complex frames  $\gamma = 0.25$  and  $\beta = 0.8$ . Plot shows  $-\ln \mathbb{E}_{K_n}(\Delta_{\Psi}(X_{K_n}^{(n)}; n, m_n, k_n)^2)$

| Frame      | $R^2$   | $\hat{b}$ | $SE(\hat{b})$ | p-value<br>$b = b_{MANOVA}$ |
|------------|---------|-----------|---------------|-----------------------------|
| MANOVA     | 0.98158 | 2.02891   | 0.04011       | 1                           |
| DSS        | 0.99868 | 1.91793   | 0.06979       | 0.17423                     |
| Alltop     | 0.99426 | 2.03145   | 0.03451       | 0.96187                     |
| HAAR       | 0.98969 | 1.97723   | 0.02913       | 0.29977                     |
| RandDFT    | 0.98504 | 2.04319   | 0.03635       | 0.79246                     |
| RealMANOVA | 0.98708 | 1.11400   | 0.01840       | 1                           |
| RealHAAR   | 0.98754 | 1.10152   | 0.01786       | 0.62771                     |
| RandDCT    | 0.98710 | 1.10769   | 0.01559       | 0.79411                     |

Table 51: Results of Test 2 for  $\Psi_{AC}$ ,  $\gamma = 0.25$  and  $\beta = 0.8$

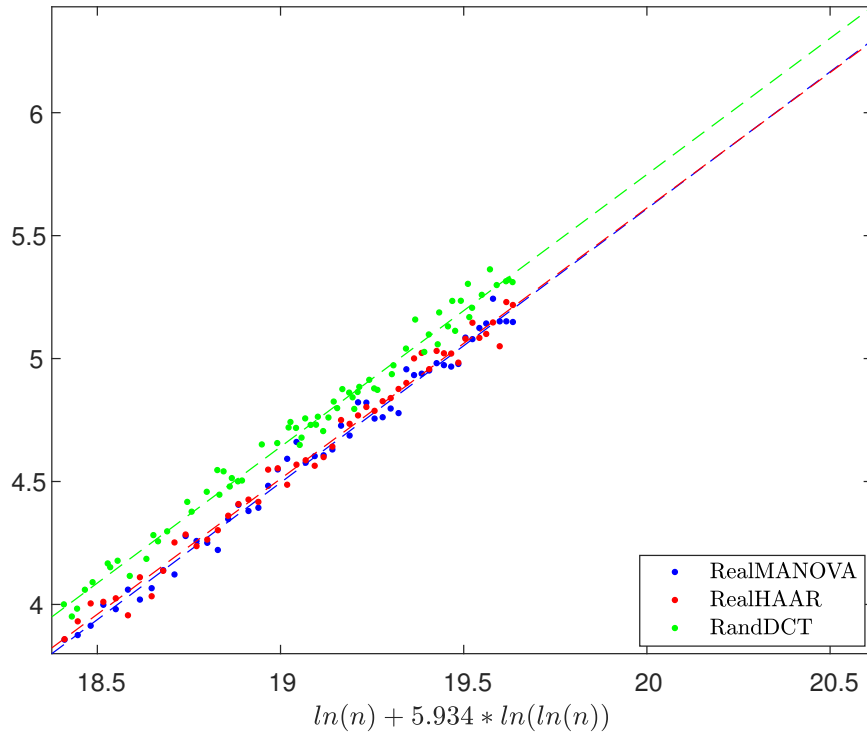

Figure 88: Test 2 for  $\Psi_{AC}$ , real frames  $\gamma = 0.25$  and  $\beta = 0.8$ . Plot shows  $-\ln \mathbb{E}_{K_n}(\Delta_{\Psi}(X_{K_n}^{(n)}; n, m_n, k_n)^2)$

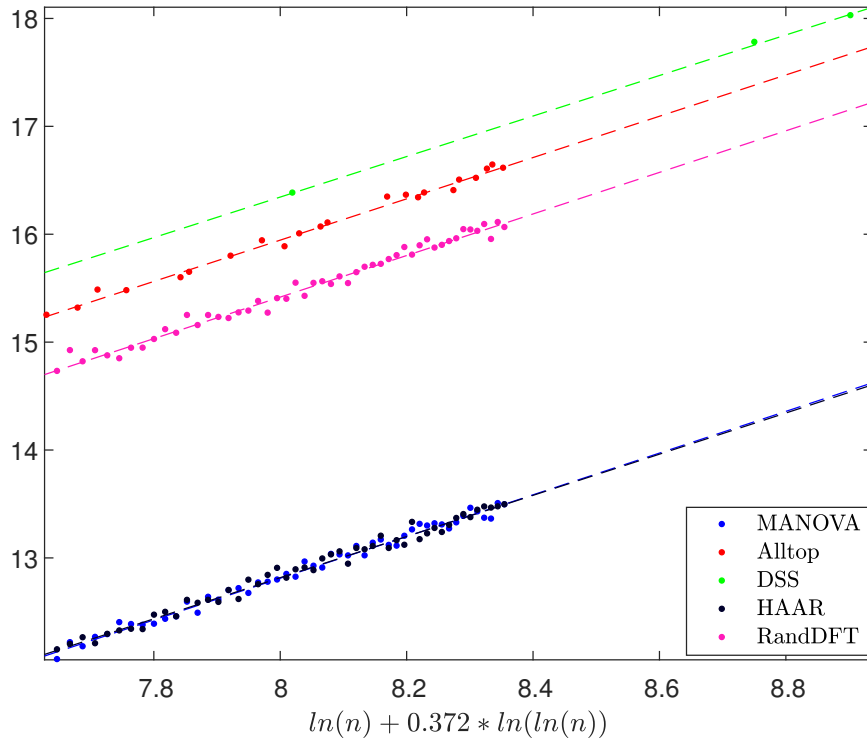

Figure 89: Test 2 for  $\Psi_{Shannon}$ , complex frames  $\gamma = 0.25$  and  $\beta = 0.8$ . Plot shows  $-\ln \mathbb{E}_{K_n}(\Delta_{\Psi}(X_{K_n}^{(n)}; n, m_n, k_n)^2)$

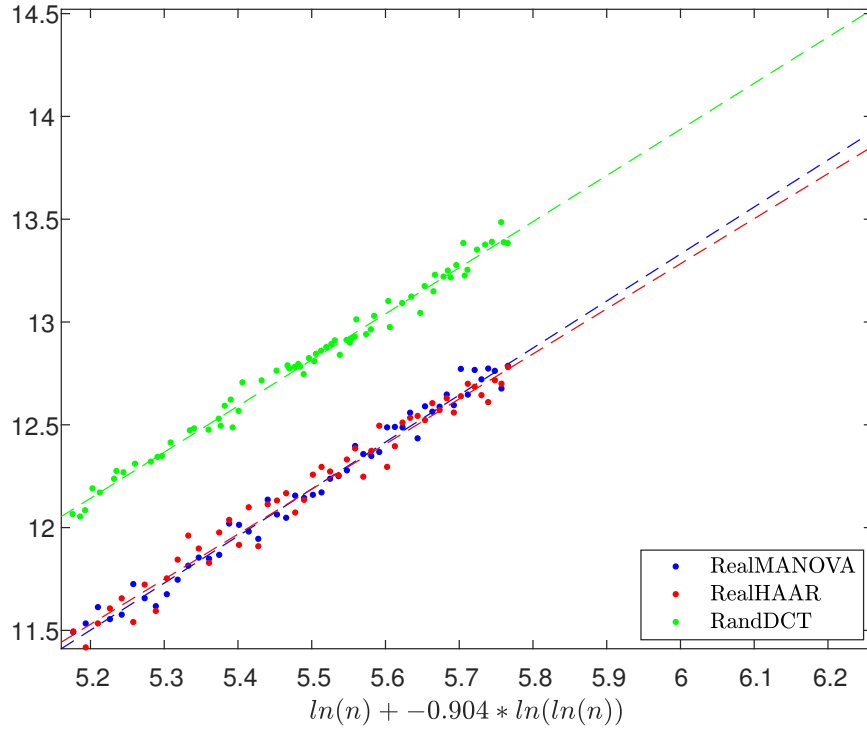

Figure 90: Test 2 for  $\Psi_{Shannon}$ , real frames  $\gamma = 0.25$  and  $\beta = 0.8$ . Plot shows  $-\ln \mathbb{E}_{K_n}(\Delta_{\Psi}(X_{K_n}^{(n)}; n, m_n, k_n)^2)$

| Frame      | $R^2$   | $\hat{b}$ | $SE(\hat{b})$ | p-value<br>$b = b_{MANOVA}$ |
|------------|---------|-----------|---------------|-----------------------------|
| MANOVA     | 0.98788 | 1.93331   | 0.03091       | 1                           |
| DSS        | 0.99952 | 1.87770   | 0.04097       | 0.28385                     |
| Alltop     | 0.99156 | 1.91367   | 0.03948       | 0.69644                     |
| HAAR       | 0.98603 | 1.90768   | 0.03278       | 0.57068                     |
| RandDFT    | 0.98354 | 1.92636   | 0.03597       | 0.88379                     |
| RealMANOVA | 0.98368 | 2.28690   | 0.04251       | 1                           |
| RealHAAR   | 0.97130 | 2.19227   | 0.05439       | 0.17362                     |
| RandDCT    | 0.98792 | 2.24315   | 0.03053       | 0.40492                     |

Table 52: Results of Test 2 for  $\Psi_{Shannon}$ ,  $\gamma = 0.25$  and  $\beta = 0.8$

| Frame      | $R^2$   | $\hat{b}$ | $SE(\hat{b})$ | p-value<br>$b = b_{MANOVA}$ |
|------------|---------|-----------|---------------|-----------------------------|
| MANOVA     | 0.99020 | 1.30582   | 0.01876       | 1                           |
| DSS        | 0.99999 | 1.31908   | 0.00374       | 0.49120                     |
| Alltop     | 0.99753 | 1.34522   | 0.01497       | 0.10524                     |
| HAAR       | 0.98990 | 1.24633   | 0.01817       | 0.02494                     |
| RandDFT    | 0.99176 | 1.29581   | 0.01705       | 0.69378                     |
| RealMANOVA | 0.98625 | 1.53609   | 0.02618       | 1                           |
| RealHAAR   | 0.97894 | 1.49241   | 0.03160       | 0.28979                     |
| RandDCT    | 0.99024 | 1.63612   | 0.01999       | 0.00296                     |

Table 53: Results of Test 2 for  $\Psi_{RIP}$ ,  $\gamma = 0.25$  and  $\beta = 0.8$

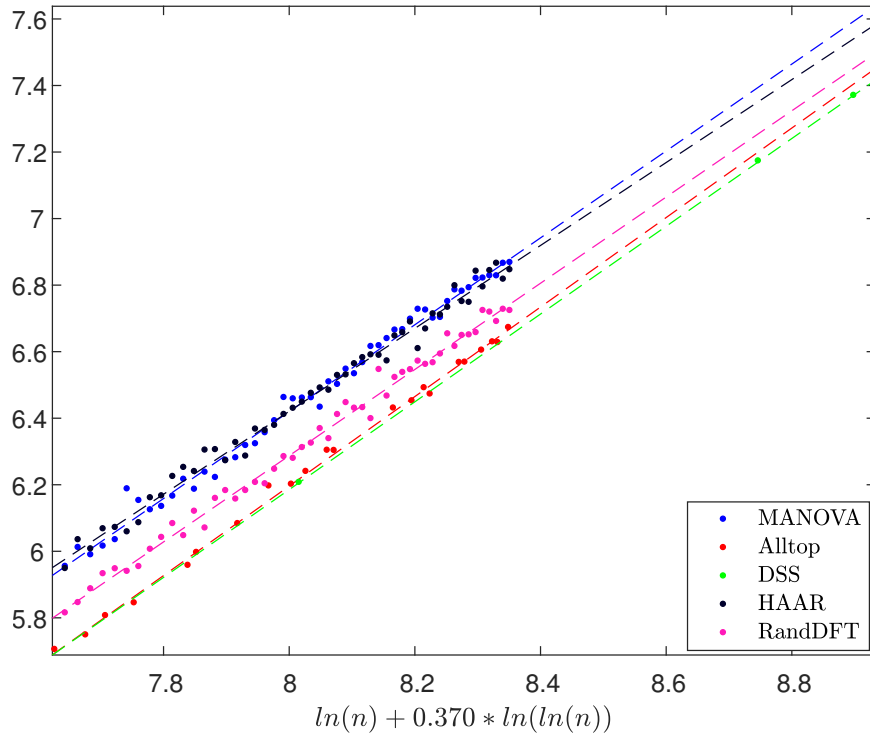

Figure 91: Test 2 for  $\Psi_{RIP}$ , complex frames  $\gamma = 0.25$  and  $\beta = 0.8$ . Plot shows  $-\ln \mathbb{E}_{K_n}(\Delta_{\Psi}(X_{K_n}^{(n)}; n, m_n, k_n)^2)$

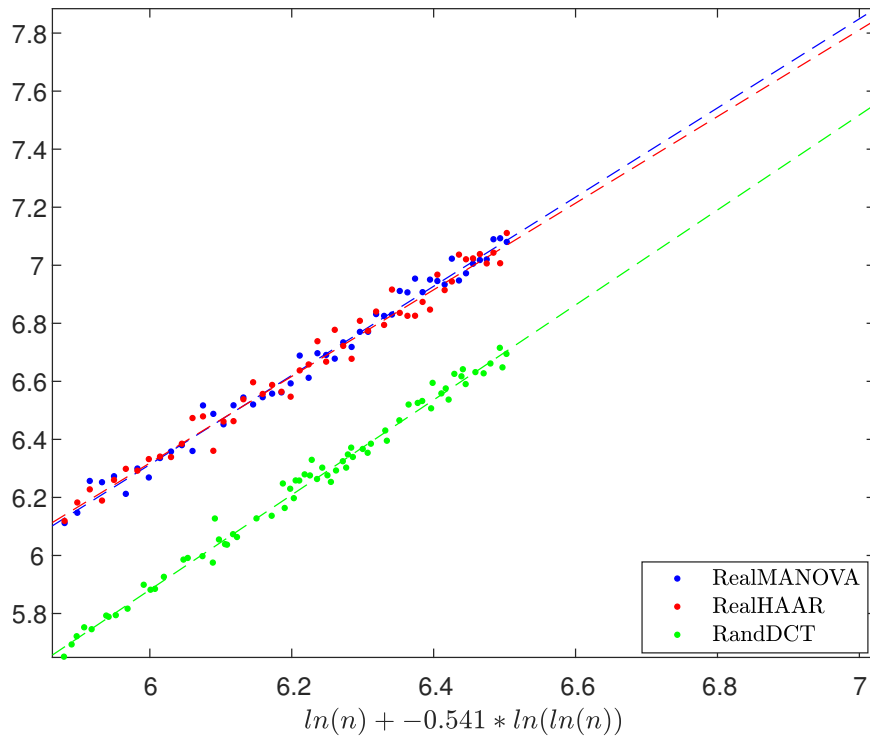

Figure 92: Test 2 for  $\Psi_{RIP}$ , real frames  $\gamma = 0.25$  and  $\beta = 0.8$ . Plot shows  $-\ln \mathbb{E}_{K_n}(\Delta_{\Psi}(X_{K_n}^{(n)}; n, m_n, k_n)^2)$

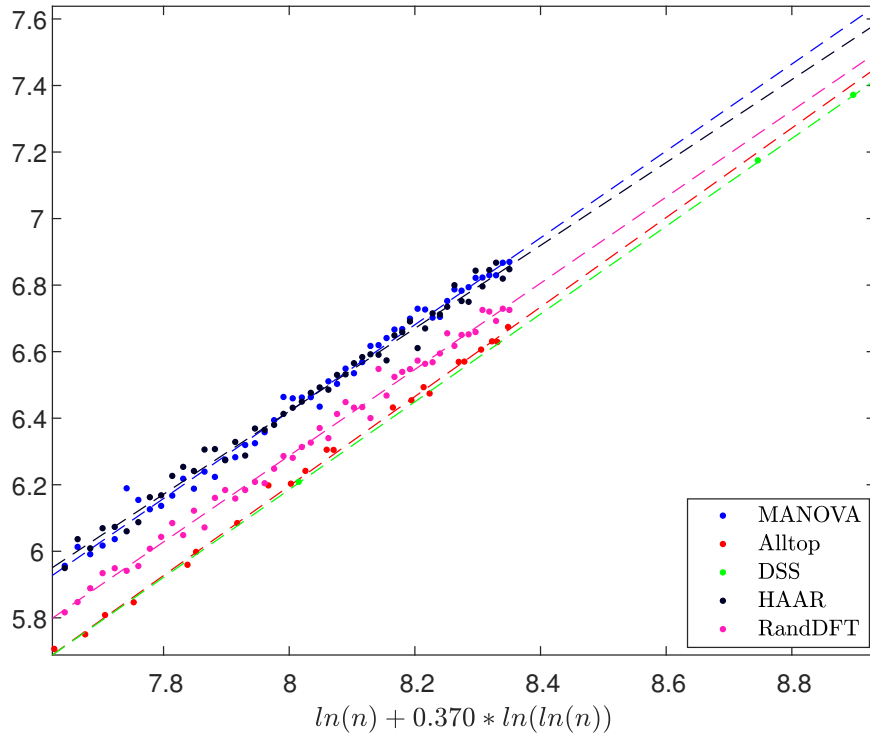

Figure 93: Test 2 for  $\Psi_{max}$ , complex frames  $\gamma = 0.25$  and  $\beta = 0.8$ . Plot shows  $-\ln \mathbb{E}_{K_n}(\Delta_{\Psi}(X_{K_n}^{(n)}; n, m_n, k_n)^2)$

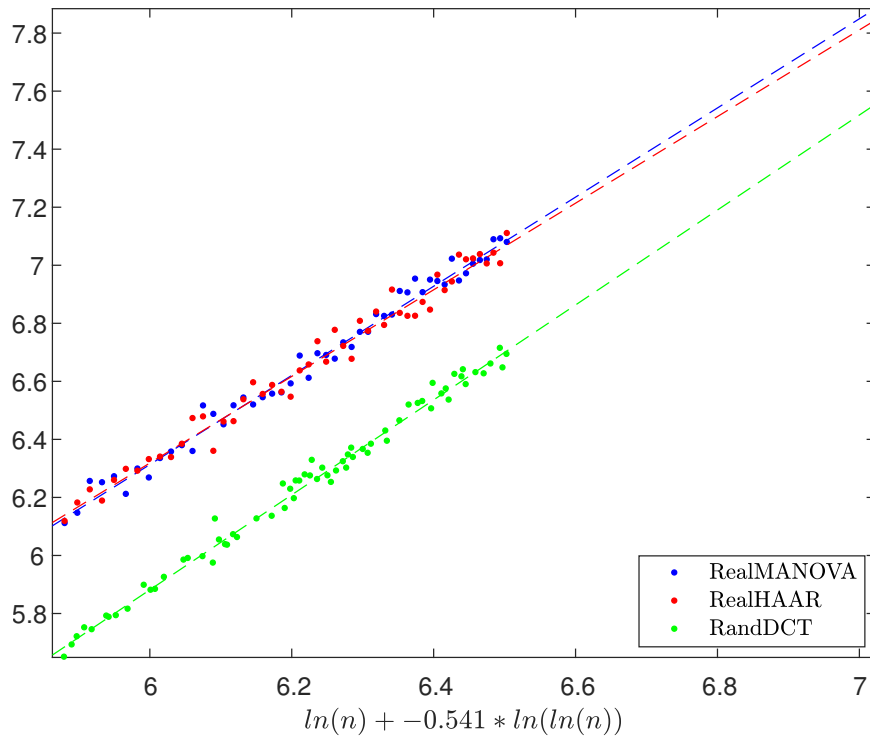

Figure 94: Test 2 for  $\Psi_{max}$ , real frames  $\gamma = 0.25$  and  $\beta = 0.8$ . Plot shows  $-\ln \mathbb{E}_{K_n}(\Delta_{\Psi}(X_{K_n}^{(n)}; n, m_n, k_n)^2)$



| Frame      | $R^2$   | $\hat{b}$ | $SE(\hat{b})$ | p-value<br>$b = b_{MANOVA}$ |
|------------|---------|-----------|---------------|-----------------------------|
| MANOVA     | 0.99020 | 1.30582   | 0.01876       | 1                           |
| DSS        | 0.99999 | 1.31908   | 0.00374       | 0.49120                     |
| Alltop     | 0.99753 | 1.34522   | 0.01497       | 0.10524                     |
| HAAR       | 0.98990 | 1.24633   | 0.01817       | 0.02494                     |
| RandDFT    | 0.99176 | 1.29581   | 0.01705       | 0.69378                     |
| RealMANOVA | 0.98625 | 1.53609   | 0.02618       | 1                           |
| RealHAAR   | 0.97894 | 1.49241   | 0.03160       | 0.28979                     |
| RandDCT    | 0.99024 | 1.63612   | 0.01999       | 0.00296                     |

Table 54: Results of Test 2 for  $\Psi_{max}$ ,  $\gamma = 0.25$  and  $\beta = 0.8$

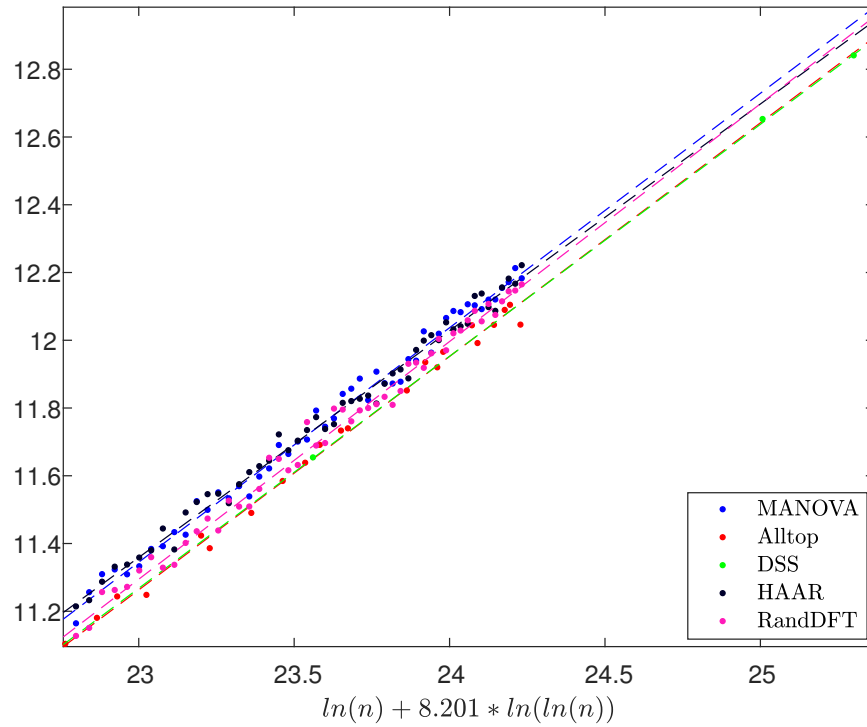

Figure 95: Test 2 for  $\Psi_{min}$ , complex frames  $\gamma = 0.25$  and  $\beta = 0.8$ . Plot shows  $-\ln \mathbb{E}_{K_n}(\Delta_{\Psi}(X_{K_n}^{(n)}; n, m_n, k_n)^2)$

| Frame      | $R^2$   | $\hat{b}$ | $SE(\hat{b})$ | p-value<br>$b = b_{MANOVA}$ |
|------------|---------|-----------|---------------|-----------------------------|
| MANOVA     | 0.99069 | 0.69211   | 0.00968       | 1                           |
| DSS        | 0.99989 | 0.68481   | 0.00707       | 0.54549                     |
| Alltop     | 0.99361 | 0.68938   | 0.01236       | 0.86252                     |
| HAAR       | 0.99118 | 0.66928   | 0.00911       | 0.08921                     |
| RandDFT    | 0.99015 | 0.70167   | 0.01010       | 0.49586                     |
| RealMANOVA | 0.98338 | 0.50871   | 0.00955       | 1                           |
| RealHAAR   | 0.98410 | 0.51233   | 0.00940       | 0.78729                     |
| RandDCT    | 0.97513 | 0.52982   | 0.01042       | 0.13787                     |

Table 55: Results of Test 2 for  $\Psi_{min}$ ,  $\gamma = 0.25$  and  $\beta = 0.8$

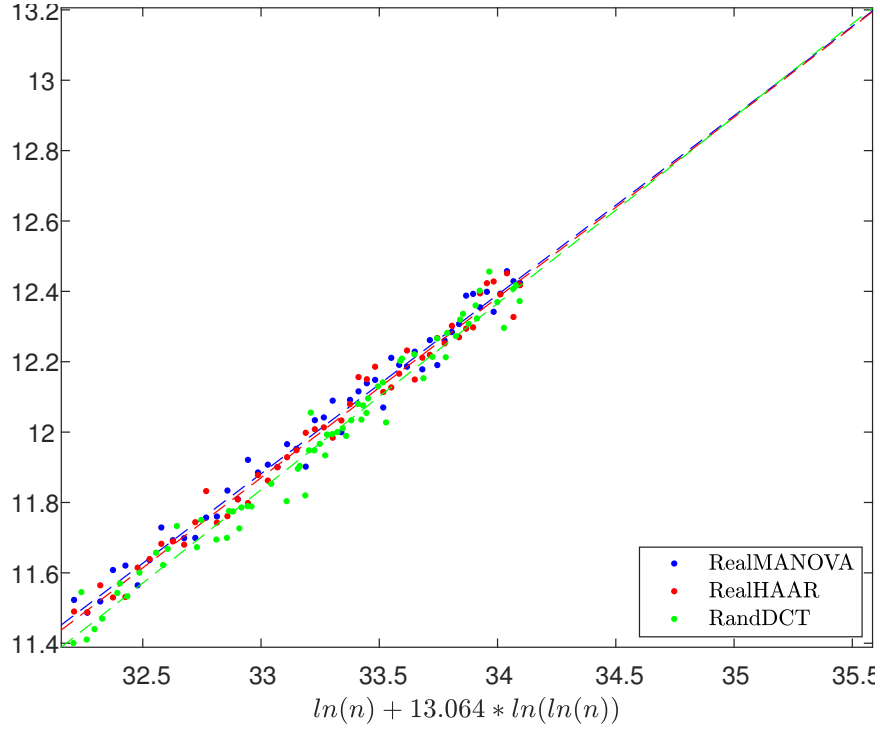

Figure 96: Test 2 for  $\Psi_{min}$ , real frames  $\gamma = 0.25$  and  $\beta = 0.8$ . Plot shows  $-\ln \mathbb{E}_{K_n}(\Delta_{\Psi}(X_{K_n}^{(n)}; n, m_n, k_n)^2)$

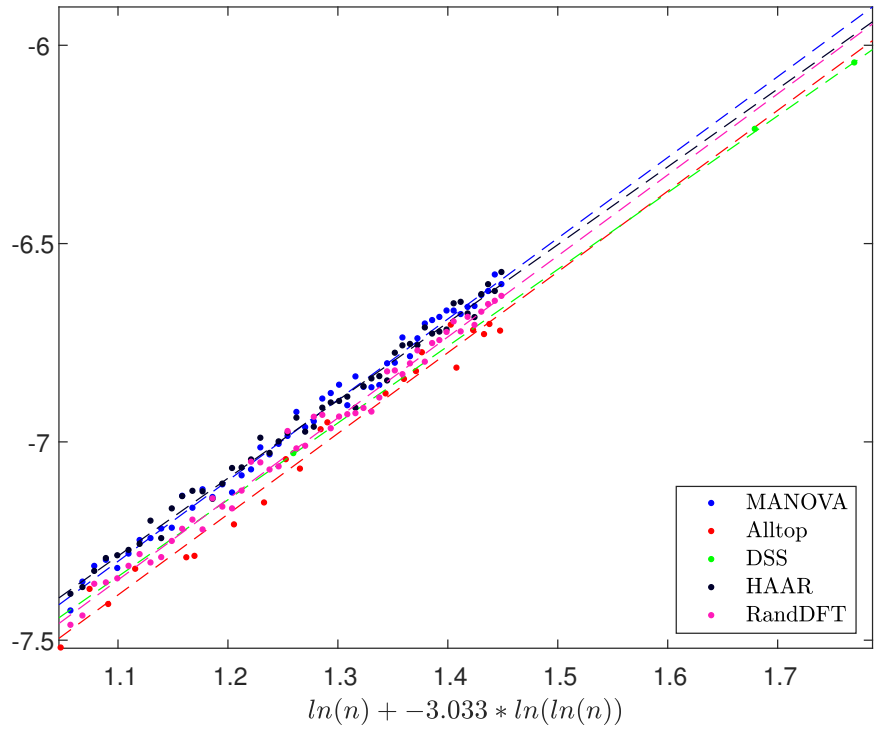

Figure 97: Test 2 for  $\Psi_{cond}$ , complex frames  $\gamma = 0.25$  and  $\beta = 0.8$ . Plot shows  $-\ln \mathbb{E}_{K_n}(\Delta_{\Psi}(X_{K_n}^{(n)}; n, m_n, k_n)^2)$

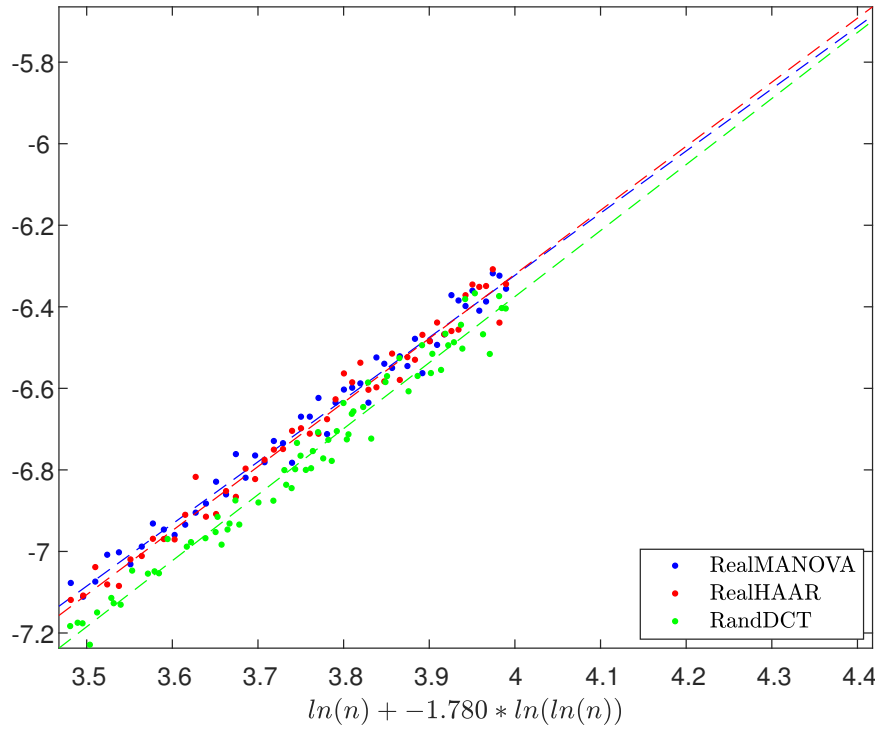

Figure 98: Test 2 for  $\Psi_{cond}$ , real frames  $\gamma = 0.25$  and  $\beta = 0.8$ . Plot shows  $-\ln \mathbb{E}_{K_n}(\Delta_{\Psi}(X_{K_n}^{(n)}; n, m_n, k_n)^2)$

| Frame      | $R^2$   | $\hat{b}$ | $SE(\hat{b})$ | p-value<br>$b = b_{MANOVA}$ |
|------------|---------|-----------|---------------|-----------------------------|
| MANOVA     | 0.99091 | 2.03679   | 0.02815       | 1                           |
| DSS        | 0.99994 | 1.93609   | 0.01469       | 0.00262                     |
| Alltop     | 0.98003 | 2.03648   | 0.06500       | 0.99658                     |
| HAAR       | 0.99124 | 1.96294   | 0.02663       | 0.05971                     |
| RandDFT    | 0.99059 | 2.04277   | 0.02873       | 0.88199                     |
| RealMANOVA | 0.98096 | 1.52444   | 0.03066       | 1                           |
| RealHAAR   | 0.97965 | 1.57117   | 0.03269       | 0.29973                     |
| RandDCT    | 0.97458 | 1.61929   | 0.03219       | 0.03502                     |

Table 56: Results of Test 2 for  $\Psi_{cond}$ ,  $\gamma = 0.25$  and  $\beta = 0.8$

| Frame      | $R^2$   | $\hat{b}$ | $SE(\hat{b})$ | p-value<br>$b = b_{MANOVA}$ |
|------------|---------|-----------|---------------|-----------------------------|
| MANOVA     | 0.99856 | 0.96986   | 0.00532       | 1                           |
| DSS        | 0.99946 | 0.90177   | 0.02101       | 0.00285                     |
| Alltop     | 0.99859 | 0.93852   | 0.00788       | 0.00155                     |
| HAAR       | 0.99683 | 0.96243   | 0.00784       | 0.43495                     |
| RandDFT    | 0.99416 | 0.94482   | 0.01045       | 0.03528                     |
| RealMANOVA | 0.99820 | 0.97742   | 0.00599       | 1                           |
| RealHAAR   | 0.99756 | 0.96389   | 0.00688       | 0.14130                     |
| RandDCT    | 0.99772 | 0.96618   | 0.00568       | 0.17634                     |

Table 57: Results of Test 1 for  $\gamma = 0.25$  and  $\beta = 0.6$ .

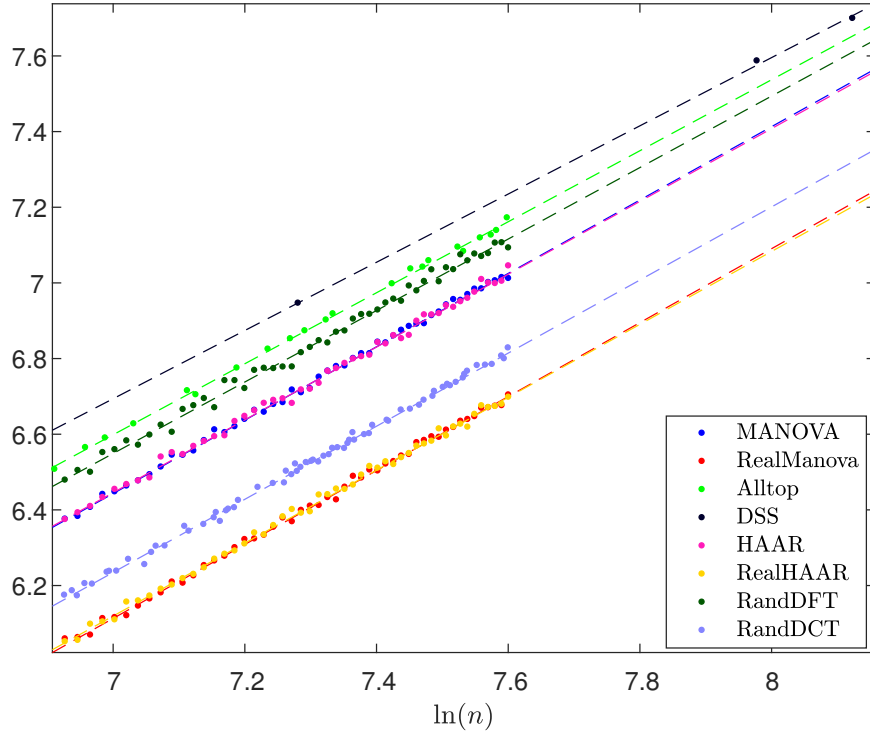

Figure 99: Test 1 for  $\gamma = 0.25$  and  $\beta = 0.6$ . Plot shows  $-\frac{1}{2} \ln \text{Var}_{K_n}(\Delta_{KS}(X_{K_n}^{(n)}; n, m_n, k_n))$  over  $\ln(n)$ .

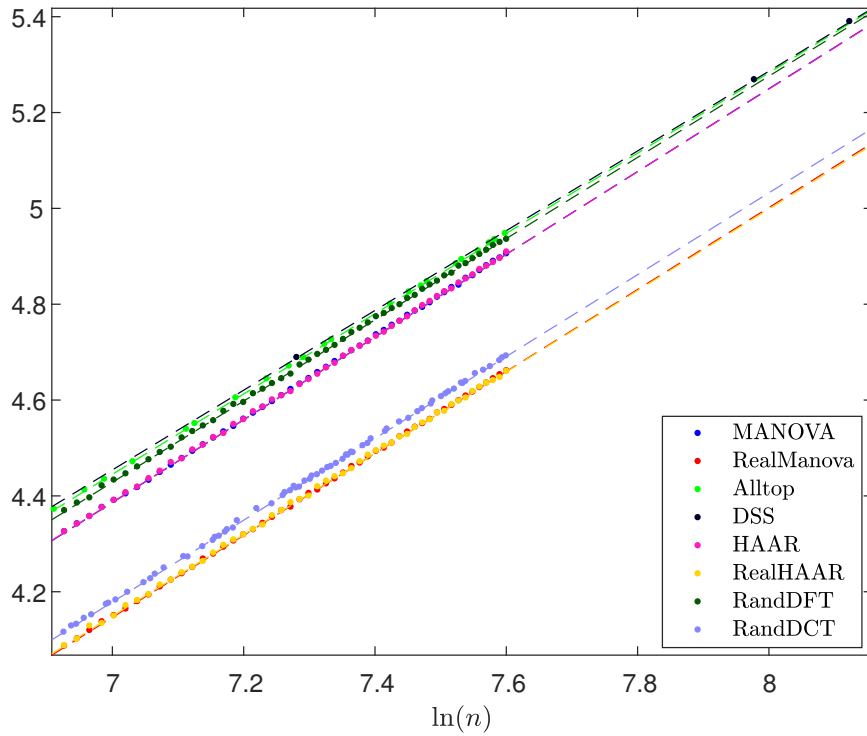

Figure 100: Test 1 for  $\gamma = 0.25$  and  $\beta = 0.6$ . Plot shows  $-\frac{1}{2} \ln \mathbb{E}_{K_n}(\Delta_{KS}(X_{K_n}^{(n)}; n, m_n, k_n)^2)$  over  $\ln(n)$ .

| Frame      | $R^2$   | $\hat{b}$ | $SE(\hat{b})$ | p-value<br>$b = b_{MANOVA}$ |
|------------|---------|-----------|---------------|-----------------------------|
| MANOVA     | 0.99995 | 0.86361   | 0.00088       | 1                           |
| DSS        | 1.00000 | 0.83218   | 0.00055       | 2.1430e-33                  |
| Alltop     | 0.99997 | 0.83782   | 0.00107       | 1.9002e-28                  |
| HAAR       | 0.99986 | 0.86226   | 0.00148       | 0.43162                     |
| RandDFT    | 0.99981 | 0.84749   | 0.00167       | 1.8150e-13                  |
| RealMANOVA | 0.99993 | 0.85513   | 0.00103       | 1                           |
| RealHAAR   | 0.99971 | 0.84973   | 0.00209       | 0.02256                     |
| RandDCT    | 0.99980 | 0.85404   | 0.00149       | 0.54873                     |

Table 58: Results of Test 1 (MSE) for  $\gamma = 0.25$  and  $\beta = 0.6$ .

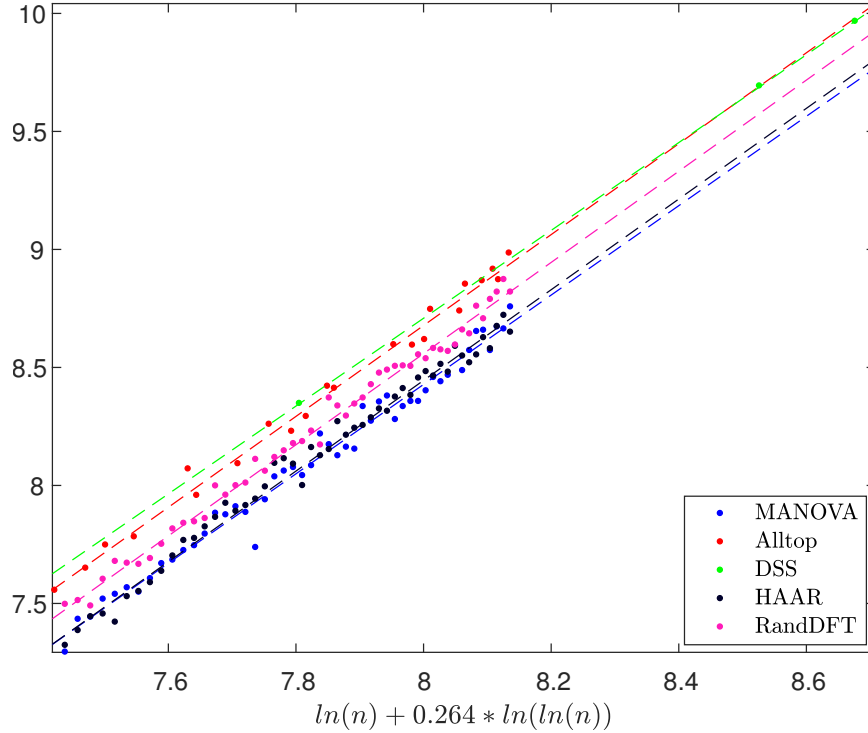

Figure 101: Test 2 for  $\Psi_{AC}$ , complex frames  $\gamma = 0.25$  and  $\beta = 0.6$ . Plot shows  $-\ln \mathbb{E}_{K_n}(\Delta_{\Psi}(X_{K_n}^{(n)}; n, m_n, k_n)^2)$

| Frame      | $R^2$   | $\hat{b}$ | $SE(\hat{b})$ | p-value<br>$b = b_{MANOVA}$ |
|------------|---------|-----------|---------------|-----------------------------|
| MANOVA     | 0.98243 | 1.89351   | 0.03655       | 1                           |
| DSS        | 0.99999 | 1.86080   | 0.00561       | 0.38065                     |
| Alltop     | 0.99071 | 1.92582   | 0.04170       | 0.56201                     |
| HAAR       | 0.98878 | 1.92117   | 0.02954       | 0.55743                     |
| RandDFT    | 0.99112 | 1.93144   | 0.02639       | 0.40216                     |
| RealMANOVA | 0.99088 | 1.53352   | 0.02123       | 1                           |
| RealHAAR   | 0.97957 | 1.46262   | 0.03049       | 0.05935                     |
| RandDCT    | 0.97619 | 1.47286   | 0.02831       | 0.08926                     |

Table 59: Results of Test 2 for  $\Psi_{AC}$ ,  $\gamma = 0.25$  and  $\beta = 0.6$

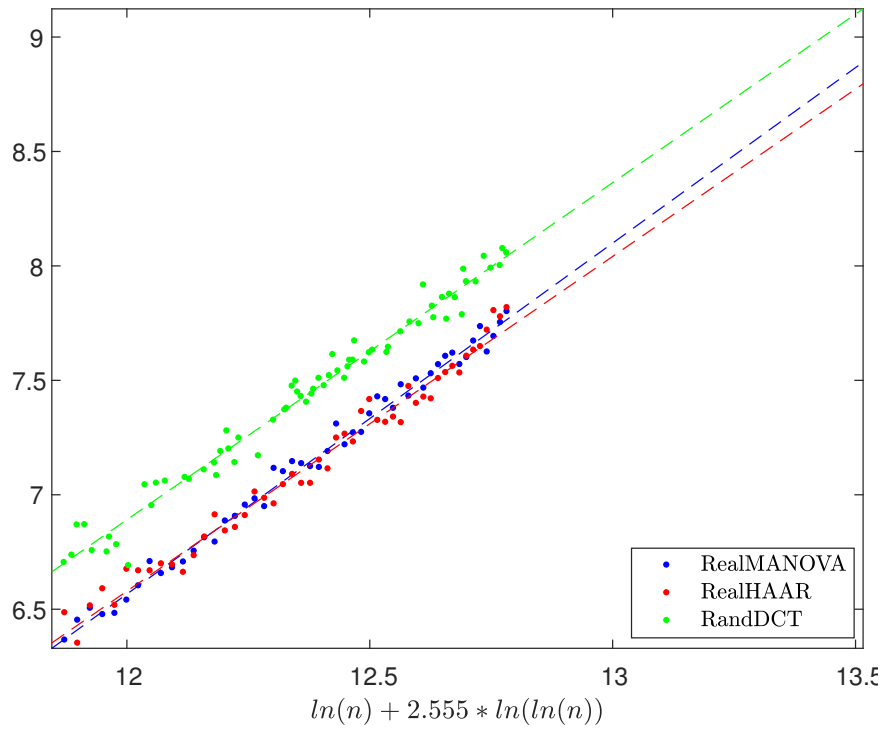

Figure 102: Test 2 for  $\Psi_{AC}$ , real frames  $\gamma = 0.25$  and  $\beta = 0.6$ . Plot shows  $-\ln \mathbb{E}_{K_n}(\Delta_{\Psi}(X_{K_n}^{(n)}; n, m_n, k_n)^2)$

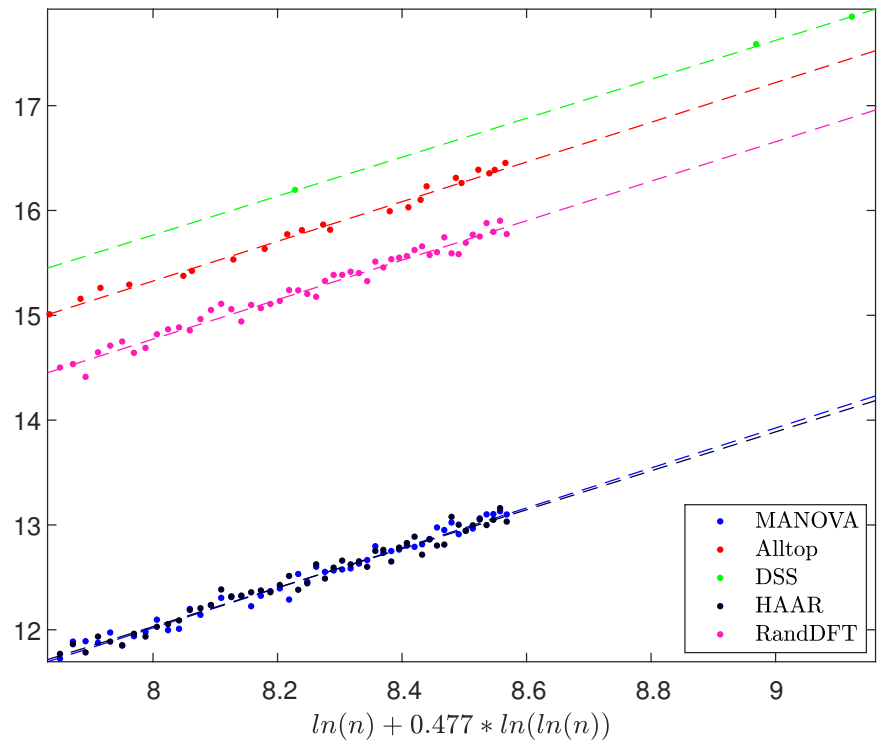

Figure 103: Test 2 for  $\Psi_{Shannon}$ , complex frames  $\gamma = 0.25$  and  $\beta = 0.6$ . Plot shows  $-\ln \mathbb{E}_{K_n}(\Delta_{\Psi}(X_{K_n}^{(n)}; n, m_n, k_n)^2)$

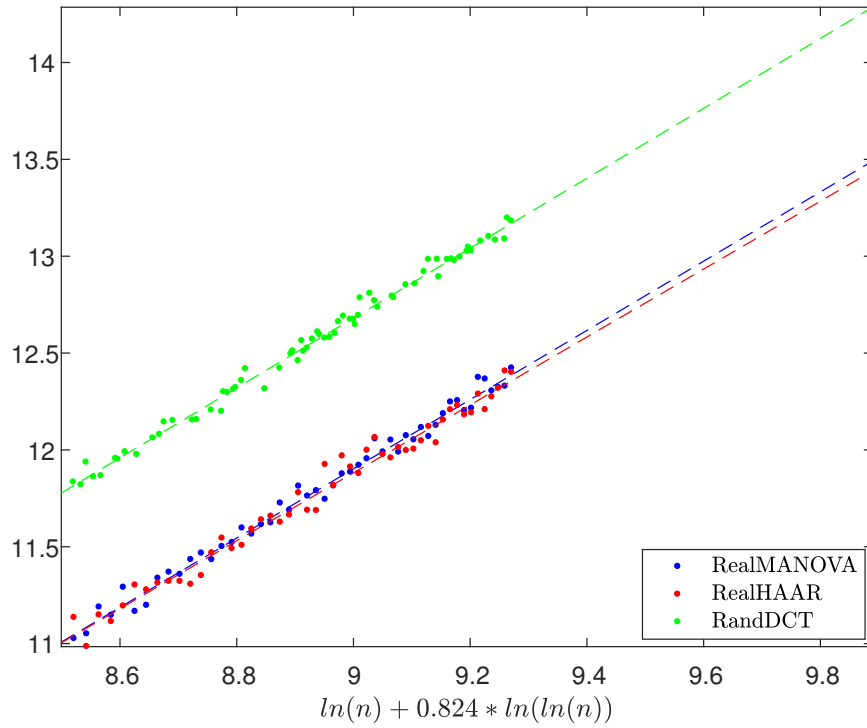

Figure 104: Test 2 for  $\Psi_{Shannon}$ , real frames  $\gamma = 0.25$  and  $\beta = 0.6$ . Plot shows  $-\ln \mathbb{E}_{K_n}(\Delta_{\Psi}(X_{K_n}^{(n)}; n, m_n, k_n)^2)$

| Frame      | $R^2$   | $\hat{b}$ | $SE(\hat{b})$ | p-value<br>$b = b_{MANOVA}$ |
|------------|---------|-----------|---------------|-----------------------------|
| MANOVA     | 0.98123 | 1.90661   | 0.03806       | 1                           |
| DSS        | 0.99982 | 1.85725   | 0.02489       | 0.28313                     |
| Alltop     | 0.98847 | 1.89320   | 0.04572       | 0.82235                     |
| HAAR       | 0.97592 | 1.85769   | 0.04212       | 0.39097                     |
| RandDFT    | 0.97595 | 1.88367   | 0.04268       | 0.68930                     |
| RealMANOVA | 0.98856 | 1.78680   | 0.02774       | 1                           |
| RealHAAR   | 0.97955 | 1.75288   | 0.03656       | 0.46169                     |
| RandDCT    | 0.99173 | 1.80394   | 0.02028       | 0.61890                     |

Table 60: Results of Test 2 for  $\Psi_{Shannon}$ ,  $\gamma = 0.25$  and  $\beta = 0.6$

| Frame      | $R^2$   | $\hat{b}$ | $SE(\hat{b})$ | p-value<br>$b = b_{MANOVA}$ |
|------------|---------|-----------|---------------|-----------------------------|
| MANOVA     | 0.99092 | 1.31345   | 0.01815       | 1                           |
| DSS        | 0.99799 | 1.39998   | 0.06277       | 0.19159                     |
| Alltop     | 0.99492 | 1.36593   | 0.02183       | 0.06882                     |
| HAAR       | 0.99322 | 1.28966   | 0.01538       | 0.31990                     |
| RandDFT    | 0.99005 | 1.35857   | 0.01965       | 0.09494                     |
| RealMANOVA | 0.98124 | 1.31460   | 0.02624       | 1                           |
| RealHAAR   | 0.98790 | 1.31414   | 0.02099       | 0.98897                     |
| RandDCT    | 0.99110 | 1.44101   | 0.01681       | 9.1562e-05                  |

Table 61: Results of Test 2 for  $\Psi_{RIP}$ ,  $\gamma = 0.25$  and  $\beta = 0.6$

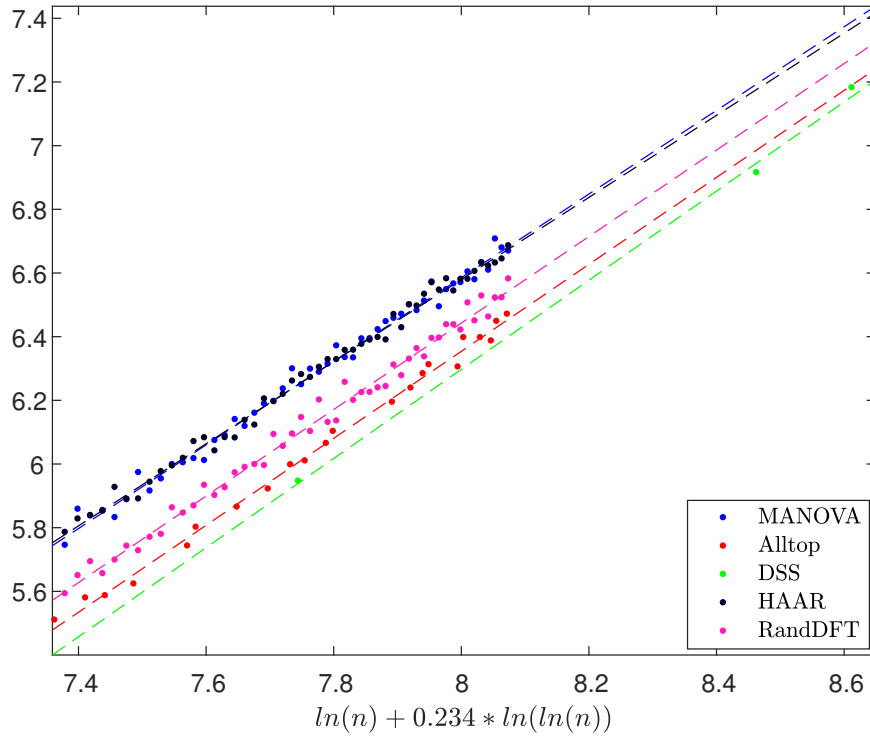

Figure 105: Test 2 for  $\Psi_{RIP}$ , complex frames  $\gamma = 0.25$  and  $\beta = 0.6$ . Plot shows  $-\ln \mathbb{E}_{K_n} (\Delta_{\Psi}(X_{K_n}^{(n)}; n, m_n, k_n)^2)$

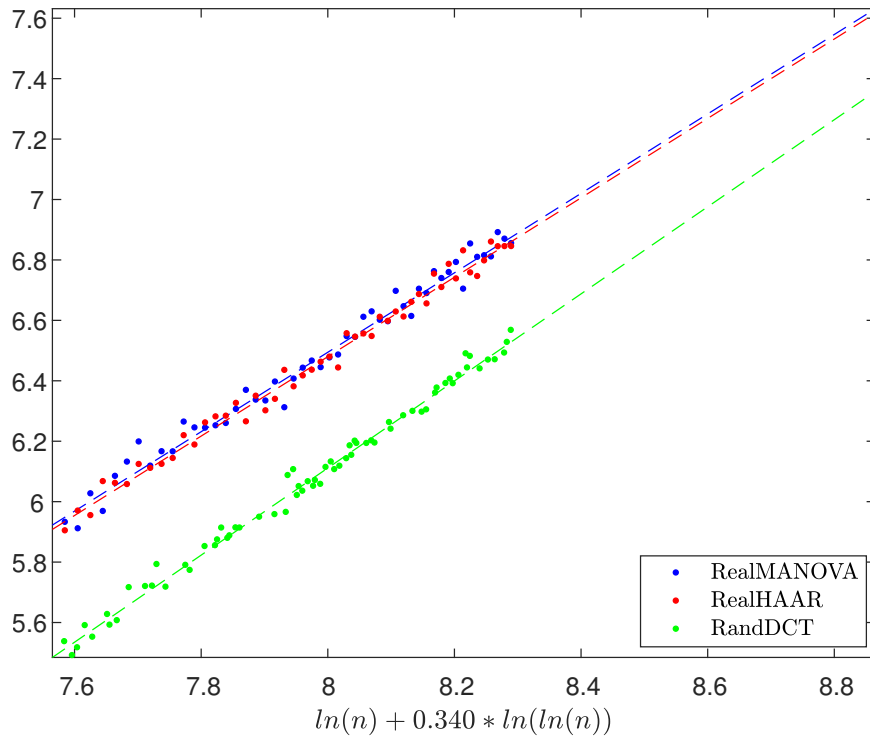

Figure 106: Test 2 for  $\Psi_{RIP}$ , real frames  $\gamma = 0.25$  and  $\beta = 0.6$ . Plot shows  $-\ln \mathbb{E}_{K_n} (\Delta_{\Psi}(X_{K_n}^{(n)}; n, m_n, k_n)^2)$



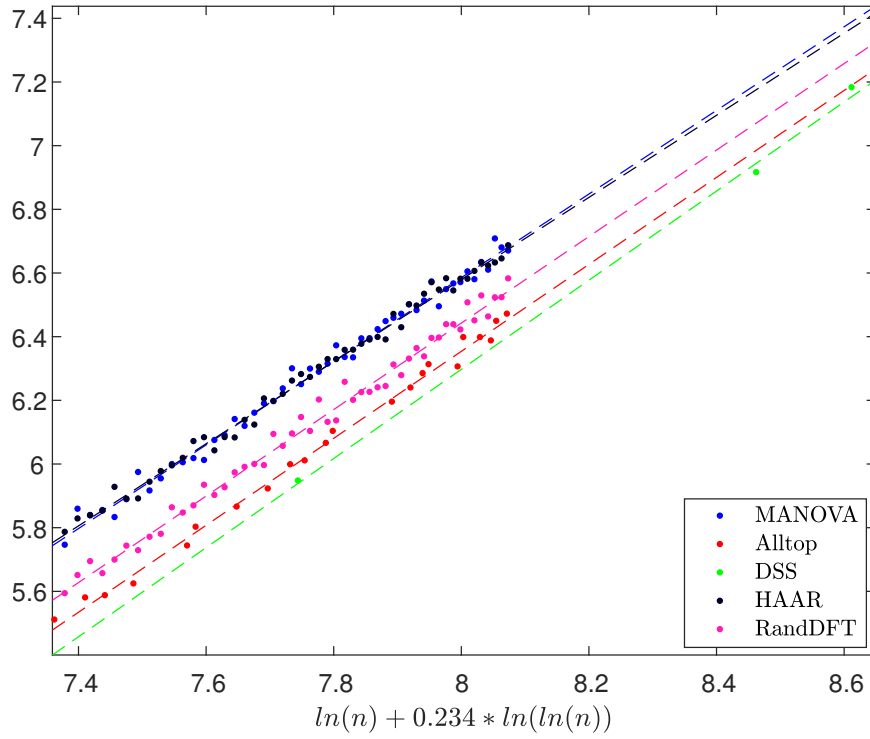

Figure 107: Test 2 for  $\Psi_{max}$ , complex frames  $\gamma = 0.25$  and  $\beta = 0.6$ . Plot shows  $-\ln \mathbb{E}_{K_n}(\Delta_{\Psi}(X_{K_n}^{(n)}; n, m_n, k_n)^2)$

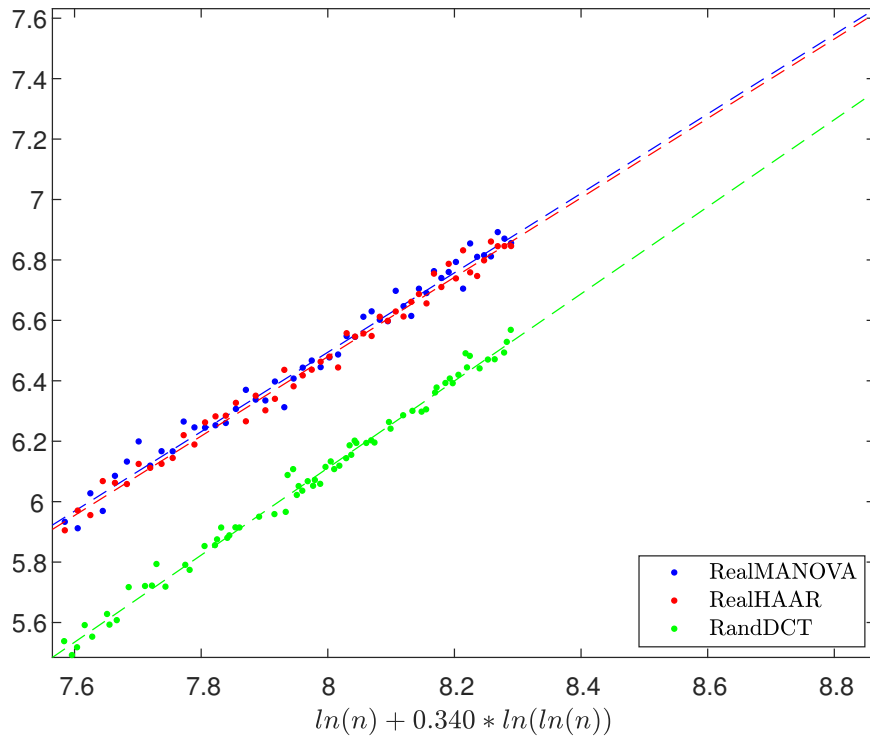

Figure 108: Test 2 for  $\Psi_{max}$ , real frames  $\gamma = 0.25$  and  $\beta = 0.6$ . Plot shows  $-\ln \mathbb{E}_{K_n}(\Delta_{\Psi}(X_{K_n}^{(n)}; n, m_n, k_n)^2)$

| Frame      | $R^2$   | $\hat{b}$ | $SE(\hat{b})$ | p-value<br>$b = b_{MANOVA}$ |
|------------|---------|-----------|---------------|-----------------------------|
| MANOVA     | 0.99092 | 1.31345   | 0.01815       | 1                           |
| DSS        | 0.99799 | 1.39998   | 0.06277       | 0.19159                     |
| Alltop     | 0.99492 | 1.36593   | 0.02183       | 0.06882                     |
| HAAR       | 0.99322 | 1.28966   | 0.01538       | 0.31990                     |
| RandDFT    | 0.99005 | 1.35857   | 0.01965       | 0.09494                     |
| RealMANOVA | 0.98124 | 1.31460   | 0.02624       | 1                           |
| RealHAAR   | 0.98790 | 1.31414   | 0.02099       | 0.98897                     |
| RandDCT    | 0.99110 | 1.44101   | 0.01681       | 9.1562e-05                  |

Table 62: Results of Test 2 for  $\Psi_{max}$ ,  $\gamma = 0.25$  and  $\beta = 0.6$

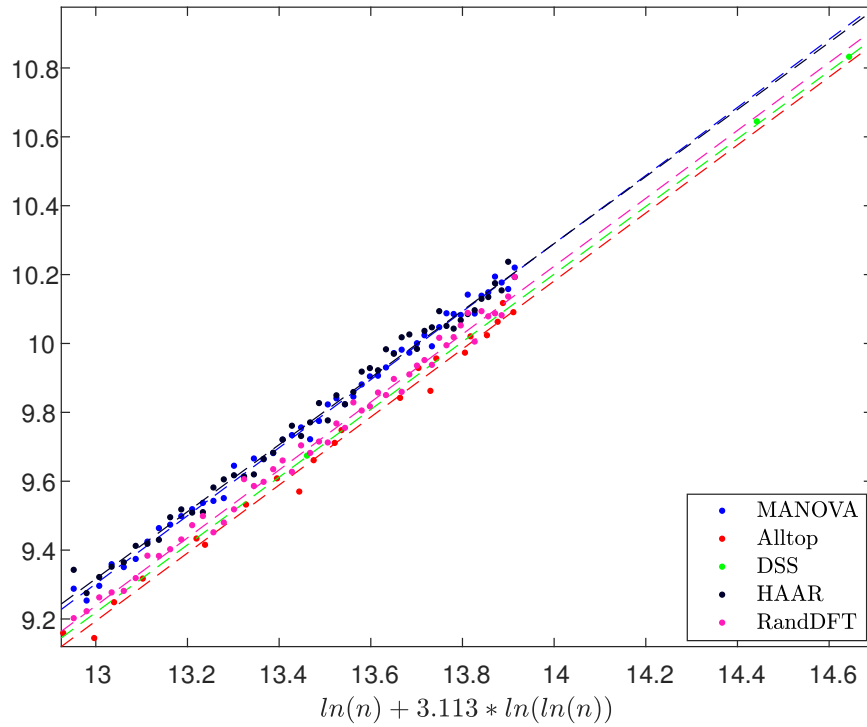

Figure 109: Test 2 for  $\Psi_{min}$ , complex frames  $\gamma = 0.25$  and  $\beta = 0.6$ . Plot shows  $-\ln \mathbb{E}_{K_n}(\Delta_{\Psi}(X_{K_n}^{(n)}; n, m_n, k_n)^2)$

| Frame      | $R^2$   | $\hat{b}$ | $SE(\hat{b})$ | p-value<br>$b = b_{MANOVA}$ |
|------------|---------|-----------|---------------|-----------------------------|
| MANOVA     | 0.99503 | 0.98800   | 0.01008       | 1                           |
| DSS        | 0.99993 | 0.98227   | 0.00825       | 0.66190                     |
| Alltop     | 0.99131 | 0.98723   | 0.02066       | 0.97357                     |
| HAAR       | 0.99098 | 0.97317   | 0.01340       | 0.37865                     |
| RandDFT    | 0.99265 | 0.98587   | 0.01224       | 0.89369                     |
| RealMANOVA | 0.98207 | 0.92557   | 0.01805       | 1                           |
| RealHAAR   | 0.98914 | 0.93239   | 0.01410       | 0.76670                     |
| RandDCT    | 0.97997 | 0.96050   | 0.01690       | 0.16054                     |

Table 63: Results of Test 2 for  $\Psi_{min}$ ,  $\gamma = 0.25$  and  $\beta = 0.6$

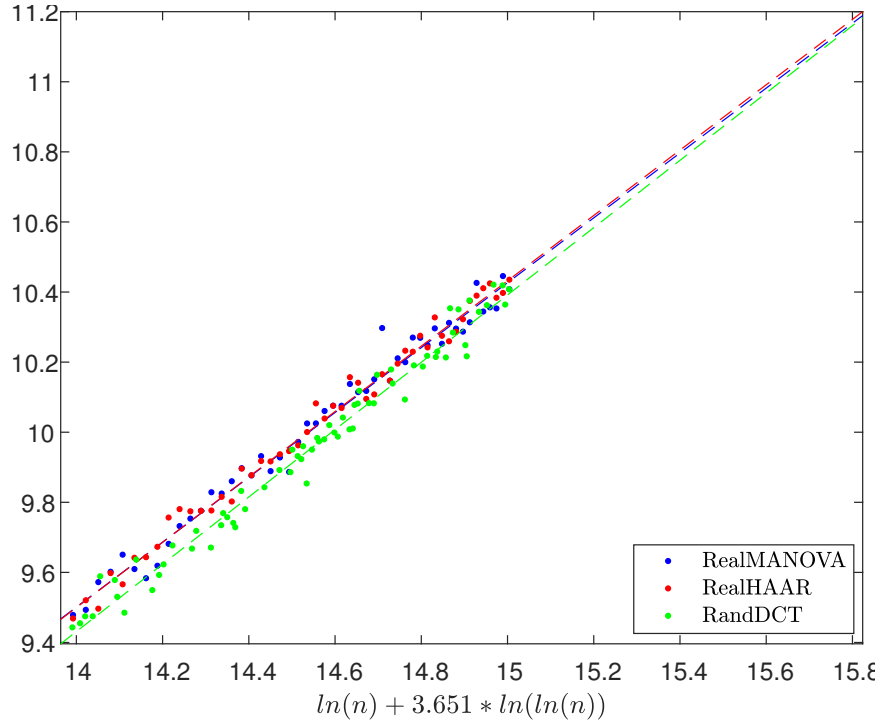

Figure 110: Test 2 for  $\Psi_{min}$ , real frames  $\gamma = 0.25$  and  $\beta = 0.6$ . Plot shows  $-\ln \mathbb{E}_{K_n}(\Delta_{\Psi}(X_{K_n}^{(n)}; n, m_n, k_n)^2)$

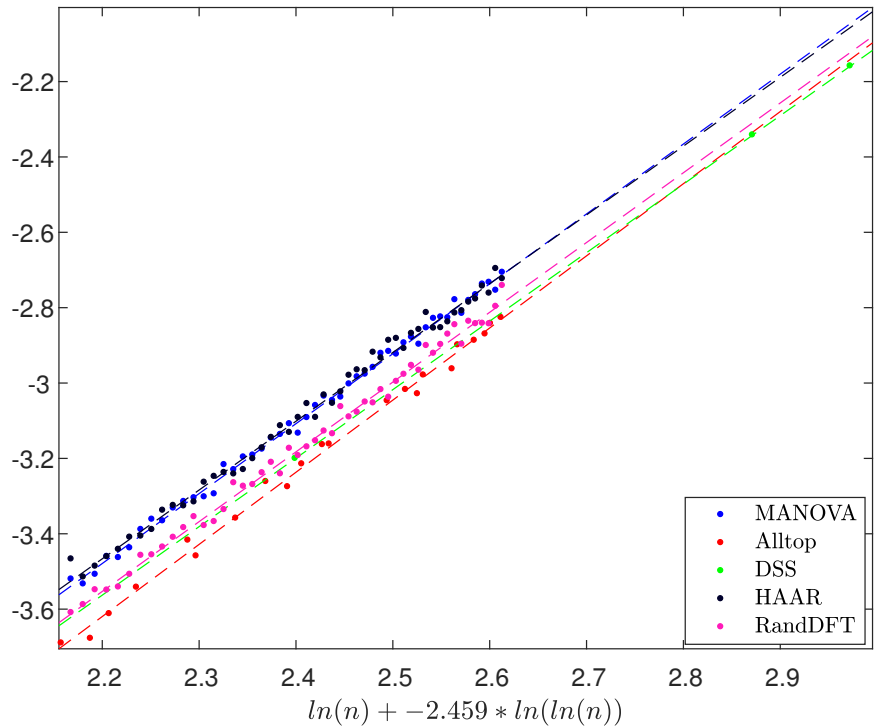

Figure 111: Test 2 for  $\Psi_{cond}$ , complex frames  $\gamma = 0.25$  and  $\beta = 0.6$ . Plot shows  $-\ln \mathbb{E}_{K_n}(\Delta_{\Psi}(X_{K_n}^{(n)}; n, m_n, k_n)^2)$

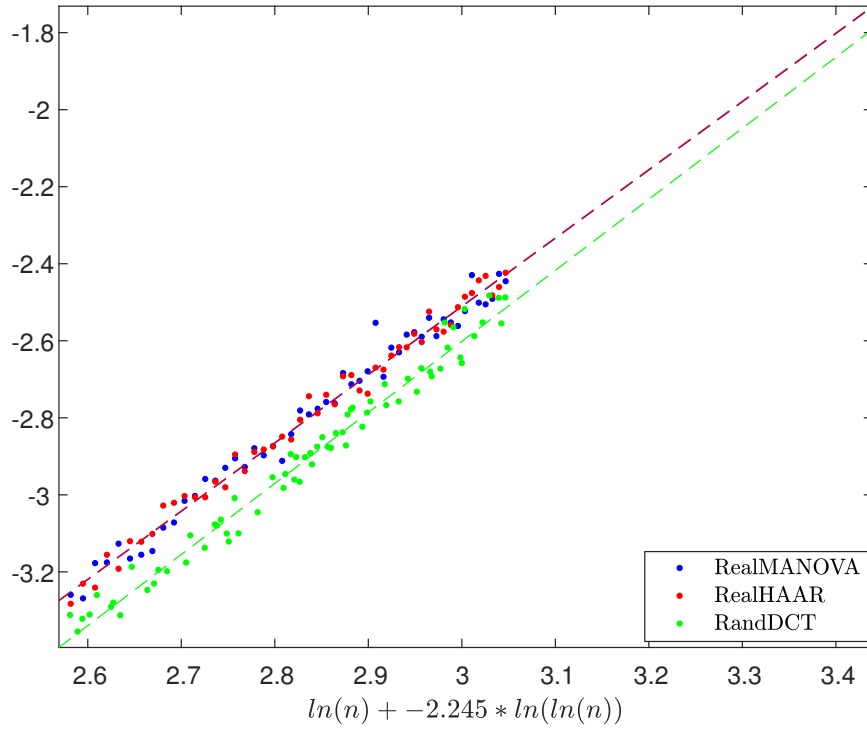

Figure 112: Test 2 for  $\Psi_{cond}$ , real frames  $\gamma = 0.25$  and  $\beta = 0.6$ . Plot shows  $-\ln \mathbb{E}_{K_n}(\Delta_{\Psi}(X_{K_n}^{(n)}; n, m_n, k_n)^2)$

| Frame      | $R^2$   | $\hat{b}$ | $SE(\hat{b})$ | p-value<br>$b = b_{MANOVA}$ |
|------------|---------|-----------|---------------|-----------------------------|
| MANOVA     | 0.99630 | 1.85529   | 0.01632       | 1                           |
| DSS        | 1.00000 | 1.81781   | 0.00044       | 0.02598                     |
| Alltop     | 0.99497 | 1.91434   | 0.03043       | 0.09181                     |
| HAAR       | 0.99271 | 1.82527   | 0.02258       | 0.28394                     |
| RandDFT    | 0.99379 | 1.85176   | 0.02113       | 0.89494                     |
| RealMANOVA | 0.98234 | 1.77223   | 0.03430       | 1                           |
| RealHAAR   | 0.98912 | 1.77294   | 0.02684       | 0.98709                     |
| RandDCT    | 0.98002 | 1.84466   | 0.03242       | 0.12767                     |

Table 64: Results of Test 2 for  $\Psi_{cond}$ ,  $\gamma = 0.25$  and  $\beta = 0.6$

Table 65: Summary of Hypotheses Acceptance

| Frame                       | H1 | H2 | H3 | H4                                      | H5 | H6                                                                                                                 |
|-----------------------------|----|----|----|-----------------------------------------|----|--------------------------------------------------------------------------------------------------------------------|
| <b>Deterministic frames</b> |    |    |    |                                         |    |                                                                                                                    |
| DSS                         | +  | +  | +  | (0.5, 0.5)<br>(0.5, 0.9)                | +  | (0.5, 0.3) $\Psi_{RIP}, \Psi_{max}, \Psi_{min}, \Psi_{cond}$                                                       |
| GF                          | +  | +  | +  | (0.5, 0.6)<br>(0.5, 0.9)                | +  | (0.5, 0.3) $\Psi_{RIP}$                                                                                            |
| RealPF                      | +  | +  | +  | (0.5, 0.8)                              | +  | (0.5, 0.3) $\Psi_{RIP}, \Psi_{max}, \Psi_{min}, \Psi_{cond}$<br>(0.5, 0.7) $\Psi_{max}$<br>(0.5, 0.5) $\Psi_{RIP}$ |
| ComplexPF                   | +  | +  | +  | (0.5, 0.7)<br>(0.5, 0.9)<br>(0.25, 0.8) | +  | (0.5, 0.3) $\Psi_{RIP}, \Psi_{max}$                                                                                |
| Alltop                      | +  | +  | +  |                                         | +  | (0.5, 0.3) $\Psi_{RIP}, \Psi_{max}, \Psi_{cond}$                                                                   |
| SS                          | +  | +  | +  |                                         | +  | (0.5, 0.3) $\Psi_{RIP}$                                                                                            |
| SH                          | +  | +  | +  |                                         | +  | (0.5, 0.9) $\Psi_{RIP}, \Psi_{max}$                                                                                |
| <b>Random frames</b>        |    |    |    |                                         |    |                                                                                                                    |
| HAAR                        | +  | +  | +  | +                                       | +  | +                                                                                                                  |
| RealHAAR                    | +  | +  | +  | +                                       | +  | +                                                                                                                  |
| RandDFT                     | +  | +  | +  | (0.25, 0.8)                             | +  | (0.5, 0.3) $\Psi_{RIP}, \Psi_{max}, \Psi_{cond}$                                                                   |
| RandDCT                     | +  | +  | +  | +                                       | +  | (0.5, 0.9) $\Psi_{RIP}$<br>(0.25, 0.6) $\Psi_{RIP}, \Psi_{max}$                                                    |

Table 65 gives a summary of which hypotheses are accepted/rejected for the particular frame of interest. + means that the hypothesis was accepted for all 8 tested points in the  $(\gamma, \beta)$  phase space (and all functional from H5, H6), without any exceptions. Otherwise, the values for which the hypothesis was rejected for a certain frame are listed in the relevant cell. Empty cells correspond to frames which are irrelevant to the hypothesis.

## A frame that does not satisfy the Universality Hypotheses

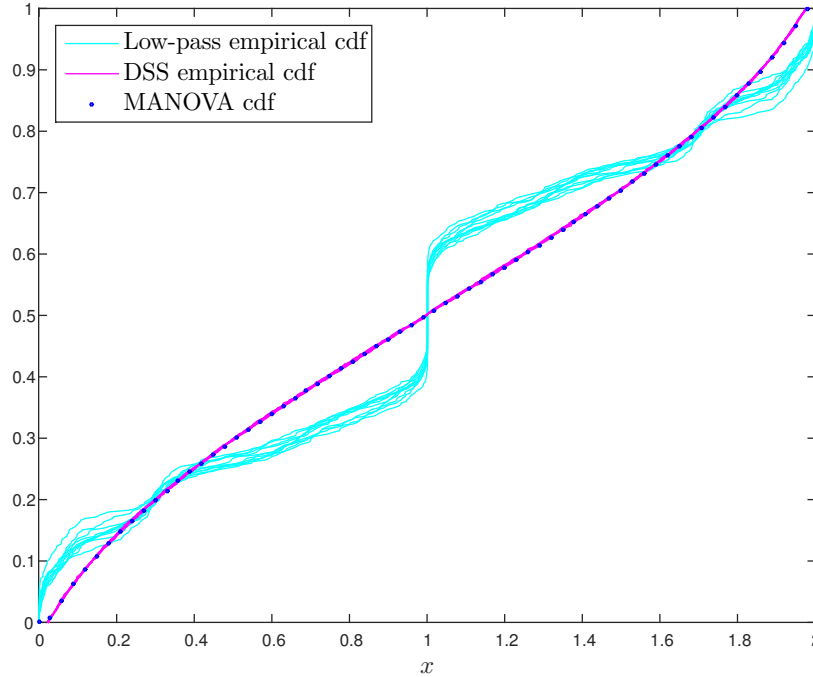

Figure 113: Empirical CDFs for 10 submatrices  $X_K$  of lowpass and DSS frames,  $(n, m, k) = (947, 473, 394)$ .

It is evident from Figure 113 that for low-pass frame, the limiting distribution of  $\lambda(G_K)$ , if exists, is not the MANOVA density. In contrast, the concentration of DSS frame example about the limiting spectrum is notable. In order to verify existence of limiting spectral distribution for low-pass frame, we performed the two-sample Kolmogorov-Smirnov test for pairs of submatrices and evaluated the mean squared KS-distance. Figure 114 shows the vanishing MSE for  $T = 100$  pairs from each dimension. A submatrix of a low-pass frame

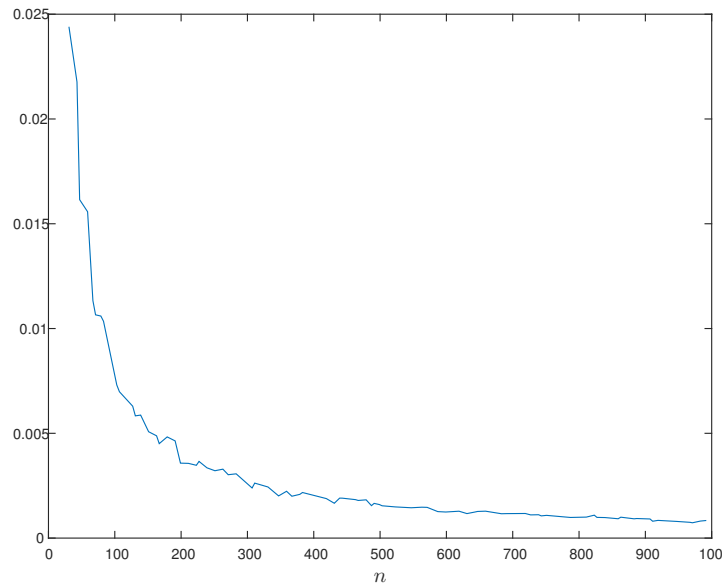

Figure 114:  $\overline{\Delta^2}_{KS}(X_{K_1}, X_{K_2}; n, m, k)$ , low-pass frame,  $\gamma = 0.5$ ,  $\beta = 0.8$ .

can be considered as an  $k$  by  $m$  Vandermonde matrix with unit magnitude complex entries. The work in [1] and [2] establishes the existence of the empirical eigenvalue distribution in the large matrix limit on a wide range of independently and identically distributed phases for Vandermonde matrices. In our case the phases

correspond to the rows from a uniformly distributed random subset of size  $k$  which induces a non independent, though almost uniform distribution on the interval  $[-\pi, \pi]$ .

## The case $\beta > 1$

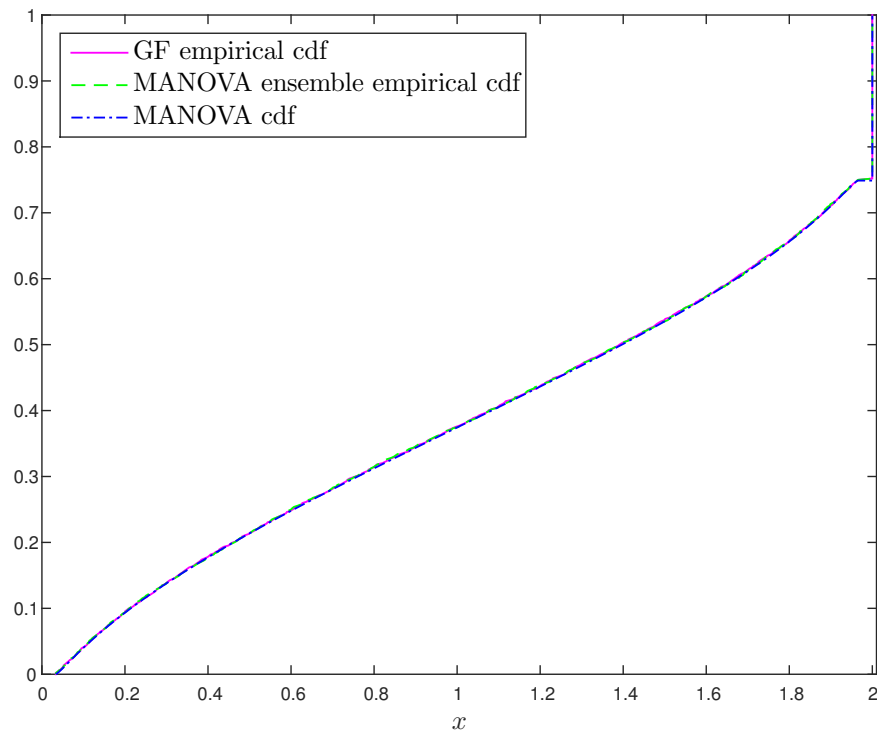

Figure 115: Distributions of non-zero eigenvalues,  $\gamma = 0.5$ ,  $\beta = 1.25$ ,  $n = 1024$ .

Figure 115 shows that also for  $\beta > 1$  the following CDFs coincide: empirical spectral distribution of  $X_K$  from a Grassmannian frame (non-zero eigenvalues), empirical spectral distribution of a random matrix  $\beta \cdot Y_{n,m,k,C}$  and the theoretical density  $\beta f_{\beta,\gamma}^{MANOVA}(x)$ . Same fit to the limiting density is observed for all deterministic frames under study and nonstandard aspect ratio.

## Data Deposition

The data have been deposited in mat files as well as json files in a folder named 'results' at <https://purl.stanford.edu/qg138qm8653>. This folder contains a subfolder for each configuration of parameters,  $(\beta = 0.3, \gamma = 0.5)$ ,  $(\beta = 0.5, \gamma = 0.5)$ ,  $(\beta = 0.6, \gamma = 0.5)$ ,  $(\beta = 0.7, \gamma = 0.5)$ ,  $(\beta = 0.8, \gamma = 0.5)$ ,  $(\beta = 0.9, \gamma = 0.5)$ ,  $(\beta = 0.6, \gamma = 0.25)$ ,  $(\beta = 0.8, \gamma = 0.25)$ . Each one contains a folder named 'func' with results of functionals tests and a folder named 'KS' with results of Kolmogorov-Smirnov test. The results of each type are organized in 3 folders: 'all' with results of all frames, 'complex' with results of complex frames and 'real' with results of real frame. Every file is a struct with the following fields:

FrameName\_KStest

- n\_vec - vector of frame 'n' dimensions on which simulations were preformed.
- Niters -  $T$  - number of iterations.
- ks\_var -  $N$ -dimensional vector with variances of KS-distances (over the iterations);  $N$  - length of n\_vec.
- MSE -  $N$ -dimensional vector with MSEs of KS-distances.
- ks\_max -  $N$ -dimensional vector with the maximal KS-distances.
- ks\_mean -  $N$ -dimensional vector with the average KS-distances.
- p\_var -  $N$ -dimensional vector with variances of p-values.
- p\_mean -  $N$ -dimensional vector with the average p-values.
- beta -  $\frac{1}{\beta}$  (the accurate  $\frac{m}{k}$ ).
- name - string with the frame name (or the MANOVA ensemble).
- time - time that simulation on the frame/MANOVA ensemble lasted.
- num\_workers - number of worker in the aws cluster.
- num\_nodes - number of machines in the aws cluster.
- inds - indices of 'n' vector for which  $\frac{k}{m}$  is as close to  $\beta$  as possible (depends on a frame, the subset of valid  $n$ 's and  $m_n$ , for some exactly  $\beta$  can be achieved and for some it is not possible at all and the indices are the whole vector). Implemented only for  $(\beta = 0.6, \gamma = 0.5)$ ,  $(\beta = 0.8, \gamma = 0.5)$ , the rest (with different grid) use the entire vector.

FrameName\_functionalTest

- n\_vec - vector of frame 'n' dimensions on which simulations were preformed.
- Niters -  $T$  - number of iterations.
- RIPBias - bias of RIP functional
- RIPVar - empirical variance of RIP functional
- RIPMse - MSE of RIP functional
- scoreBias - bias of AC (analog coding) functional
- scoreVar - empirical variance of AC functional
- scoreMse - MSE of AC functional
- scoreShannonBias - bias of Shannon functional



- scoreShannonVar - empirical variance of Shannon functional
- scoreShannonMse - MSE of Shannon functional
- minBias - bias of minimal eigenvalue functional
- minVar - empirical variance of minimal eigenvalue functional
- minMse - MSE of minimal eigenvalue functional
- maxBias - bias of maximal eigenvalue functional
- maxVar - empirical variance of maximal eigenvalue functional
- maxMse - MSE of maximal eigenvalue functional
- condBias - bias of condition number functional
- condVar - empirical variance of condition number functional
- condMse - MSE of condition number functional
- beta -  $\frac{1}{\beta}$ .
- name - string with the frame name (or the MANOVA ensemble).
- time - time that simulation on the frame/MANOVA ensemble lasted.
- num\_workers - number of worker in the aws cluster.
- num\_nodes - number of machines in the aws cluster.
- inds - indices of 'n' vector for which  $\frac{k}{m}$  is as close to  $\beta$  as possible (depends on a frame, the subset of valid n's and  $m_n$ , for some exactly  $\beta$  can be achieved and for some it is not possible at all and the indices are the whole vector).

"FrameNames" in file names:

- SS - Spikes and Sines
- SH - Spikes and Hadamard
- RS - Random Fourier transform (RandDFT)
- RHF - Orthogonal Haar frame (RealHAAR)
- RealPF - Real Paley's construction
- Rdct - Random Cosine transform (RandDCT)
- HF - Unitary Haar frame (HAAR)
- GF - Grassmannian frame
- DSS - Difference-set spectrum
- ComplexPF - Complex Paley's construction
- Alltop - Quadratic Phase Chirp
- AARManova - real MANOVA ensemble
- AAManova - complex MANOVA ensemble

## Code Deposition

The code deposition consists of two folders 'Simulations' and 'TestingAndVisualizing' at <https://purl.stanford.edu/qg138qm8653>.

'Simulations' contains all scripts and functions used to produce the files with the results of the simulations.

- The script 'runKSTests.m' runs the Kolmogorov-Smirnov test on the entire spectrum for all frames and MANOVA ensemble and saves the results. Reproducibility nuance - results for  $(\beta = 0.8, \gamma = 0.5)$  were produced with 'runKSTests1.m', results for  $(\beta = 0.6, \gamma = 0.5)$  were produced with 'runKSTests.m', rest of the results for  $\gamma = 0.5$  were produced with 'runKSTests2.m' and results for  $\gamma = 0.25$  were produced with 'runKSTestsGamma4.m'. (In order to keep reproducibility, new similar scripts and functions were added instead of generalizing the old ones.)
- The script 'runFuncTests.m' runs the functionals tests for all frames and MANOVA ensemble and saves the results. Reproducibility nuance - results for  $(\beta = 0.8, \gamma = 0.5)$  and  $(\beta = 0.6, \gamma = 0.5)$  were produced with 'runFuncTests.m', rest of the results for  $\gamma = 0.5$  were produced with 'runFuncTests2.m' and results for  $\gamma = 0.25$  were produced with 'runFuncTestsGamma4.m'.
- The script 'ParamsSelection.m' adds the vector of most accurate indices to structs of results.

'TestingAndVisualizing' contains all analysis scripts and functions used to generate all figures and tables from results files.

- The script 'mainTestAndPlot' presents the analyzed results of Kolmogorov-Smirnov and functional tests - plots and saves figures and tables of results. One should choose folder with .mat files with results ( $\beta$  value, ks/functionals,complexity) and follow the examples in the script.

(All scripts and functions are documented.)

## References

- [1] Debbah, M. (2008). Asymptotic Behaviour of Random Vandermonde Matrices with Entries on the Unit Circle. *arXiv preprint arXiv:0802.3570*.
- [2] Tucci, G. H., Whiting, P. A. (2011). Eigenvalue results for large scale random vandermonde matrices with unit complex entries. *IEEE Transactions on Information Theory*, 57(6), 3938-3954.
